# Supplementary material for: Controlling rates and reversibilities of elimination reactions of hydroxybenzylammoniums by tuning dearomatization energies
Source: Royal Society of Chemistry journal article supplement (doi:10.1039/d4sc02985b), 2024-01-01
Supplement: d4sc02985b1.pdf [file d4sc02985b1.pdf]

# **Controlling Rates and Reversibilities of Elimination Reactions of Hydroxybenzylammoniums by Tuning Dearomatization Energies**

Zihuan Fu,<sup>‡</sup> Joseph W. Treacy,<sup>‡</sup> Brock M. Hosier, K. N. Houk,\* and Heather D. Maynard\*

Department of Chemistry and Biochemistry and California NanoSystems Institute, University of California, Los Angeles

Los Angeles, California, 90095-1569, United States.

## **Supplemental Information**

## Table of Contents

|                                                                |    |
|----------------------------------------------------------------|----|
| <i>General Experimental Information</i> .....                  | 6  |
| <i>Experimental Procedures and Characterization Data</i> ..... | 7  |
| Compound 1 .....                                               | 7  |
| Compound 2a .....                                              | 8  |
| Compound 12 .....                                              | 9  |
| Compound 2b .....                                              | 10 |
| Compound 4 .....                                               | 11 |
| Compound 5 .....                                               | 12 |
| Compound 6 .....                                               | 13 |
| Compound 7 .....                                               | 14 |
| Compound 8 .....                                               | 15 |
| Compound 3a .....                                              | 16 |
| Compound 13 .....                                              | 17 |
| Compound 3b .....                                              | 18 |
| Compound 9 .....                                               | 19 |
| Compound 14 .....                                              | 20 |
| Compound 10 .....                                              | 21 |
| Compound 15 .....                                              | 22 |
| Compound 16 .....                                              | 23 |
| Compound 17 .....                                              | 24 |
| Compound 11 .....                                              | 25 |
| <i>Phenethylamine Release Studies</i> .....                    | 26 |
| General Release Study Procedure .....                          | 26 |
| Phenethylamine Standard Curve .....                            | 27 |
| Phenethylamine Release From 1 .....                            | 28 |
| Phenethylamine Release From 2a.....                            | 29 |
| Phenethylamine Release From 2b .....                           | 30 |
| Phenethylamine Release From 3a.....                            | 31 |
| Phenethylamine Release From 3b .....                           | 32 |
| Phenethylamine Release From 9 .....                            | 33 |
| Phenethylamine Release From 10.....                            | 34 |

|                                       |    |
|---------------------------------------|----|
| Phenethylamine Release From 11.....   | 35 |
| <i>NMR Spectra</i> .....              | 36 |
| Compound 1 <sup>1</sup> H NMR .....   | 36 |
| Compound 1 <sup>13</sup> C NMR .....  | 37 |
| Compound 2a <sup>1</sup> H NMR .....  | 38 |
| Compound 2a <sup>13</sup> C NMR ..... | 39 |
| Compound 12 <sup>1</sup> H NMR .....  | 40 |
| Compound 12 <sup>13</sup> C NMR ..... | 41 |
| Compound 2b <sup>1</sup> H NMR .....  | 42 |
| Compound 2b <sup>13</sup> C NMR ..... | 43 |
| Compound 4 <sup>1</sup> H NMR .....   | 44 |
| Compound 4 <sup>13</sup> C NMR .....  | 45 |
| Compound 5 <sup>1</sup> H NMR .....   | 46 |
| Compound 5 <sup>13</sup> C NMR .....  | 47 |
| Compound 6 <sup>1</sup> H NMR .....   | 48 |
| Compound 6 <sup>13</sup> C NMR .....  | 49 |
| Compound 7 <sup>1</sup> H NMR .....   | 50 |
| Compound 7 <sup>13</sup> C NMR .....  | 51 |
| Compound 8 <sup>1</sup> H NMR .....   | 52 |
| Compound 8 <sup>13</sup> C NMR .....  | 53 |
| Compound 3a <sup>1</sup> H NMR .....  | 54 |
| Compound 3a <sup>13</sup> C NMR ..... | 55 |
| Compound 13 <sup>1</sup> H NMR .....  | 56 |
| Compound 13 <sup>13</sup> C NMR ..... | 57 |
| Compound 3b <sup>1</sup> H NMR .....  | 58 |
| Compound 3b <sup>13</sup> C NMR ..... | 59 |
| Compound 9 <sup>1</sup> H NMR .....   | 60 |
| Compound 9 <sup>13</sup> C NMR .....  | 61 |
| Compound 14 <sup>1</sup> H NMR .....  | 62 |
| Compound 14 <sup>13</sup> C NMR ..... | 63 |
| Compound 10 <sup>1</sup> H NMR .....  | 64 |
| Compound 10 <sup>13</sup> C NMR ..... | 65 |
| Compound 15 <sup>1</sup> H NMR .....  | 66 |

|                                                                                 |    |
|---------------------------------------------------------------------------------|----|
| Compound 15 <sup>13</sup> C NMR .....                                           | 67 |
| Compound 16 <sup>1</sup> H NMR .....                                            | 68 |
| Compound 16 <sup>13</sup> C NMR .....                                           | 69 |
| Compound 17 <sup>1</sup> H NMR .....                                            | 70 |
| Compound 17 <sup>13</sup> C NMR .....                                           | 71 |
| Compound 11 <sup>1</sup> H NMR .....                                            | 72 |
| Compound 11 <sup>13</sup> C NMR .....                                           | 73 |
| <i>General Computational Details</i> .....                                      | 74 |
| <i>Computed pK<sub>a</sub> Values</i> .....                                     | 75 |
| Aromatic Scaffolds .....                                                        | 75 |
| Heteroaromatic/Aza Scaffolds.....                                               | 75 |
| <i>Computed Energies – Benzylammoniums (Primary Amine)</i> .....                | 76 |
| 1,4-Benzene.....                                                                | 76 |
| 1,4-Naphthalene.....                                                            | 77 |
| 1,4-Anthracene .....                                                            | 78 |
| 9,10-Anthracene .....                                                           | 79 |
| 1,4-Tetracene .....                                                             | 80 |
| 5,12-Tetracene .....                                                            | 81 |
| 6,13-Pentacene.....                                                             | 82 |
| 8-Hydroxyquinoline.....                                                         | 83 |
| 5-Hydroxyquinoline.....                                                         | 84 |
| <i>Computed Energies – Benzylammoniums (Secondary and Tertiary Amine)</i> ..... | 85 |
| 1,4-Naphthalene (Secondary Amine).....                                          | 85 |
| 1,4-Naphthalene (Tertiary Amine).....                                           | 86 |
| <i>Computed Energies – Isomerization</i> .....                                  | 87 |
| 1,4-Hydroxyanthraldehyde.....                                                   | 87 |
| 9,10-Hydroxyanthraldehyde.....                                                  | 88 |
| <i>Calculated Coordinates – Benzylammoniums (Primary Amine)</i> .....           | 89 |
| Methylamine.....                                                                | 89 |
| 1,4-Benzene.....                                                                | 90 |
| 1,4-Naphthalene.....                                                            | 93 |
| 1,4-Anthracene .....                                                            | 96 |
| 9,10-Anthracene .....                                                           | 99 |

|                                                                                                       |            |
|-------------------------------------------------------------------------------------------------------|------------|
| 1,4-Tetracene .....                                                                                   | 102        |
| 5,12-Tetracene .....                                                                                  | 105        |
| 6,13-Pentacene .....                                                                                  | 108        |
| 8-Hydroxyquinoline.....                                                                               | 113        |
| 5-Hydroxyquinoline.....                                                                               | 116        |
| <i>Calculated Coordinates – Benzylammoniums (Benzylammoniums (Secondary and Tertiary Amine)).....</i> | <i>119</i> |
| 1,4-Naphthalene (Secondary Amine).....                                                                | 119        |
| 1,4-Naphthalene (Tertiary Amine) .....                                                                | 122        |
| <i>Calculated Coordinates – Isomerization.....</i>                                                    | <i>125</i> |
| 1,4-Hydroxyanthraldehyde.....                                                                         | 125        |
| 9,10-Hydroxyanthraldehyde.....                                                                        | 128        |
| <i>References .....</i>                                                                               | <i>131</i> |

## General Experimental Information

Unless specifically mentioned, all solvents were purchased as ACS grade solvents and used without any further purification. Anhydrous solvents used were either freshly distilled or passed through activated alumina columns. Reagents were purchased at the highest commercial quality from Sigma-Aldrich, Fisher Scientific, Oakwood Chemical, or Combi-Blocks and were used without further purification, unless otherwise stated. Yields refer to isolated material, unless otherwise stated. Reactions were monitored by reverse-phase high performance liquid chromatography (HPLC), liquid chromatography/mass spectrometry (LC/MS), and/or thin layer chromatography (TLC). Analytical HPLC was carried out on a Agilent 1260 Infinity II HPLC system equipped with an autosampler and a UV detector using a Poroshell 120 2.7  $\mu\text{m}$  C18 120  $\text{\AA}$  column (Analytical: 2.7  $\mu\text{m}$ , 4.6  $\times$  100 mm) with monitoring at  $\lambda = 220$  and 254 nm and with a flow rate of 0.8 mL/min. TLC was performed using Millipore Sigma silica plates (60F-254), using short-wave UV light as the visualizing agent. NMR spectra were recorded on Bruker AV400, AV500, and NEO600 instruments and are calibrated using residual undeuterated solvent. The following abbreviations were used to explain multiplicities: s = singlet, d = doublet, t = triplet, q = quartet, m = multiplet. Flash column chromatography was performed on a Biotage Isolera One 3.0 autocolumn instrument. All silica chromatography unless specifically was carried out on the Biotage using KP-Sil high-performance columns repacked using the Silicycle silica (P60, particle size 40–63  $\mu\text{m}$ , column sizes described in each experimental procedure). Preparative HPLC was performed on Agilent 1290 Infinity II system with an open bed sampler/fraction collector equipped with a UV detector using a Luna 5  $\mu\text{m}$  C18 100A column (5  $\mu\text{m}$ , 250  $\times$  21.2 mm). Electrospray ionization (ESI) mass spectra were obtained using an Agilent 6545 QTOF-ESI in tandem with a 1260 Infinity LC. Direct Analysis in Real Time (DART) mass spectra were obtained using Thermo Exactive Plus Orbitrap with IonSense ID-CUBE DART source. IR spectra were obtained using PerkinElmer Spectrum ONE FT-IR Spectrometer.

## Experimental Procedures and Characterization Data

### Compound 1

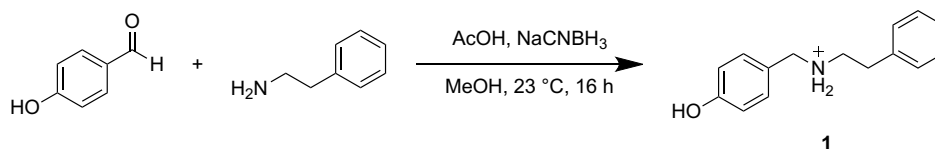

#### General Procedure A (reductive amination with phenethylamine):

To a solution of 4-hydroxybenzaldehyde (100 mg, 1 equiv, 819  $\mu\text{mol}$ ) in methanol (2 mL) was added acetic acid (246 mg, 234  $\mu\text{L}$ , 5 equiv, 4.09 mmol) and 2-phenylethan-1-amine (149 mg, 154  $\mu\text{L}$ , 1.5 equiv, 1.23 mmol). The reaction was stirred at 23 °C for one hour and sodium cyanoborohydride (154 mg, 3 equiv, 2.46 mmol) was added. The reaction was stirred for another 15 hours until LC/MS showed near full conversion. The crude reaction mixture was then purified on preparative HPLC (C18, 5-40% MeCN gradient against water with 0.1% TFA additive over 15 minutes) to afford **1** (191 mg, 68% yield) as its TFA salt.

**Physical State:** White solid

**<sup>1</sup>H NMR (500 MHz, CD<sub>3</sub>CN):**  $\delta$  8.45 (br s, 2H), 7.36 – 7.19 (m, 7H), 6.86 – 6.79 (m, 2H), 4.05 (s, 2H), 3.16 (s, 3H), 3.01 – 2.93 (m, 2H).

**<sup>13</sup>C NMR (126 MHz, CD<sub>3</sub>CN):**  $\delta$  159.00, 137.82, 132.63, 129.74, 129.71, 127.96, 122.97, 116.52, 51.54, 48.96, 32.64.

**HRMS (ESI/Q-TOF):** [M+H]<sup>+</sup> calculated for C<sub>15</sub>H<sub>18</sub>NO<sup>+</sup> 228.1383, found 228.1395.

**IR (Film):** 3188, 2003, 1444, 1268, 1145 cm<sup>-1</sup>.

## Compound 2a

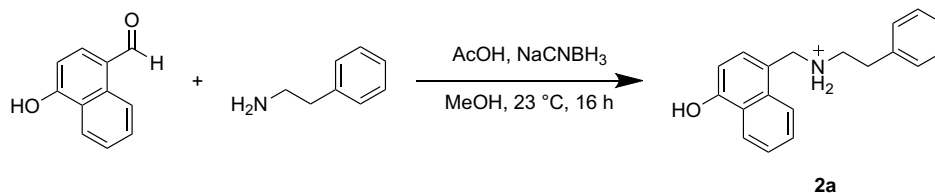

Following General Procedure A using 4-hydroxy-1-naphthaldehyde (50 mg, 290  $\mu\text{mol}$ ) afforded **2a** (65 mg, 166  $\mu\text{mol}$ , 57% yield).

**Physical State:** White solid

**<sup>1</sup>H NMR (500 MHz, CD<sub>3</sub>CN):**  $\delta$  8.47 (br s, 2H), 8.26 (dd,  $J = 8.3, 1.4$  Hz, 1H), 8.01 (d,  $J = 8.4$  Hz, 1H), 7.60 (ddd,  $J = 8.4, 6.8, 1.4$  Hz, 1H), 7.53 (ddd,  $J = 8.0, 6.7, 1.1$  Hz, 1H), 7.47 (d,  $J = 7.8$  Hz, 1H), 7.36 – 7.28 (m, 2H), 7.29 – 7.17 (m, 3H), 6.91 (d,  $J = 7.7$  Hz, 1H), 4.55 (s, 2H), 3.32 – 3.23 (m, 2H), 3.03 – 2.95 (m, 2H).

**<sup>13</sup>C NMR (126 MHz, CD<sub>3</sub>CN):**  $\delta$  155.57, 137.80, 133.61, 131.77, 129.74, 129.70, 128.21, 127.97, 126.15, 125.92, 123.94, 123.75, 118.86, 108.44, 49.46, 48.93, 32.61.

**HRMS (ESI/Q-TOF):**  $[M+H]^+$  calculated for C<sub>19</sub>H<sub>20</sub>NO<sup>+</sup> 278.1539, found 278.1526.

**IR (Film):** 3031, 2818, 1671, 1584, 1521, 1386, 1357, 1285, 1058, 1020 cm<sup>-1</sup>.



## Compound 12

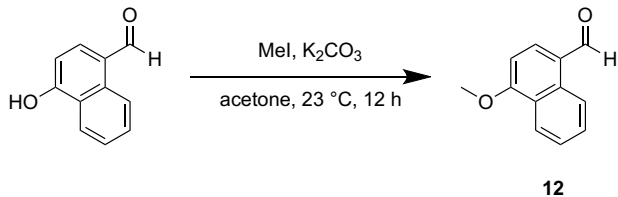

To a solution of 4-hydroxy-1-naphthaldehyde (100 mg, 1 equiv, 581  $\mu$ mol) in acetone (5 mL) was added potassium carbonate (161 mg, 2 equiv, 1.16 mmol) and iodomethane (124 mg, 55  $\mu$ L, 1.5 equiv, 581  $\mu$ mol). The reaction was stirred at 23 °C for 12 hours. The solids were filtered off, and the solution was concentrated under reduced pressure directly on to silica gel (5 g). The crude product was then purified by flash column chromatography (25 g silica gel, 0-40% EtOAc gradient against hexanes over 10 column volumes) to afford **12** (88 mg, 81% yield).

**Physical State:** Orange solid

**TLC (UV):** R<sub>f</sub> 0.33 (1:4 EtOAc:Hexanes)

**<sup>1</sup>H NMR (400 MHz, CDCl<sub>3</sub>):**  $\delta$  10.21 (s, 1H), 9.35 – 9.28 (m, 1H), 8.38 – 8.30 (m, 1H), 7.93 (d,  $J$  = 8.1 Hz, 1H), 7.75 – 7.68 (m, 1H), 7.58 (ddd,  $J$  = 8.3, 6.8, 1.3 Hz, 1H), 6.93 (d,  $J$  = 8.0 Hz, 1H), 4.10 (s, 3H).

**<sup>13</sup>C NMR (101 MHz, CDCl<sub>3</sub>):**  $\delta$  192.51, 161.11, 139.86, 132.16, 129.78, 126.65, 125.78, 125.30, 125.12, 122.61, 103.16, 56.24.

**HRMS (DART):** [M+H]<sup>+</sup> calculated for C<sub>12</sub>H<sub>11</sub>O<sub>2</sub><sup>+</sup> 187.0681, found 187.0597.

**IR (Film):** 2969, 1737, 1572, 1512, 1429, 1365, 1217, 1094, 1059, 1028 cm<sup>-1</sup>.

## Compound 2b

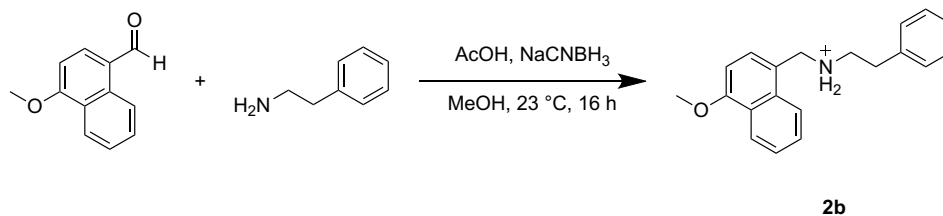

Following General Procedure A using **12** (50 mg, 269  $\mu$ mol) afforded **2b** (57 mg, 52% yield).

**Physical State:** White solid

**<sup>1</sup>H NMR (500 MHz, CD<sub>3</sub>CN):**  $\delta$  8.66 (br s, 2H), 8.29 (ddd,  $J$  = 8.4, 1.6, 0.7 Hz, 1H), 8.04 (dt,  $J$  = 8.6, 1.0 Hz, 1H), 7.66 – 7.53 (m, 3H), 7.35 – 7.29 (m, 2H), 7.29 – 7.18 (m, 3H), 6.93 (d,  $J$  = 8.0 Hz, 1H), 4.56 (s, 2H), 4.00 (s, 3H), 3.29 (dd,  $J$  = 9.9, 6.5 Hz, 2H), 3.00 – 2.93 (m, 2H).

**<sup>13</sup>C NMR (126 MHz, CD<sub>3</sub>CN):**  $\delta$  157.63, 137.85, 133.22, 131.55, 129.74, 129.71, 128.35, 127.96, 126.64, 126.56, 124.04, 123.42, 119.92, 104.44, 56.40, 49.56, 48.82, 32.61.

**HRMS (ESI/Q-TOF):** [M+H]<sup>+</sup> calculated for C<sub>20</sub>H<sub>24</sub>NO<sup>+</sup> 294.1952, found 294.1936.

**IR (Film):** 3031, 1670, 1584, 1517, 1462, 1417, 1394, 1278, 1231, 1095, 1025 cm<sup>-1</sup>.

## Compound 4

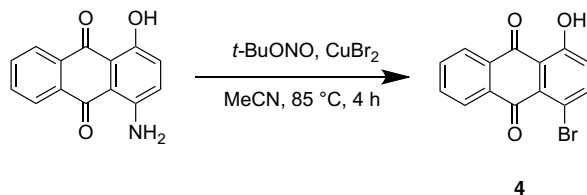

To a solution of 1-amino-4-hydroxyanthraquinone (3.000 g, 1 equiv, 12.54 mmol) in MeCN (50 mL) was added copper (II) bromide (5.602 g, 2 equiv, 25.08 mmol). The mixture was heated to 85 °C, and *tert*-Butyl nitrite (2.586 g, 2.99 mL, 2 equiv, 25.08 mmol) in 20 mL MeCN was added slowly over 10 minutes. The reaction was stirred at 85 °C for 4 hours. The reaction content was then poured into 100 mL 1 M HCl and extracted with DCM (3 x 100 mL). The combined organic layers were dried with anhydrous MgSO<sub>4</sub> and concentrated under reduced pressure directly on to silica gel (10 g). The crude product was then purified by flash column chromatography (100 g silica gel, 0-40% EtOAc gradient against hexanes over 15 column volumes) to afford **4** (2.336 g, 7.71 mmol, 62% yield).

**Physical State:** Orange solid

**TLC (UV):** R<sub>f</sub> 0.73 (1:2 EtOAc:Hexanes)

**<sup>1</sup>H NMR (600 MHz, CDCl<sub>3</sub>):** δ 13.30 (s, 1H), 8.33 – 8.28 (m, 2H), 7.90 (d, *J* = 9.0 Hz, 1H), 7.83 (dtd, *J* = 20.1, 7.4, 1.5 Hz, 2H), 7.17 (d, *J* = 9.0 Hz, 1H).

**<sup>13</sup>C NMR (151 MHz, CDCl<sub>3</sub>):** δ 188.30, 181.43, 163.18, 144.08, 135.31, 134.28, 134.21, 132.25, 130.20, 127.98, 126.77, 125.37, 117.92, 113.34.

**HRMS (DART):** [M-H]<sup>-</sup> calculated for C<sub>14</sub>H<sub>6</sub>BrO<sub>3</sub><sup>-</sup> 300.9506, found 300.9502.

**IR (Film):** 2969, 2354, 1738, 1571, 1435, 1365, 1216, 1093, 1027 cm<sup>-1</sup>.

## Compound 5

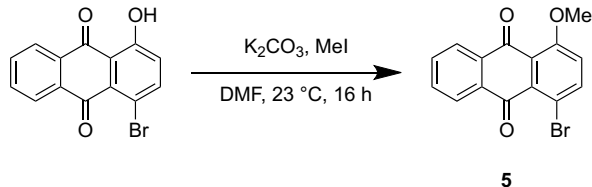

To a solution of 1-bromo-4-hydroxyanthraquinone **4** (1.180 g, 1 equiv, 3.893 mmol) in DMF (20 mL) was added potassium carbonate (1.614 g, 3 equiv, 11.68 mmol) and iodomethane (2.763 g, 5 equiv, 19.46 mmol). The reaction was stirred at 23 °C for 16 hours. The reaction content was poured into 100 mL 1 M HCl and extracted with EtOAc (3 x 50 mL). The combined organic layers were dried with anhydrous  $MgSO_4$  and concentrated under reduced pressure directly on to silica gel (10 g). The crude product was then purified by flash column chromatography (50 g silica gel, 0-50% EtOAc gradient against hexanes over 15 column volumes) to afford **5** (895 mg, 2.82 mmol, 73% yield).

**Physical State:** Yellow solid

**TLC (UV):**  $R_f$  0.33 (1:2 EtOAc:Hexanes)

**$^1H$  NMR (500 MHz,  $CDCl_3$ ):**  $\delta$  8.20 – 8.14 (m, 2H), 7.94 (d,  $J = 9.0$  Hz, 1H), 7.78 – 7.70 (m, 2H), 7.18 (d,  $J = 9.1$  Hz, 1H), 4.04 (s, 3H).

**$^{13}C$  NMR (126 MHz,  $CDCl_3$ ):**  $\delta$  183.00, 182.38, 160.04, 141.94, 134.38, 134.10, 133.68, 133.50, 132.96, 126.89, 126.72, 124.21, 118.61, 112.82, 56.99.

**HRMS (DART):**  $[M+H]^+$  calculated for  $C_{15}H_{10}BrO_3^+$  316.9808, found 316.9804.

**IR (Film):** 3019, 2363, 1712, 1365, 1226, 1092  $cm^{-1}$ .

## Compound 6

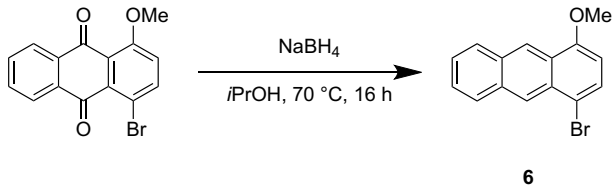

A solution of 1-bromo-4-methoxyanthracene-9,10-dione **5** (1.000 g, 1 equiv, 3.153 mmol) was dissolved in isopropanol (30 mL) and cooled to 0 °C. Sodium borohydride (1.193 g, 10 equiv, 31.53 mmol) was added slowly. The reaction was stirred at 70 °C for 16 hours. The reaction content was poured into 100 mL 1 M HCl and extracted with DCM (3 x 50 mL). The combined organic layers were dried with anhydrous MgSO<sub>4</sub> and concentrated under reduced pressure directly on to silica gel (5 g). The crude product was then purified by flash column chromatography (25 g silica gel, 1% DCM isocratic against hexanes) to afford **6** (421 mg, 1.47 mmol, 47% yield).

**Physical State:** Light yellow solid

**TLC (UV):** R<sub>f</sub> 0.56 (1:9 EtOAc:Hexanes)

**<sup>1</sup>H NMR (500 MHz, CDCl<sub>3</sub>):** δ 8.87 (s, 1H), 8.73 (s, 1H), 8.07 (t, *J* = 9.1 Hz, 2H), 7.67 (d, *J* = 8.0 Hz, 1H), 7.59 – 7.47 (m, 2H), 6.60 (d, *J* = 7.9 Hz, 1H), 4.07 (s, 3H).

**<sup>13</sup>C NMR (126 MHz, CDCl<sub>3</sub>):** δ 155.56, 132.63, 131.57, 130.53, 128.93, 128.65, 128.53, 126.50, 126.13, 126.07, 125.78, 122.02, 113.48, 102.20, 55.89.

**HRMS (DART):** [M+H]<sup>+</sup> calculated for C<sub>15</sub>H<sub>12</sub>BrO<sup>+</sup> 287.0066, found 287.0071.

**IR (Film):** 3011, 2970, 1426, 2158, 2028, 1738, 1435, 1365, 1227, 1216, 1092 cm<sup>-1</sup>.

## Compound 7

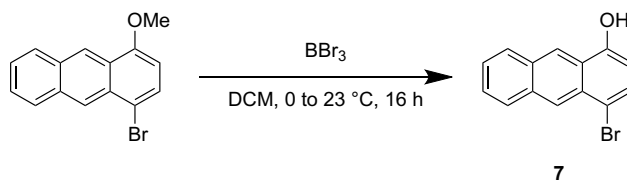

1-bromo-4-methoxyanthracene **6** (60.0 mg, 1 equiv, 209  $\mu\text{mol}$ ) was dissolved in anhydrous DCM (5 mL) and cooled to 0 °C under argon. Boron tribromide (209 mg, 836  $\mu\text{L}$ , 1 molar, 4 equiv, 836  $\mu\text{mol}$ ) was added slowly over 5 minutes. The reaction was stirred at 23 °C for 16 hours. The reaction content was poured into 20 mL 1 M HCl and extracted with DCM (3 x 25 mL). The combined organic layers were dried with anhydrous MgSO<sub>4</sub> and concentrated under reduced pressure directly on to silica gel (5 g). The crude product was then purified by flash column chromatography (25 g silica gel, 0-30% EtOAc gradient against hexanes over 15 column volumes) to afford **7** (37.3 mg, 137  $\mu\text{mol}$ , 65% yield).

**Physical State:** Brown solid

**TLC (UV):** R<sub>f</sub> 0.37 (1:2 EtOAc:Hexanes)

**<sup>1</sup>H NMR (500 MHz, CDCl<sub>3</sub>):**  $\delta$  8.81 (s, 1H), 8.75 (s, 1H), 8.08 (t,  $J = 7.9$  Hz, 2H), 7.60 (d,  $J = 7.7$  Hz, 1H), 7.53 (tt,  $J = 7.7, 5.5$  Hz, 2H), 6.65 (d,  $J = 7.8$  Hz, 1H), 5.39 (s, 1H).

**<sup>13</sup>C NMR (126 MHz, CDCl<sub>3</sub>):**  $\delta$  151.52, 132.74, 131.57, 130.69, 128.75, 128.62, 128.58, 126.63, 126.30, 124.72, 121.85, 106.70.

**HRMS (DART):** [M-H]<sup>-</sup> calculated for C<sub>14</sub>H<sub>9</sub>BrO<sup>-</sup> 270.9764, found 270.9757.

**IR (Film):** 3003, 2969, 2364, 1737, 1434m 1365, 1228, 1226, 1092 cm<sup>-1</sup>.

## Compound 8

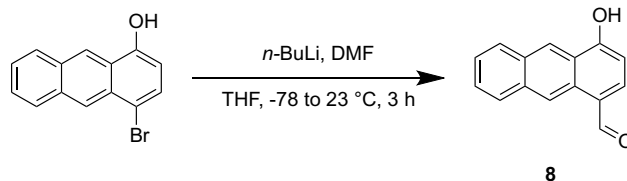

4-bromoanthracen-1-ol **7** (35.0 mg, 1 equiv, 128  $\mu\text{mol}$ ) was dissolved in anhydrous THF (5 mL) and cooled to  $-78\text{ }^{\circ}\text{C}$  under argon. *n*-butyllithium (20.5 mg, 320  $\mu\text{L}$ , 1.8 molar in hexanes, 2.5 equiv, 178  $\mu\text{mol}$ ) was added slowly over 5 minutes. The reaction was stirred at  $-78\text{ }^{\circ}\text{C}$  for one hour. Then, anhydrous DMF (46.8 mg, 49.6  $\mu\text{L}$ , 5 equiv, 641  $\mu\text{mol}$ ) was added and this was allowed to stir at  $-78\text{ }^{\circ}\text{C}$  for one hour and at  $23\text{ }^{\circ}\text{C}$  for another hour. The reaction content was poured into 10 mL saturated  $\text{NH}_4\text{Cl}$  solution and extracted with DCM (3 x 25 mL). The combined organic layers were dried with anhydrous  $\text{MgSO}_4$  and concentrated under reduced pressure directly on to silica gel (1 g). The crude product was then purified by flash column chromatography (10 g silica gel, 0-40% EtOAc gradient against hexanes over 20 column volumes) to afford **8** (15.3 mg, 68.8  $\mu\text{mol}$ , 54% yield).

**Physical State:** Yellow solid

**TLC (UV):**  $R_f$  0.24 (1:2 EtOAc:Hexanes)

**$^1\text{H}$  NMR (500 MHz, Acetone):**  $\delta$  10.59 (s, 1H), 10.19 (s, 1H), 10.01 (s, 1H), 9.00 (s, 1H), 8.22 – 8.12 (m, 2H), 8.04 (d,  $J = 7.7$  Hz, 1H), 7.60 (dddd,  $J = 17.9, 8.0, 6.6, 1.4$  Hz, 2H), 7.08 (d,  $J = 7.7$  Hz, 1H).

**$^{13}\text{C}$  NMR (126 MHz, Acetone):**  $\delta$  192.63, 160.83, 143.41, 134.73, 132.15, 130.11, 129.70, 129.62, 127.84, 127.10, 125.49, 125.17, 125.06, 123.08, 106.21.

**HRMS (DART):**  $[\text{M}-\text{H}]^-$  calculated for  $\text{C}_{15}\text{H}_9\text{O}_2^-$  221.0608, found 221.0601.

**IR (Film):** 3454, 3017, 2970, 2513, 2158, 1977, 1736, 1435, 1366, 1228, 1216, 1092  $\text{cm}^{-1}$ .

## Compound 3a

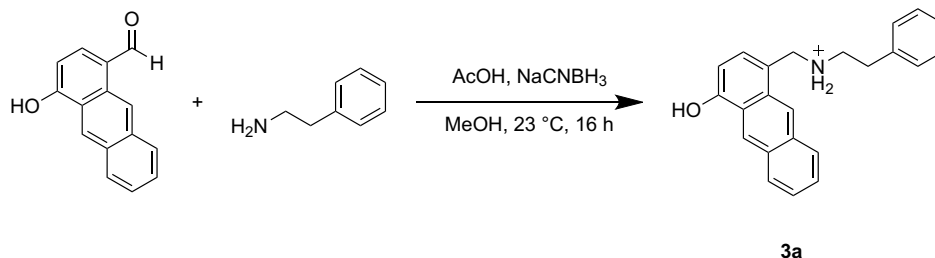

Following General Procedure A using 4-hydroxyanthracene-1-carbaldehyde **8** (50 mg, 225  $\mu\text{mol}$ ) afforded **3a** (23 mg, 52.8  $\mu\text{mol}$ , 24% yield).

**Physical State:** Yellow solid

**$^1\text{H}$  NMR (500 MHz,  $\text{CD}_3\text{CN}$ ):**  $\delta$  8.90 (s, 1H), 8.65 (s, 1H), 8.35 (br s, 2H), 8.15 – 8.06 (m, 2H), 7.62 – 7.52 (m, 2H), 7.50 (d,  $J = 7.5$  Hz, 1H), 7.32 (dd,  $J = 8.5, 6.4$  Hz, 2H), 7.28 – 7.20 (m, 3H), 6.85 (d,  $J = 7.4$  Hz, 1H), 4.69 (s, 2H), 3.34 (t,  $J = 8.0$  Hz, 2H), 3.05 – 2.98 (m, 2H).

**$^{13}\text{C}$  NMR (126 MHz,  $\text{CD}_3\text{CN}$ ):**  $\delta$  155.69, 137.75, 133.04, 131.91, 131.81, 131.35, 129.75, 129.71, 129.40, 129.03, 127.99, 127.42, 126.80, 125.40, 123.02, 122.79, 118.87, 105.82, 49.63, 49.57, 32.61.

**HRMS (ESI/Q-TOF):**  $[\text{M}+\text{H}]^+$  calculated for  $\text{C}_{23}\text{H}_{22}\text{NO}^+$  328.1696, found 328.1774.

**IR (Film):** 3459, 3014, 2969, 2360, 2335, 1738, 1433, 1365, 1227, 1216, 1140, 1092  $\text{cm}^{-1}$ .



## Compound 13

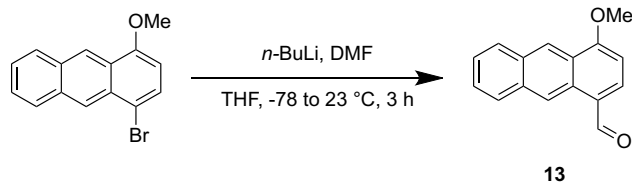

1-bromo-4-methoxyanthracene **6** (150 mg, 1 equiv, 522  $\mu\text{mol}$ ) was dissolved in anhydrous THF (5 mL) and cooled to  $-78\text{ }^{\circ}\text{C}$  under argon. *n*-butyllithium (36.8 mg, 230  $\mu\text{L}$ , 2.5 molar in hexanes, 1.1 equiv, 178  $\mu\text{mol}$ ) was added slowly over 5 minutes. The reaction was stirred at  $-78\text{ }^{\circ}\text{C}$  for one hour. Then, anhydrous DMF (191 mg, 202  $\mu\text{L}$ , 5 equiv, 2.61 mmol) was added and this was allowed to stir at  $-78\text{ }^{\circ}\text{C}$  for one hour and at  $23\text{ }^{\circ}\text{C}$  for another hour. The reaction content was poured into 10 mL saturated  $\text{NH}_4\text{Cl}$  solution and extracted with DCM (3 x 25 mL). The combined organic layers were dried with anhydrous  $\text{MgSO}_4$  and concentrated under reduced pressure directly on to silica gel (1 g). The crude product was then purified by flash column chromatography (10 g silica gel, 0-20% EtOAc gradient against hexanes over 15 column volumes) to afford **13** (72.1 mg, 305  $\mu\text{mol}$ , 58% yield).

**Physical State:** Green solid

**TLC (UV):**  $R_f$  0.19 (1:9 EtOAc:Hexanes)

**$^1\text{H}$  NMR (500 MHz,  $\text{CDCl}_3$ ):**  $\delta$  10.21 (s, 1H), 9.97 (s, 1H), 8.91 (s, 1H), 8.16 – 8.03 (m, 2H), 7.94 (d,  $J = 7.9$  Hz, 1H), 7.55 (dq,  $J = 8.1, 6.6, 1.5$  Hz, 2H), 6.86 (d,  $J = 7.9$  Hz, 1H), 4.19 (s, 3H).

**$^{13}\text{C}$  NMR (126 MHz,  $\text{CDCl}_3$ ):**  $\delta$  192.53, 161.48, 141.99, 133.85, 131.46, 129.10, 128.77, 128.66, 126.87, 126.33, 125.52, 124.81, 124.56, 122.00, 100.93, 56.25.

**HRMS (DART):**  $[\text{M}+\text{H}]^+$  calculated for  $\text{C}_{16}\text{H}_{13}\text{O}_2^+$  237.0910, found 237.0906.

**IR (Film):** 3189, 2959, 2497, 2156, 2004, 1541, 1369, 1269, 1222, 1162, 1033, 1004  $\text{cm}^{-1}$ .

## Compound 3b

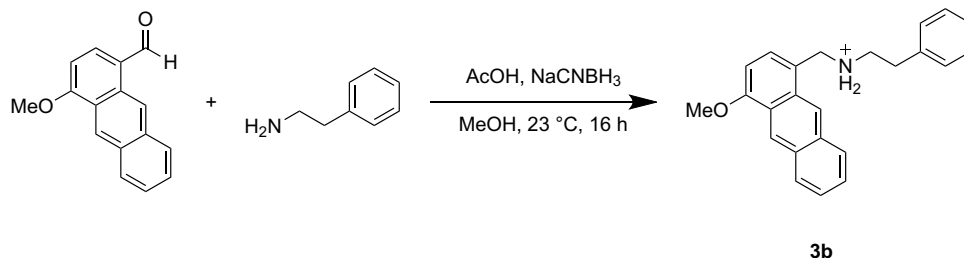

Following General Procedure A using 4-hydroxyanthracene-1-carbaldehyde **13** (70 mg, 296  $\mu\text{mol}$ ) afforded **3b** (135 mg, quant. yield).

**Physical State:** Yellow solid

**<sup>1</sup>H NMR (500 MHz, CD<sub>3</sub>CN):**  $\delta$  8.90 (d,  $J = 5.5$  Hz, 1H), 8.68 (d,  $J = 5.8$  Hz, 1H), 8.15 – 8.07 (m, 2H), 7.57 (ddd,  $J = 15.1, 7.7, 4.0$  Hz, 3H), 7.30 (q,  $J = 6.9$  Hz, 2H), 7.26 – 7.18 (m, 3H), 6.84 (d,  $J = 7.6$  Hz, 1H), 4.69 (d,  $J = 5.7$  Hz, 2H), 4.08 (d,  $J = 6.3$  Hz, 3H), 3.34 (dd,  $J = 9.7, 6.6$  Hz, 2H), 3.02 (dd,  $J = 9.6, 6.5$  Hz, 2H).

**<sup>13</sup>C NMR (126 MHz, CD<sub>3</sub>CN):**  $\delta$  157.75, 137.95, 133.04, 131.98, 131.44, 131.03, 129.72, 129.70, 129.40, 129.06, 127.93, 127.46, 126.95, 125.79, 123.00, 122.67, 120.11, 102.14, 56.52, 49.57, 49.35, 32.66.

**HRMS (ESI/Q-TOF):**  $[M+H]^+$  calculated for C<sub>24</sub>H<sub>24</sub>NO<sup>+</sup> 342.1852, found 342.1869.

**IR (Film):** 3383, 3204, 3010, 2312, 1681, 1275, 1261, 1183, 1014 cm<sup>-1</sup>.

## Compound 9

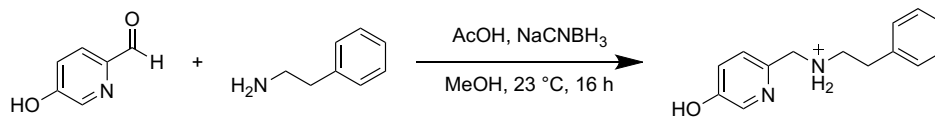

9

Following General Procedure A using 5-hydroxypicolinaldehyde (50 mg, 406  $\mu$ mol) afforded **9** (11.4 mg, 8% yield).

**Physical State:** White solid

**<sup>1</sup>H NMR (500 MHz, CD<sub>3</sub>CN):**  $\delta$  8.19 – 8.14 (m, 1H), 7.42 – 7.22 (m, 7H), 4.26 (s, 3H), 3.31 (t,  $J$  = 7.8 Hz, 2H), 3.02 (t,  $J$  = 7.8 Hz, 2H).

**<sup>13</sup>C NMR (126 MHz, CD<sub>3</sub>CN):**  $\delta$  155.22, 141.14, 137.39, 137.14, 129.86, 129.81, 128.23, 125.95, 125.91, 50.61, 49.75, 32.60.

**HRMS (ESI/Q-TOF):** [M+H]<sup>+</sup> calculated for C<sub>14</sub>H<sub>17</sub>NO<sup>+</sup> 229.1335, found 229.1354.

**IR (Film):** 3439, 3012, 2969, 2365, 2157, 1977, 1737, 1570, 1435, 1365, 1228, 1216, 1140, 1092, 1010 cm<sup>-1</sup>.

## Compound 14

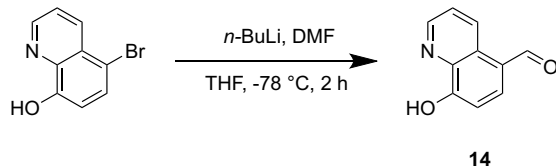

A solution of 5-bromoquinolin-8-ol (300 mg, 1 equiv, 1.34 mmol) in anhydrous THF (20 mL) was cooled to  $-78\text{ }^{\circ}\text{C}$  under argon. *n*-butyllithium (189 mg, 1.18 mL, 2.5 M in hexanes, 2.2 equiv, 2.95 mmol) was added slowly over 5 minutes. The reaction was allowed to stir at  $-78\text{ }^{\circ}\text{C}$  for one hour. Then anhydrous DMF (294 mg, 311  $\mu\text{L}$ , 3 equiv, 4.02 mmol) was added, and the reaction was allowed to stir at  $-78\text{ }^{\circ}\text{C}$  for another hour. The reaction was then quenched with water (50 mL) and extracted with DCM (3 x 50 mL). The combined organic layers were dried with anhydrous  $\text{MgSO}_4$  and concentrated under reduced pressure directly on to silica gel (5 g). The crude product was then purified by flash column chromatography (50 g silica gel, 10-80% EtOAc gradient against hexanes over 15 column volumes) to afford **14** (100 mg, 577  $\mu\text{mol}$ , 43% yield).

**Physical State:** Pale yellow solid

**$^1\text{H}$  NMR (400 MHz,  $\text{CDCl}_3$ ):**  $\delta$  10.14 (s, 1H), 9.68 (dd,  $J = 8.7, 1.6$  Hz, 1H), 8.86 (dd,  $J = 4.2, 1.6$  Hz, 1H), 8.00 (d,  $J = 7.9$  Hz, 1H), 7.66 (dd,  $J = 8.6, 4.2$  Hz, 1H), 7.28 (d,  $J = 7.9$  Hz, 1H).

**$^{13}\text{C}$  NMR (101 MHz,  $\text{CDCl}_3$ ):**  $\delta$  192.16, 157.99, 148.86, 140.58, 137.99, 134.94, 126.75, 124.86, 123.73, 109.15.

**HRMS (DART):**  $[\text{M}+\text{H}]^+$  calculated for  $\text{C}_{10}\text{H}_8\text{NO}_2^+$  174.0550, found 174.0548.

**IR (Film):** 3201, 2314, 1503, 1275, 1143  $\text{cm}^{-1}$ .

## Compound 10

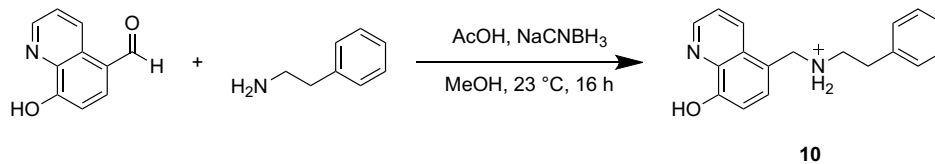

Following General Procedure A using **14** (46 mg, 263  $\mu\text{mol}$ ) afforded **10** (45 mg, 89  $\mu\text{mol}$ , 34% yield).

**Physical State:** Yellow solid

**$^1\text{H}$  NMR (500 MHz,  $\text{CD}_3\text{CN}$ ):**  $\delta$  8.93 (dd,  $J = 4.4, 1.3$  Hz, 1H), 8.73 (d,  $J = 8.6$  Hz, 1H), 7.74 (dd,  $J = 8.7, 4.4$  Hz, 1H), 7.66 (d,  $J = 8.0$  Hz, 1H), 7.39 – 7.32 (m, 2H), 7.32 – 7.25 (m, 3H), 7.03 (d,  $J = 7.8$  Hz, 1H), 4.58 (s, 2H), 3.38 (t,  $J = 8.1$  Hz, 2H), 3.04 (t,  $J = 8.2$  Hz, 3H).

**$^{13}\text{C}$  NMR (126 MHz,  $\text{CD}_3\text{CN}$ ):**  $\delta$  137.66, 133.90, 129.79, 129.73, 128.49, 128.05, 123.44, 111.69, 50.01, 48.17, 32.67.

**HRMS (ESI/Q-TOF):**  $[\text{M}+\text{H}]^+$  calculated for  $\text{C}_{18}\text{H}_{19}\text{N}_2\text{O}^+$  279.1492, found 279.1483.

**IR (Film):** 3338, 3009, 2987, 2315, 1682, 1276, 1261, 1198  $\text{cm}^{-1}$ .

## Compound 15

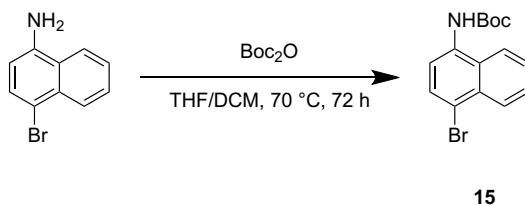

To a solution of 4-bromonaphthalen-1-amine (1.000 g, 1 equiv, 4.503 mmol) in THF (20 mL) and DCM (40 mL) was added di-*tert*-butyl dicarbonate (1.081 g, 1.14 mL, 1.1 equiv, 4.953 mmol). The reaction was refluxed at 70 °C for 72 hours. The reaction mixture was then concentrated under reduced pressure directly on to silica gel (5 g). The crude product was then purified by flash column chromatography (50 g silica gel, 0-40% EtOAc gradient against hexanes over 10 column volumes) to afford **15** (1.345 g, 4.174 mmol, 93% yield).

**Physical State:** White solid

**TLC (UV):**  $R_f$  0.61 (1:4 EtOAc:Hexanes)

**$^1\text{H NMR}$  (500 MHz,  $\text{CDCl}_3$ ):**  $\delta$  8.28 – 8.25 (m, 1H), 7.89 – 7.86 (m, 1H), 7.77 (q,  $J = 8.5$  Hz, 2H), 7.63 – 7.55 (m, 2H), 6.83 (s, 1H), 1.56 (s, 9H).

**$^{13}\text{C NMR}$  (126 MHz,  $\text{CDCl}_3$ ):**  $\delta$  153.35, 146.89, 133.10, 132.36, 129.95, 128.25, 127.43, 126.95, 120.98, 85.34, 81.19, 28.49, 27.57.

**HRMS (DART):**  $[M+H]^+$  calculated for  $\text{C}_{15}\text{H}_{17}\text{BrNO}_2^+$  322.0437, found 322.0404.

**IR (Film):** 2986, 2313, 1688, 1534, 1491, 1364, 1328, 1273, 1260, 1155, 1001  $\text{cm}^{-1}$ .

## Compound 16

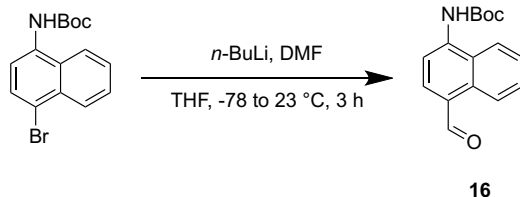

A solution of tert-butyl (4-bromonaphthalen-1-yl)carbamate **15** (500 mg, 1 equiv, 1.55 mmol) in anhydrous THF (20 mL) was cooled to -78 °C under argon. *n*-butyllithium (348 mg, 2.17 mL, 2.5 M in hexanes, 3.5 equiv, 5.43 mmol) was added slowly over 5 minutes. The reaction was allowed to stir at -78 °C for one hour. Then anhydrous DMF (709 mg, 751  $\mu$ L, 6.25 equiv, 9.70 mmol) was added, and the reaction was allowed to stir at -78 °C for one hour and at 23 °C for another hour. The reaction was then quenched with water (50 mL) and extracted with EtOAc (3 x 50 mL). The combined organic layers were dried with anhydrous MgSO<sub>4</sub> and concentrated under reduced pressure directly on to silica gel (5 g). The crude product was then purified by flash column chromatography (50 g silica gel, 0-40% EtOAc gradient against hexanes over 15 column volumes) to afford **16** (261 mg, 962  $\mu$ mol, 62% yield).

**Physical State:** Light yellow solid

**TLC (UV):** R<sub>f</sub> 0.43 (1:4 EtOAc:Hexanes)

**<sup>1</sup>H NMR (500 MHz, CDCl<sub>3</sub>):**  $\delta$  10.25 (s, 1H), 9.42 (ddd, *J* = 8.6, 1.3, 0.6 Hz, 1H), 8.33 (d, *J* = 8.1 Hz, 1H), 7.97 (d, *J* = 8.1 Hz, 1H), 7.89 (dt, *J* = 8.4, 0.9 Hz, 1H), 7.71 (ddd, *J* = 8.4, 6.9, 1.2 Hz, 1H), 7.63 (ddd, *J* = 8.3, 6.8, 1.3 Hz, 1H), 7.31 (s, 1H), 1.58 (s, 9H).

**<sup>13</sup>C NMR (126 MHz, CDCl<sub>3</sub>):**  $\delta$  192.76, 152.44, 139.57, 138.82, 131.69, 129.15, 127.13, 126.74, 126.30, 124.47, 119.74, 114.10, 82.00, 28.44.

**HRMS (DART):** [M+H]<sup>+</sup> calculated for C<sub>16</sub>H<sub>18</sub>NO<sub>3</sub><sup>+</sup> 272.1281, found 272.1285.

**IR (Film):** 3216, 2986, 2315, 1682, 1576, 1524, 1505, 1458, 1392, 1363, 1330, 1261, 1216, 1146, 1085, 1060 cm<sup>-1</sup>.

## Compound 17

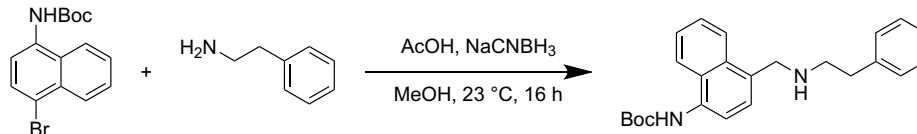

17

To solution of tert-butyl (4-formylnaphthalen-1-yl)carbamate **16** (250 mg, 1 equiv, 921  $\mu$ mol) in methanol (5 mL) was added acetic acid (55.3 mg, 52.7  $\mu$ L, 1 equiv, 921  $\mu$ mol), 2-phenylethan-1-amine (223 mg, 232  $\mu$ L, 2 equiv, 1.84 mmol), and sodium cyanoborohydride (174 mg, 3 equiv, 2.76 mmol). The reaction was allowed to stir at 23 °C for 16 hours. The reaction was then concentrated under reduced pressure directly on to silica gel (5 g). The crude product was then purified by flash column chromatography (50 g silica gel, 10-60% EtOAc gradient against hexanes over 15 column volumes) to afford **17** (253 mg, 671  $\mu$ mol, 73% yield).

**Physical State:** White solid

**TLC (UV):** R<sub>f</sub> 0.72 (2:1 EtOAc:Hexanes)

**<sup>1</sup>H NMR (600 MHz, CD<sub>3</sub>CN):**  $\delta$  8.18 – 8.13 (m, 1H), 8.00 – 7.96 (m, 1H), 7.57 – 7.44 (m, 4H), 7.42 (d,  $J$  = 7.6 Hz, 1H), 7.30 – 7.16 (m, 5H), 4.17 (s, 2H), 2.92 (t,  $J$  = 7.2 Hz, 2H), 2.80 (t,  $J$  = 7.2 Hz, 2H), 1.51 (s, 9H).

**<sup>13</sup>C NMR (151 MHz, CD<sub>3</sub>CN):**  $\delta$  155.14, 141.71, 134.64, 133.94, 133.28, 129.66, 129.29, 129.23, 126.83, 126.77, 126.70, 126.52, 125.64, 123.44, 121.30, 80.42, 51.91, 51.86, 36.94, 28.51.

**HRMS (DART):** [M+H]<sup>+</sup> calculated for C<sub>24</sub>H<sub>29</sub>N<sub>2</sub>O<sub>2</sub><sup>+</sup> 377.2224, found 377.2226.

**IR (Film):** 3340, 3202, 2678, 2357, 2120, 1274 cm<sup>-1</sup>.



## Compound 11

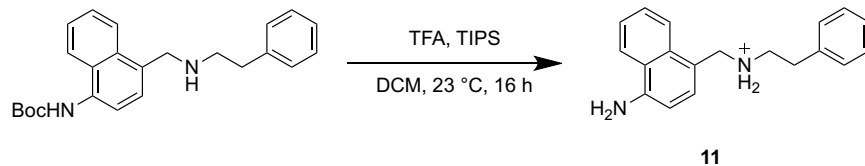

To solution of tert-butyl (4-((phenethylamino)methyl)naphthalen-1-yl)carbamate **17** (253 mg, 1 equiv, 671  $\mu\text{mol}$ ) in DCM (5 mL) was added triisopropylsilane (117 mg, 151  $\mu\text{L}$ , 1.1 equiv, 738  $\mu\text{mol}$ ) and trifluoroacetic acid (7.68 g, 5.17 mL, 100 equiv, 67.1 mmol). The reaction was allowed to stir at 23 °C for 16 hours. The reaction was then purified on preparative HPLC (C18, 5-40% MeCN gradient against water with 0.1% TFA additive over 15 minutes) to afford **11** (216 mg, 428  $\mu\text{mol}$ , 64% yield).

**Physical State:** Beige solid

**$^1\text{H}$  NMR (500 MHz,  $\text{CD}_3\text{CN}$ ):**  $\delta$  8.02 – 7.88 (m, 3H), 7.58 (ddd,  $J$  = 8.3, 6.8, 1.3 Hz, 1H), 7.51 (ddd,  $J$  = 8.2, 6.8, 1.2 Hz, 1H), 7.40 (d,  $J$  = 7.8 Hz, 1H), 7.35 – 7.30 (m, 2H), 7.29 – 7.20 (m, 3H), 6.74 (d,  $J$  = 7.8 Hz, 1H), 4.52 (s, 2H), 3.00 – 2.94 (m, 2H).

**$^{13}\text{C}$  NMR (126 MHz,  $\text{CD}_3\text{CN}$ ):**  $\delta$  146.89, 137.67, 133.32, 132.34, 129.76, 129.70, 128.02, 127.81, 125.66, 124.37, 124.06, 123.26, 115.81, 108.36, 49.50, 49.41, 32.57.

**HRMS (ESI/Q-TOF):**  $[\text{M}+\text{H}]^+$  calculated for  $\text{C}_{19}\text{H}_{21}\text{N}_2^+$  277.1699, found 277.1749.

**IR (Film):** 3382, 2674, 2314, 2121, 1794, 1682, 1415, 1275, 1189, 1014  $\text{cm}^{-1}$ .

## **Phenethylamine Release Studies**

### **General Release Study Procedure**

The phenethylamine conjugate was first dissolved in MeOH as a 10 mM solution. Each aliquot was diluted to a final concentration of 5 mM with 0.1 M Tris buffer (pH 7.4). Then it was immediately analyzed on the analytical HPLC to determine the amount of phenethylamine release using a phenethylamine standard curve (254 nm area under the curve (AUC) vs. concentration). Each sample was prepared immediately prior to the first injection to ensure a consistent starting point across the three separate repeats.

### Phenethylamine Standard Curve

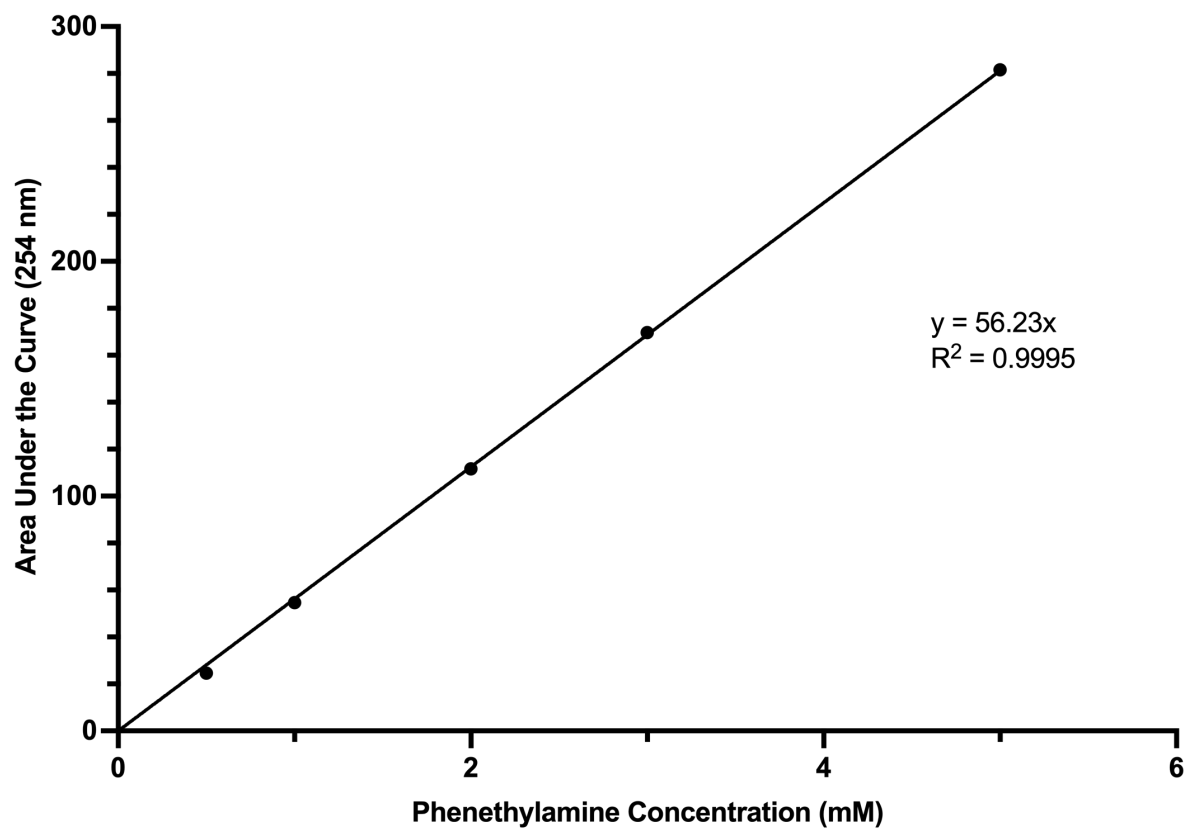

**Figure S1.** Phenethylamine Standard Curve –  $n = 3$ , error bars represent standard deviation but are smaller than the size of the markers. Area under the curve measured with 4.00  $\mu\text{L}$  injections.

## Phenethylamine Release From 1

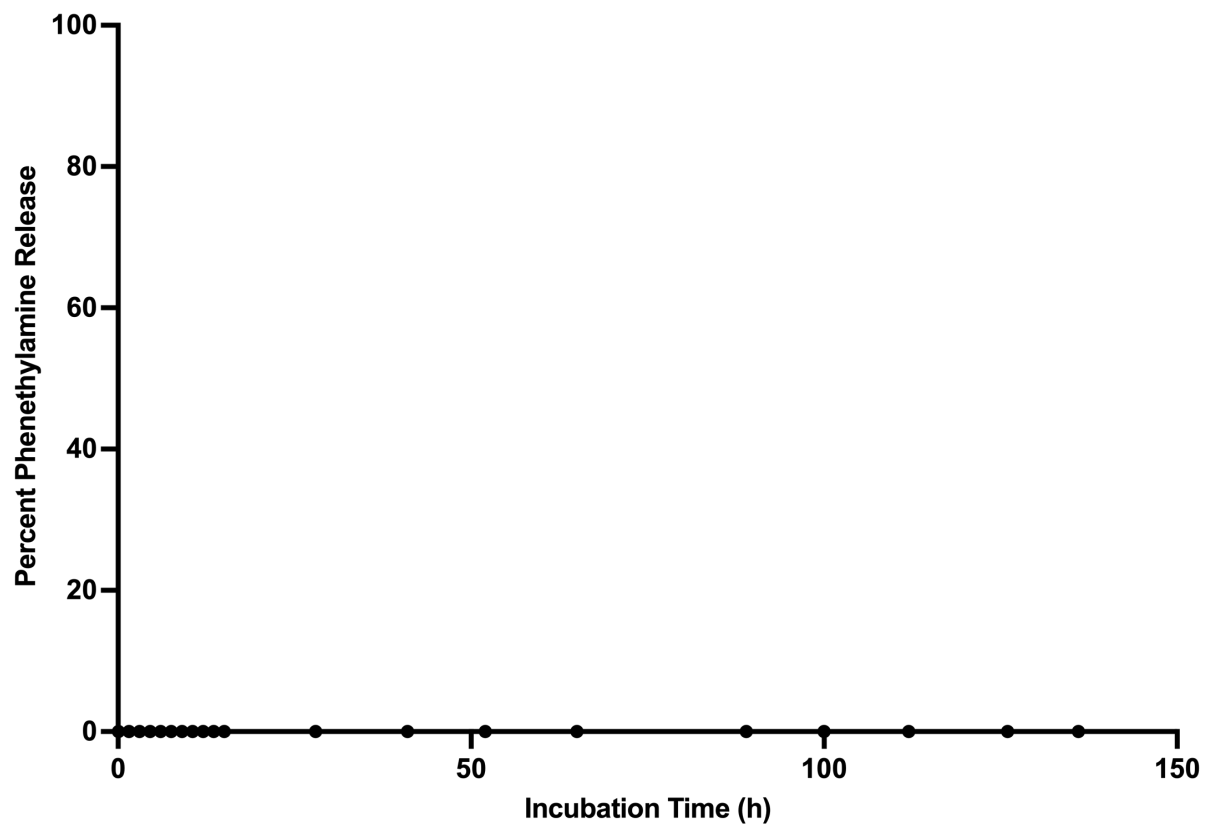

**Figure S2.** Phenethylamine release from 1 –  $n = 3$ , error bars represent standard deviation but are smaller than the size of the markers.

### Phenethylamine Release From 2a

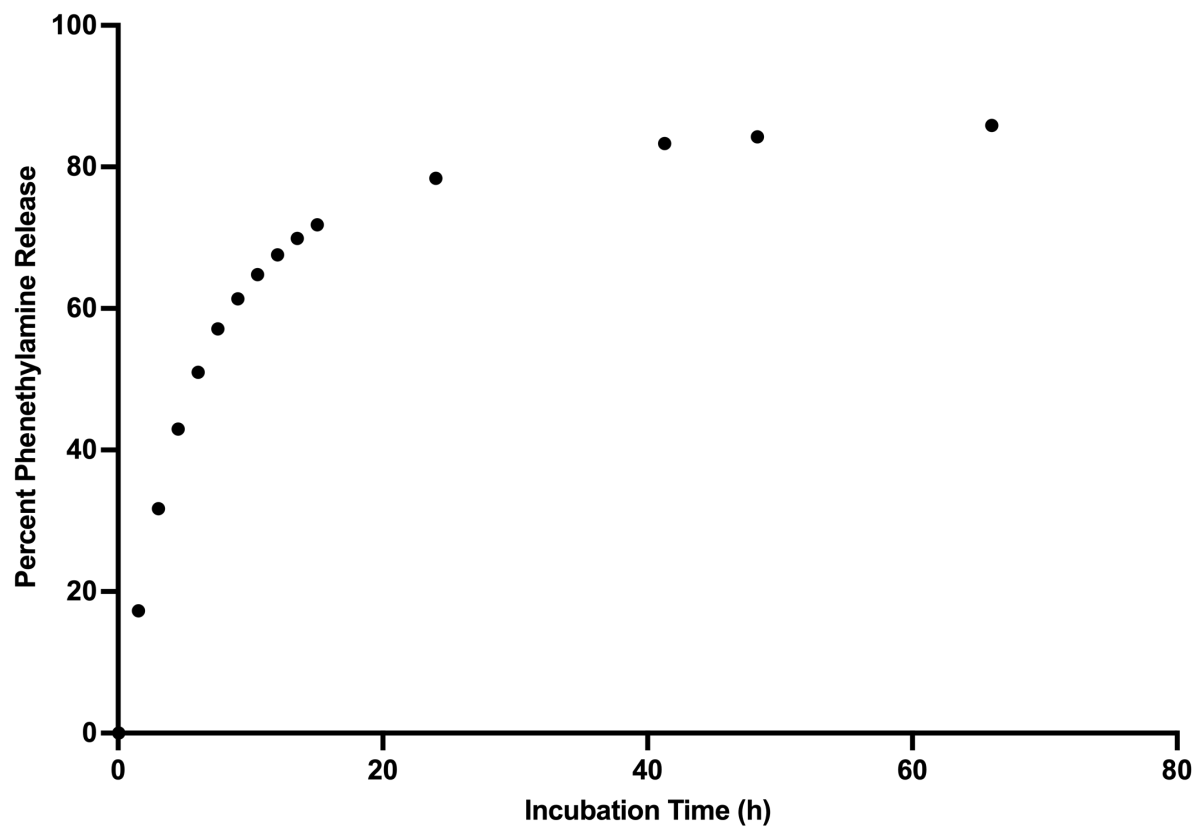

**Figure S3.** Phenethylamine release from **2a** –  $n = 3$ , error bars represent standard deviation but are smaller than the size of the markers.

### Phenethylamine Release From 2b

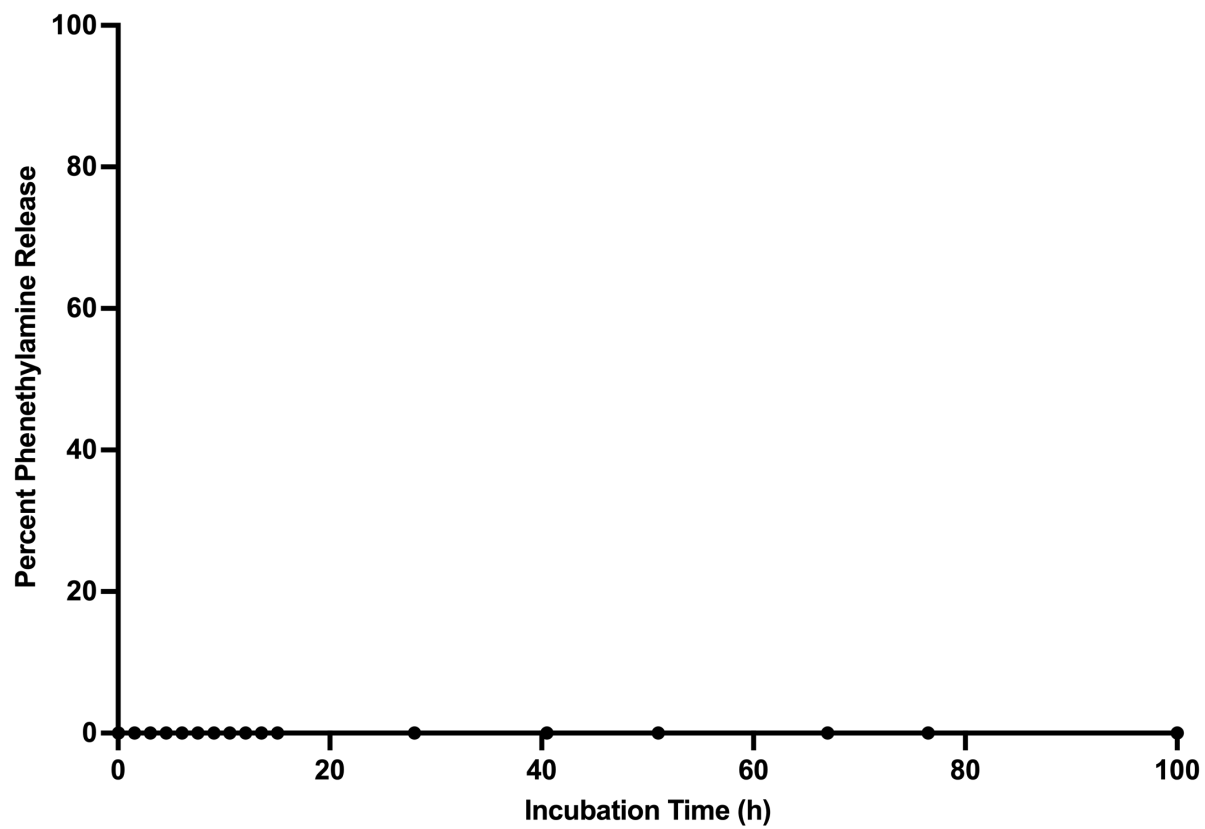

**Figure S4.** Phenethylamine release from **2b** –  $n = 3$ , error bars represent standard deviation but are smaller than the size of the markers.

### Phenethylamine Release From 3a

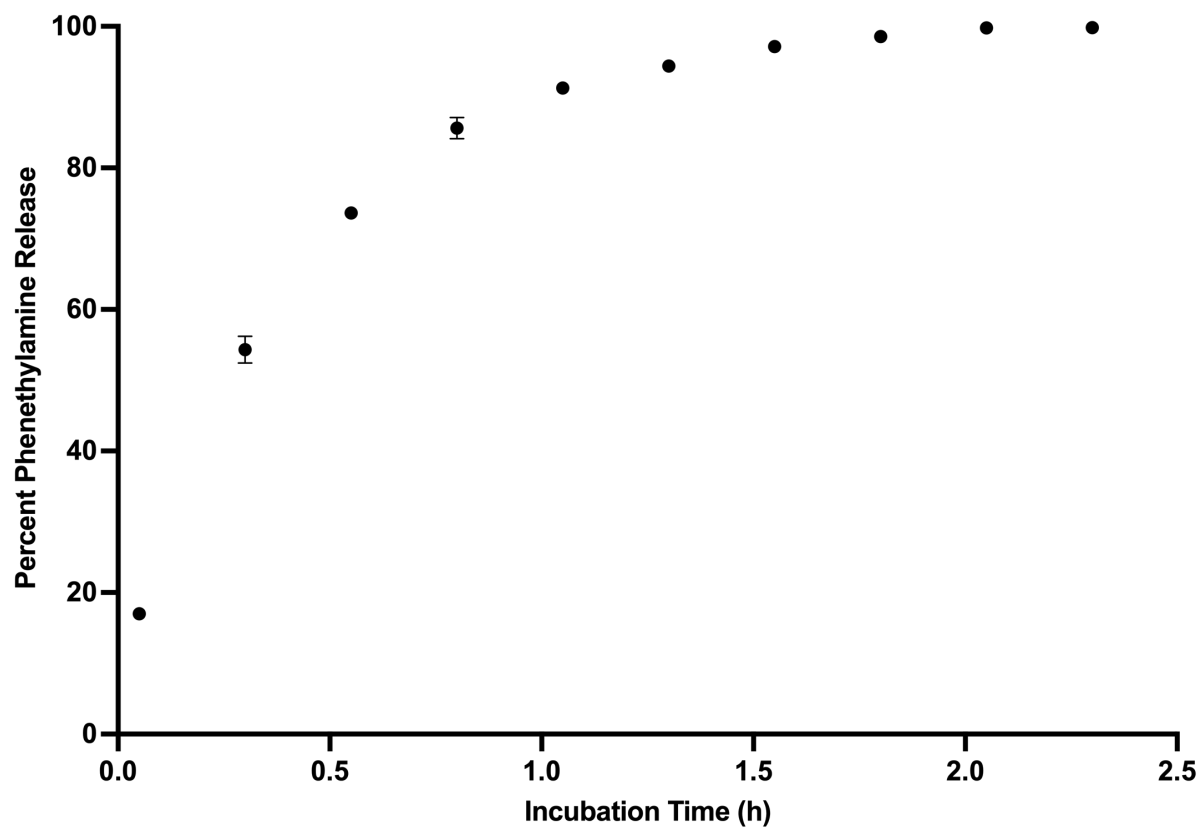

**Figure S5.** Phenethylamine release from **3a** –  $n = 3$ , error bars represent standard deviation but some are smaller than the size of the markers.

### Phenethylamine Release From 3b

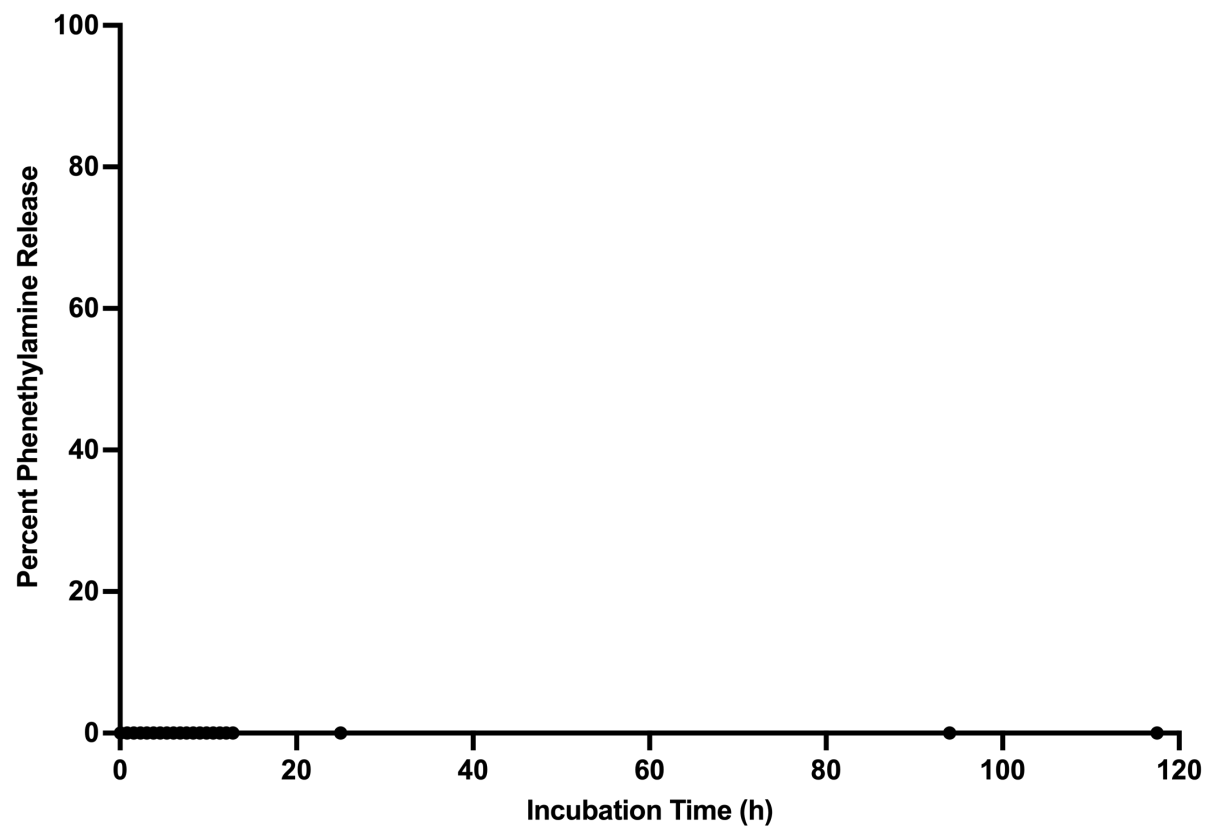

**Figure S6.** Phenethylamine release from **3b** –  $n = 3$ , error bars represent standard deviation but are smaller than the size of the markers.



## Phenethylamine Release From 9

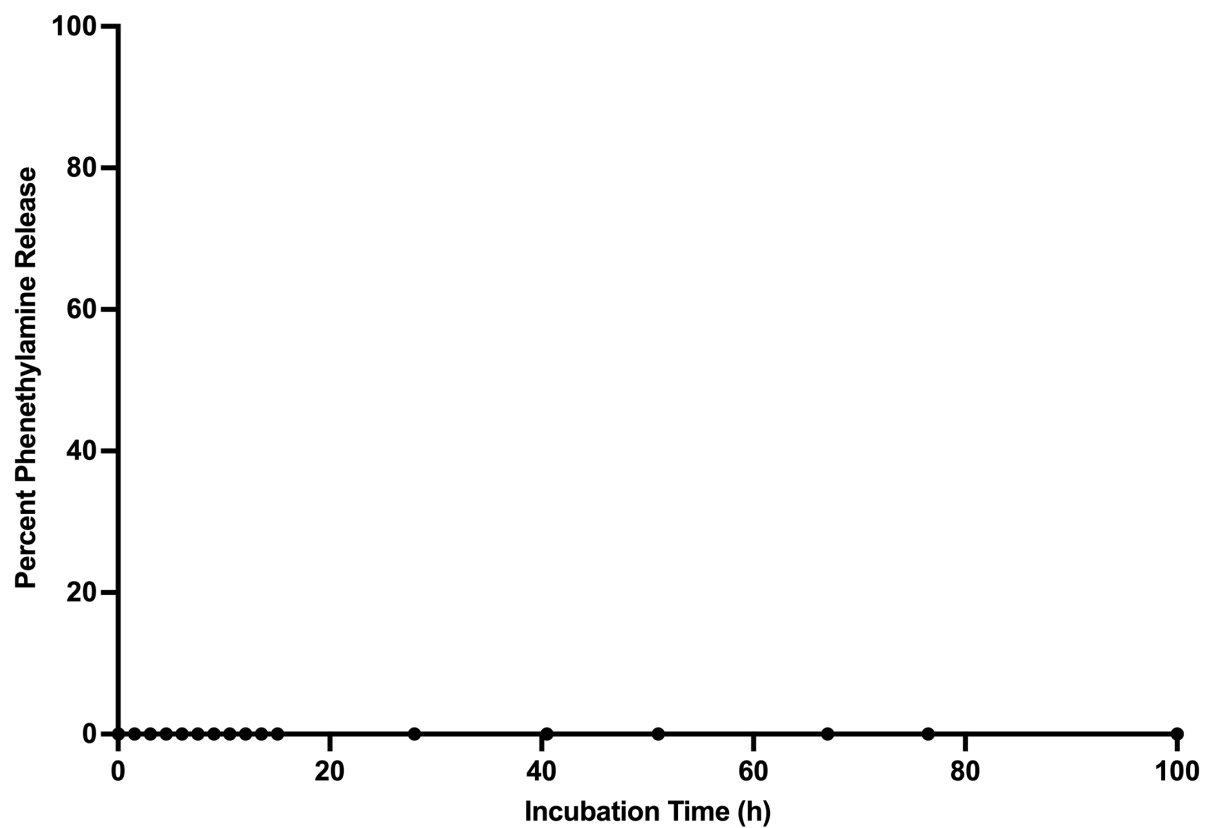

**Figure S7.** Phenethylamine release from **9** –  $n = 3$ , error bars represent standard deviation but are smaller than the size of the markers.

## Phenethylamine Release From 10

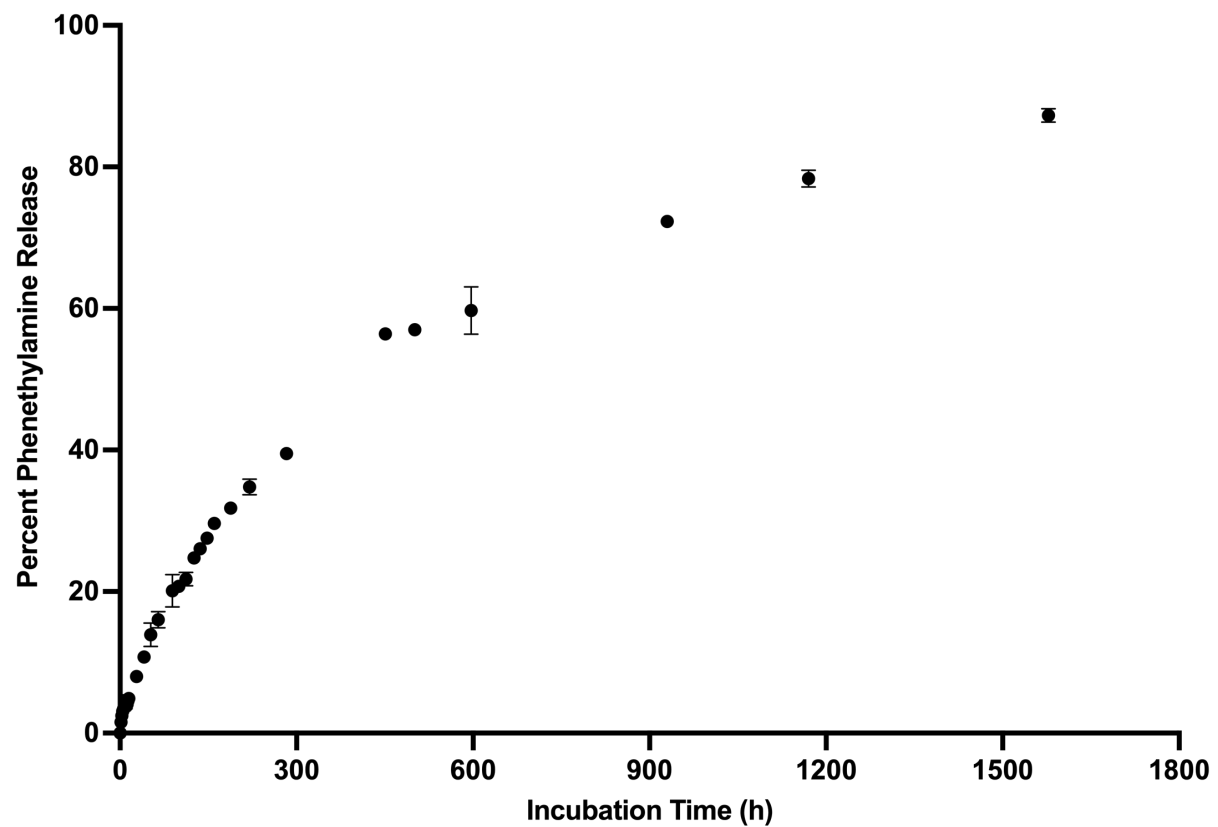

**Figure S8.** Phenethylamine release from **10** –  $n = 3$ , error bars represent standard deviation but some are smaller than the size of the markers.

## Phenethylamine Release From 11

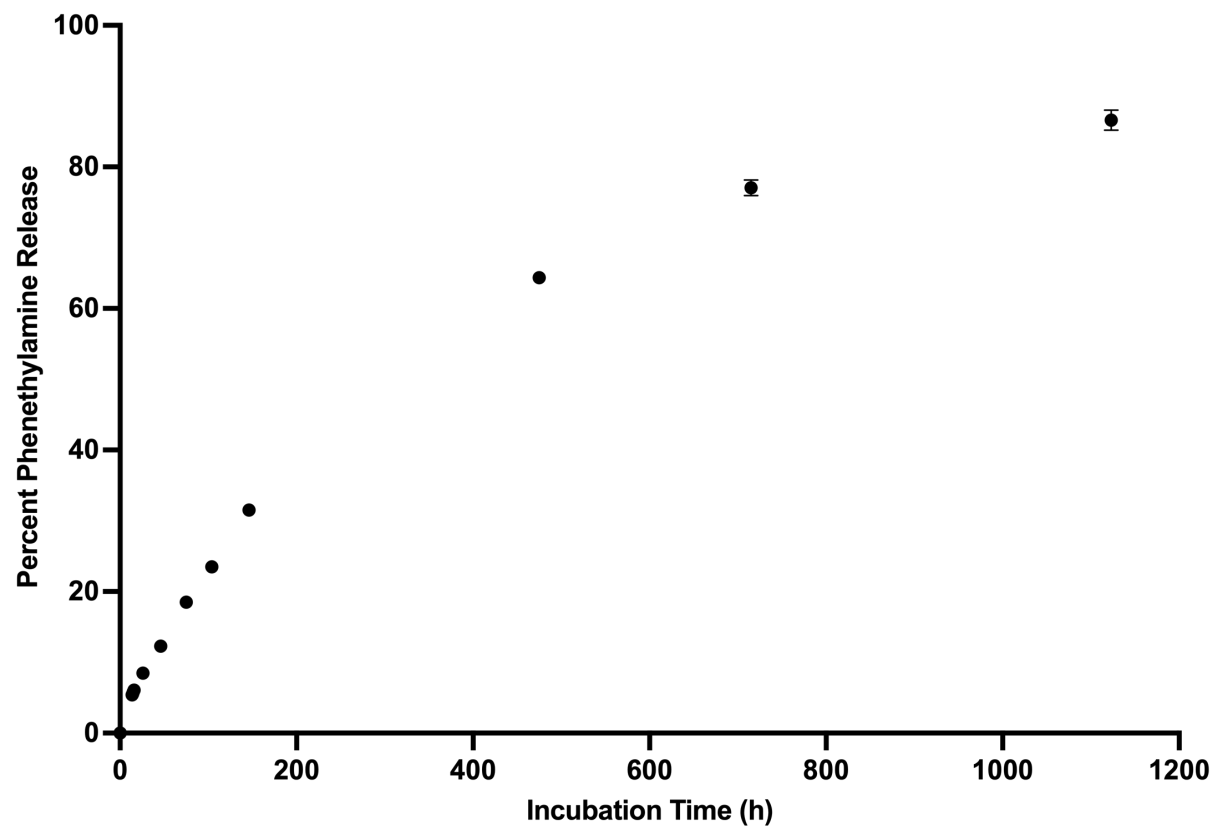

**Figure S9.** Phenethylamine release from **11** –  $n = 3$ , error bars represent standard deviation but some are smaller than the size of the markers.

# NMR Spectra

## Compound 1 <sup>1</sup>H NMR

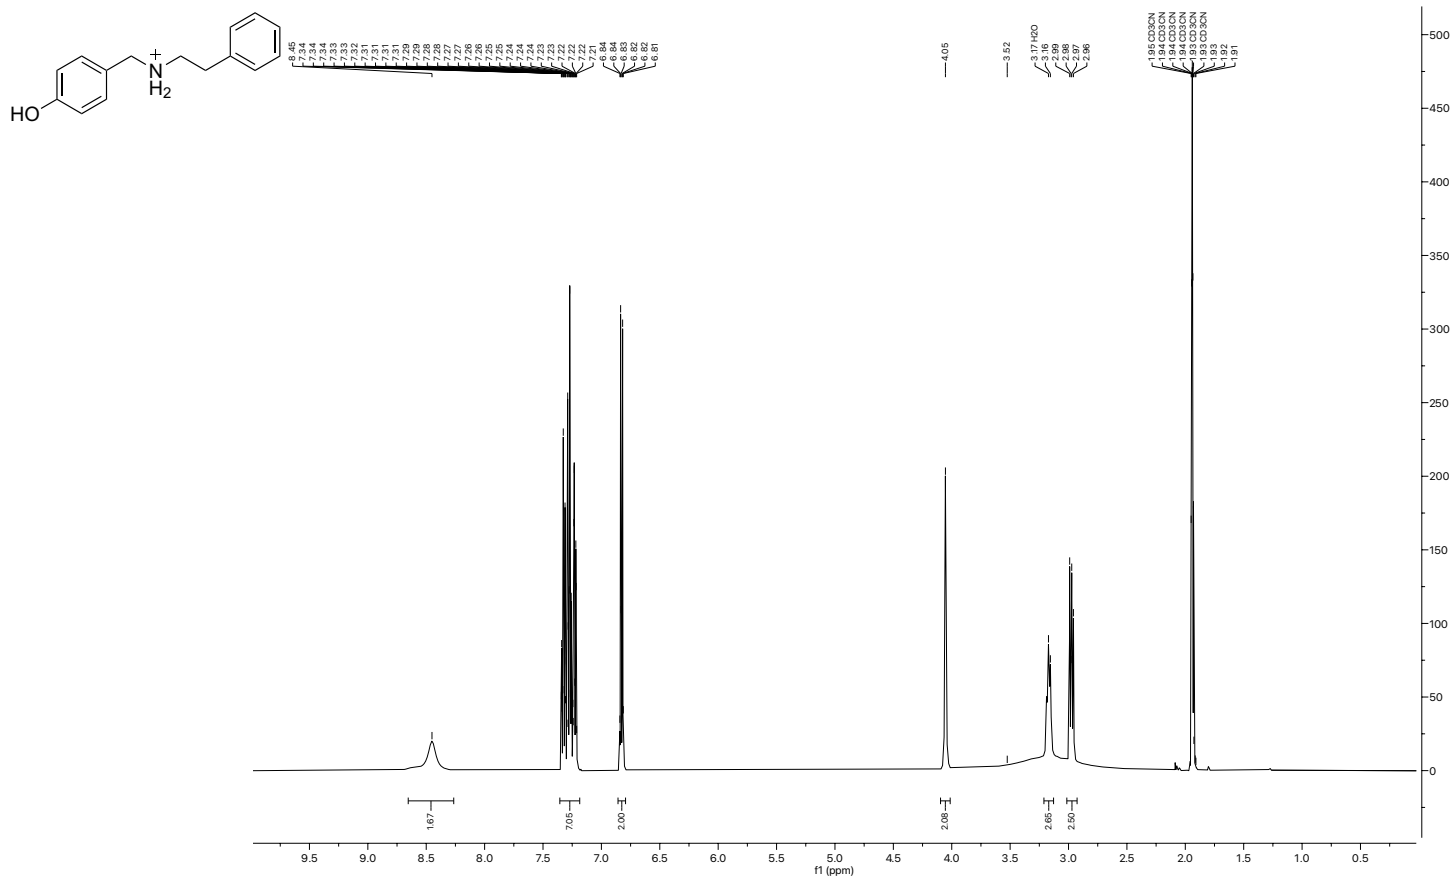

Figure S10. <sup>1</sup>H NMR of 1 in CD<sub>3</sub>CN at 298 K.

# Compound 1 <sup>13</sup>C NMR

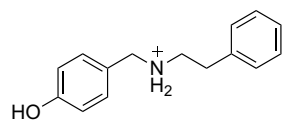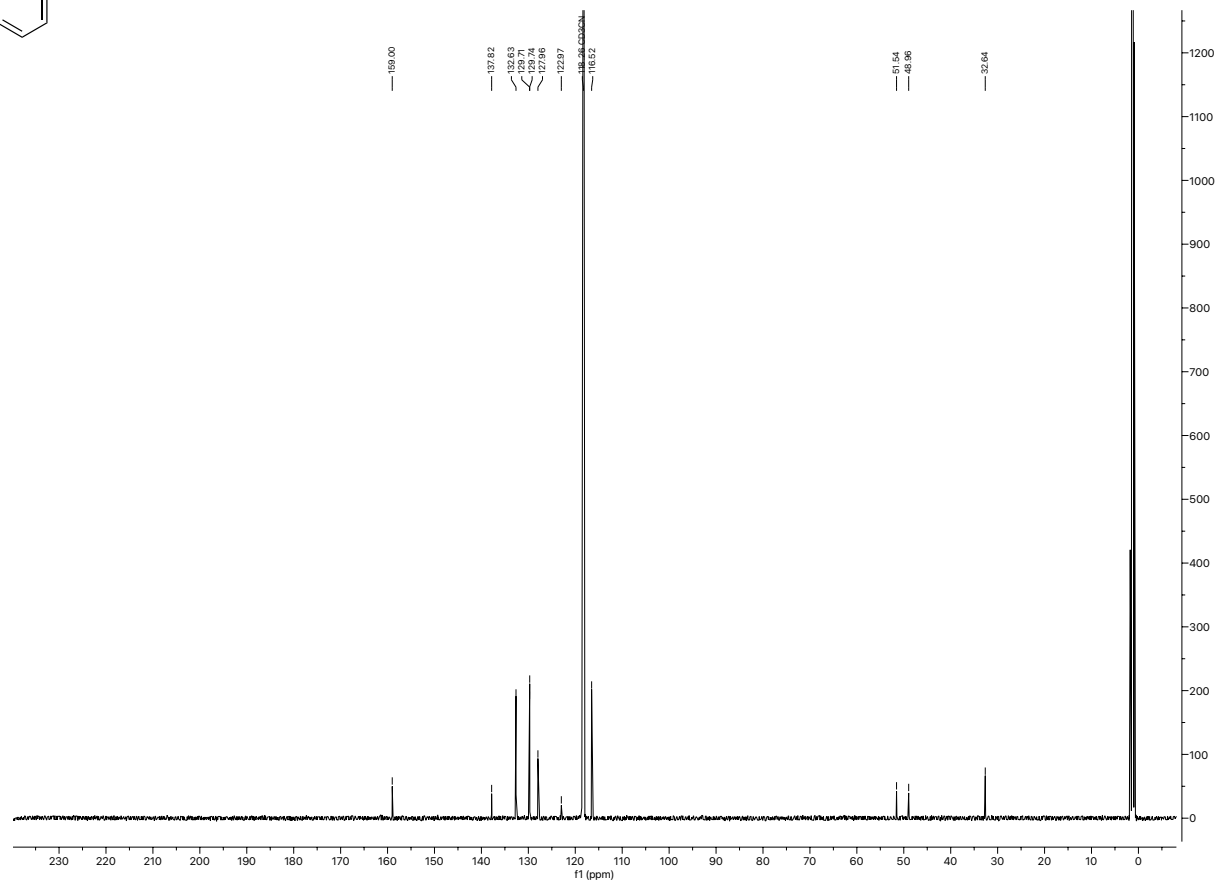

Figure S11. <sup>13</sup>C NMR of 1 in CD<sub>3</sub>CN at 298 K.

# Compound 2a <sup>1</sup>H NMR

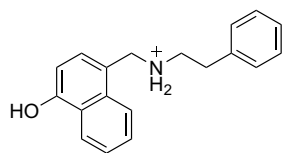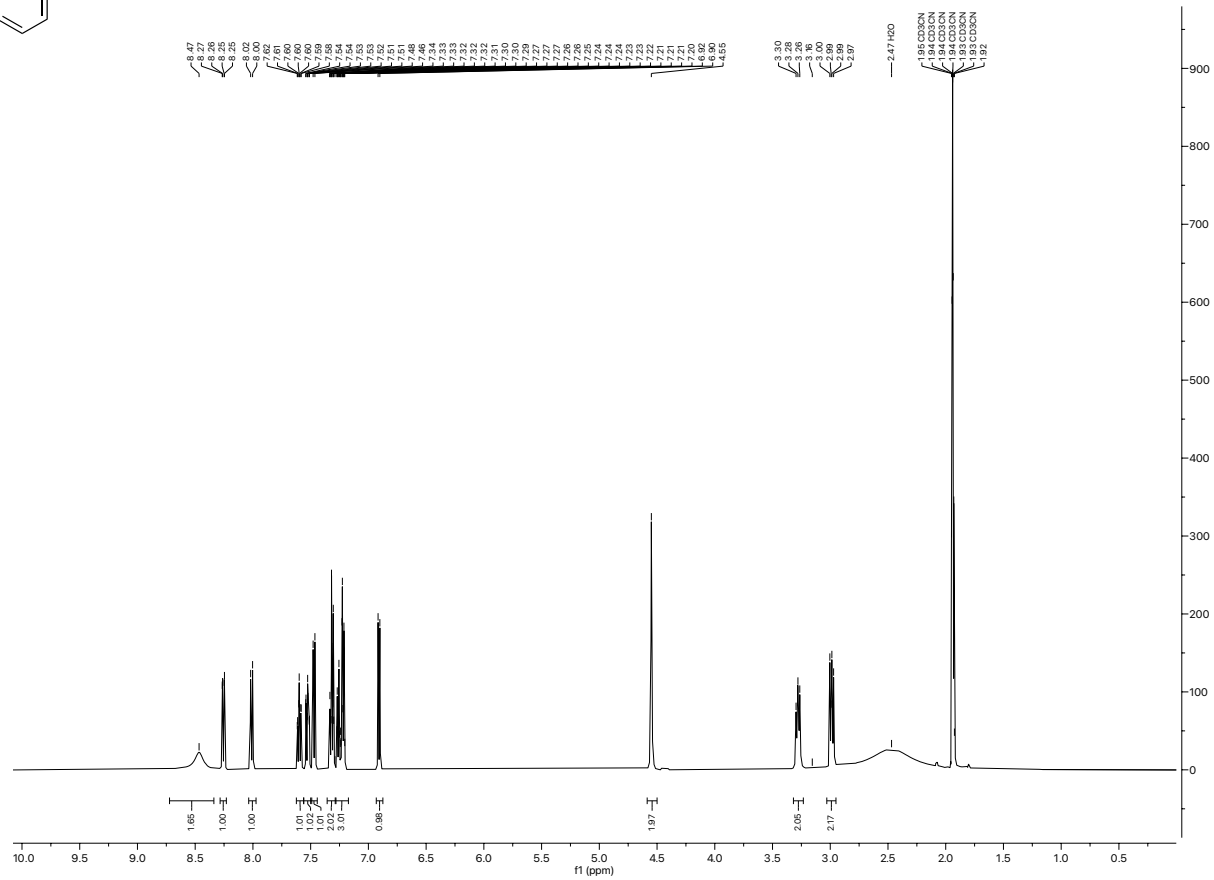

Figure S12. <sup>1</sup>H NMR of 2a in CD<sub>3</sub>CN at 298 K.

# Compound 2a <sup>13</sup>C NMR

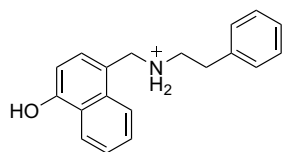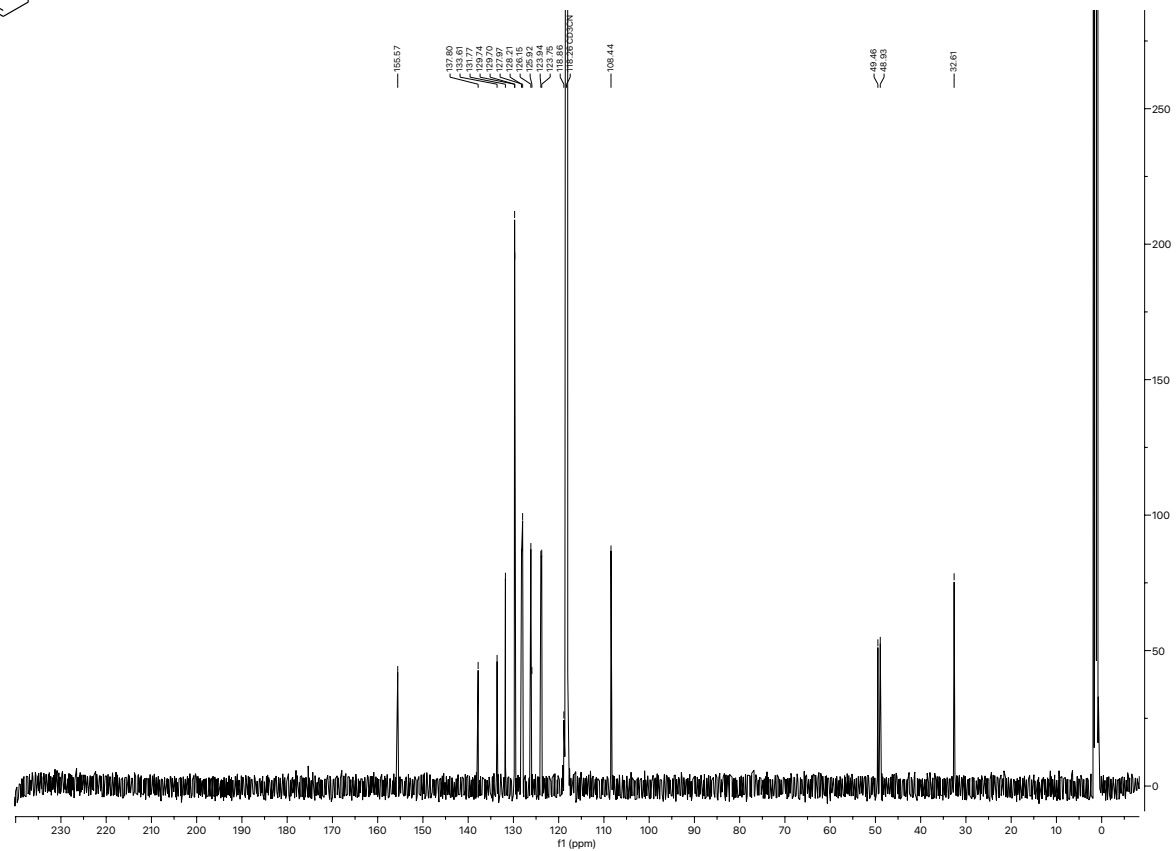

# Compound 12 <sup>1</sup>H NMR

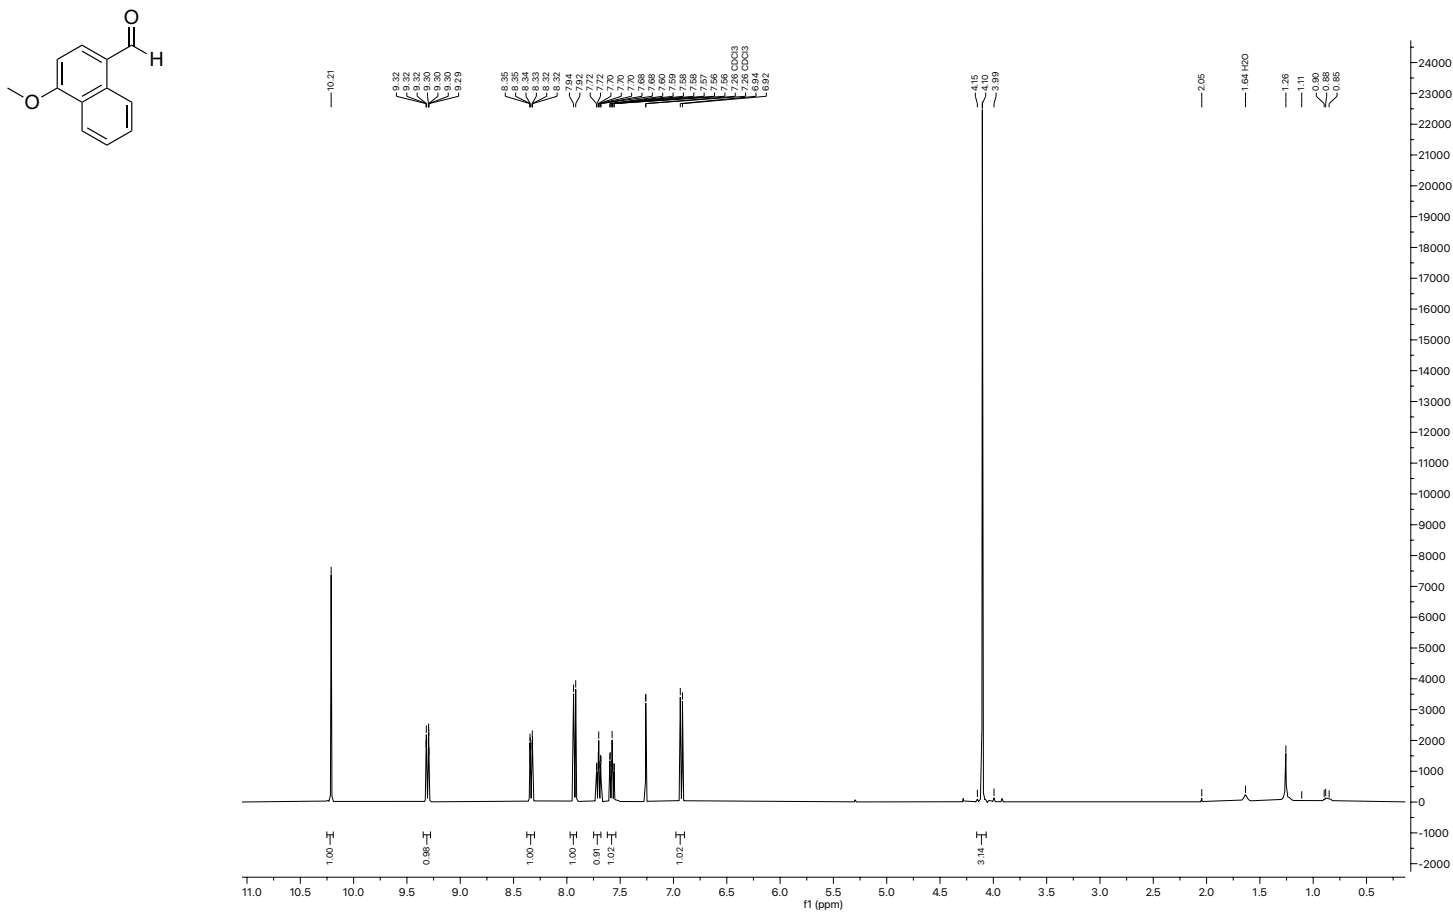

Figure S14. <sup>1</sup>H NMR of 12 in CDCl<sub>3</sub> at 298 K.



# Compound 12 <sup>13</sup>C NMR

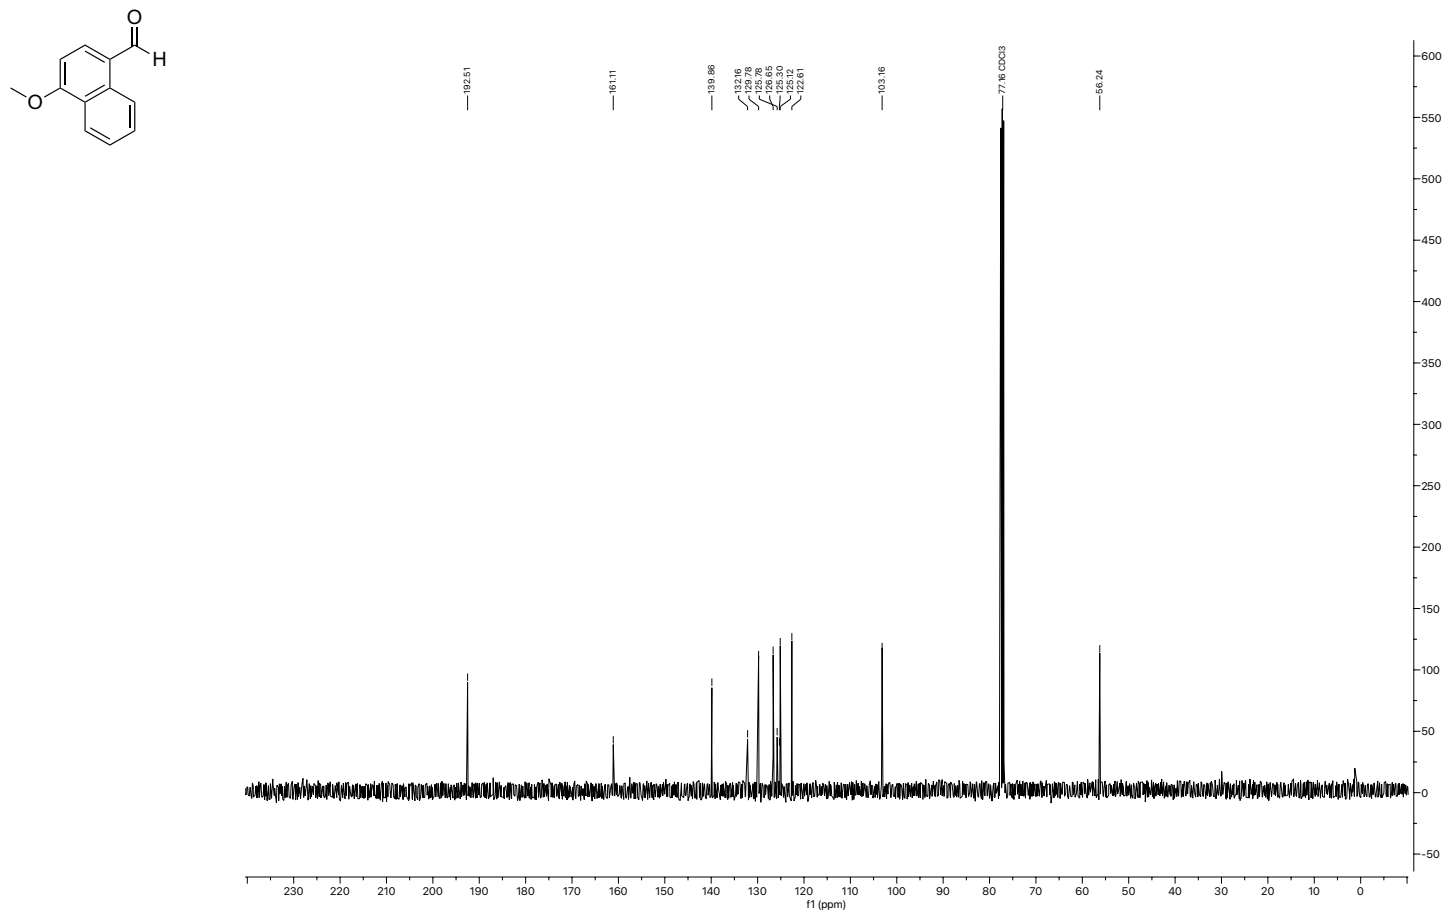

Figure S15. <sup>13</sup>C NMR of 12 in CDCl<sub>3</sub> at 298 K.



# Compound 2b <sup>13</sup>C NMR

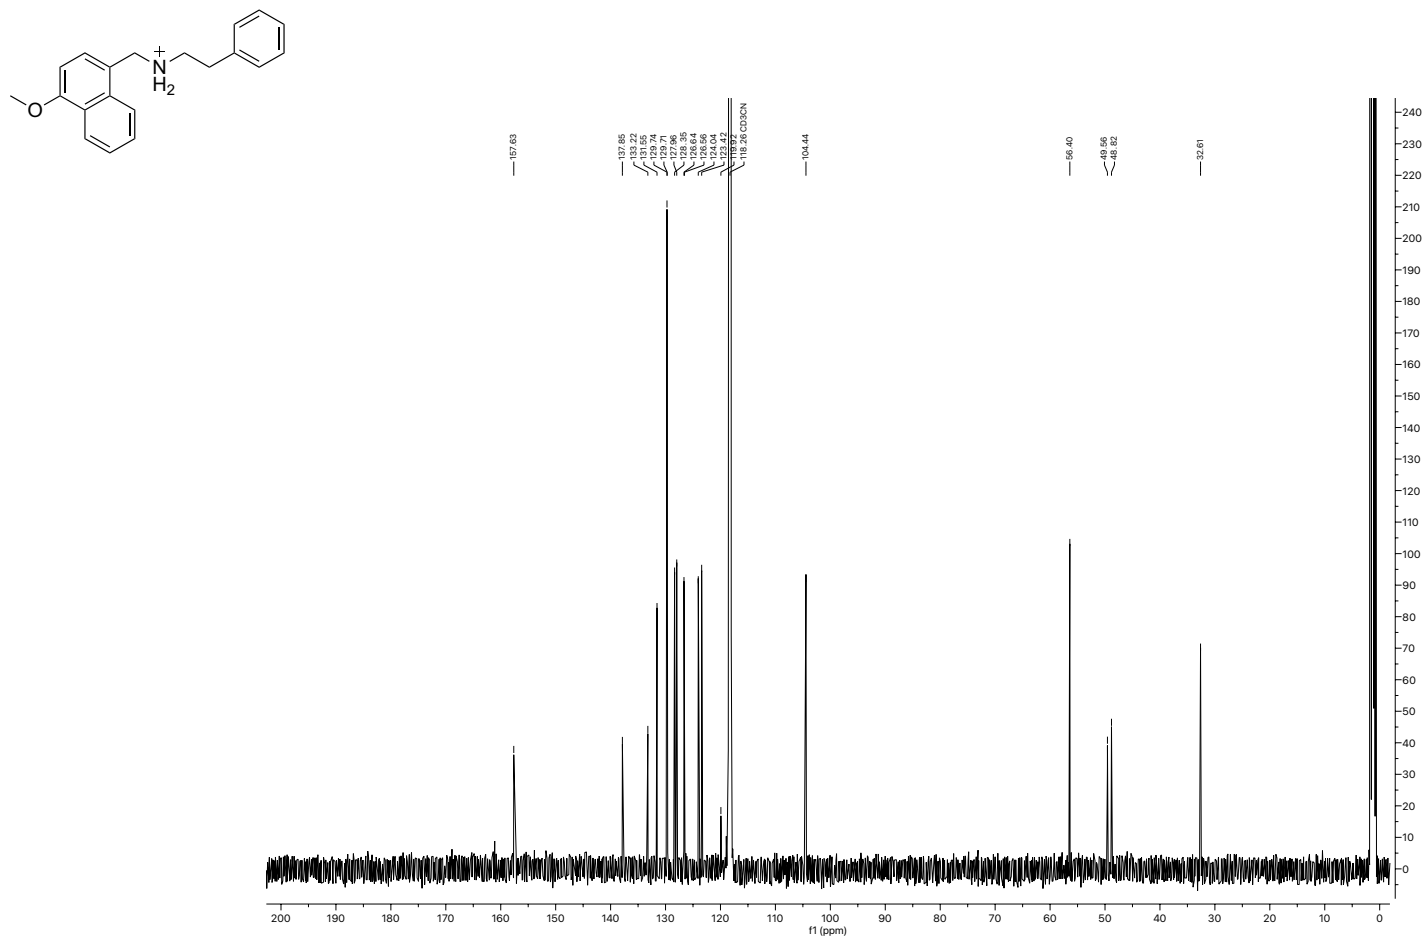

Figure S17. <sup>13</sup>C NMR of 2b in CD<sub>3</sub>CN at 298 K.

# Compound 4 <sup>1</sup>H NMR

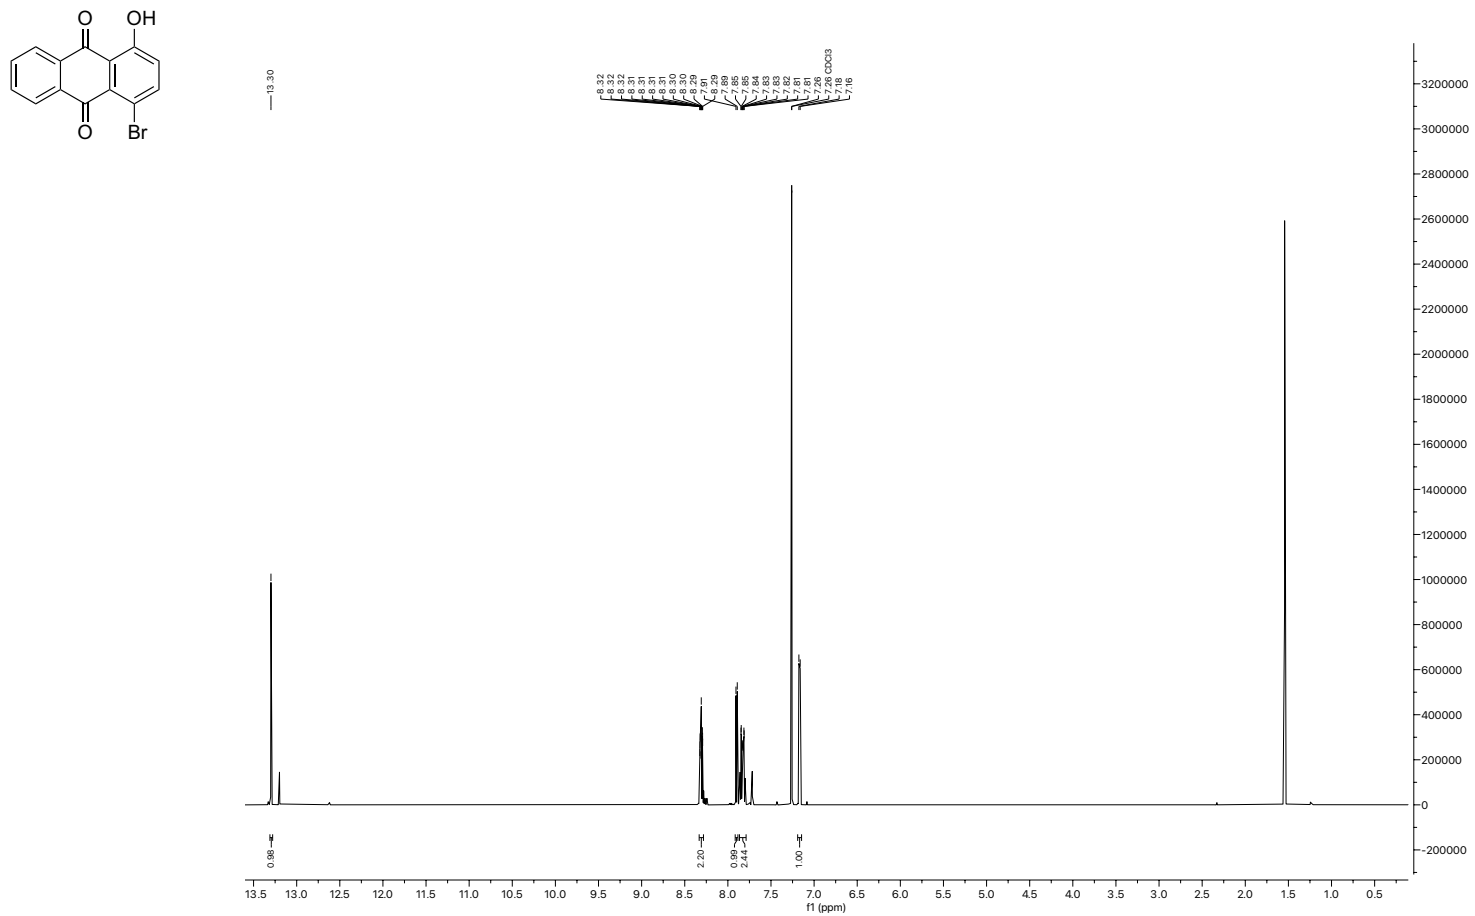

Figure S18. <sup>1</sup>H NMR of 4 in CDCl<sub>3</sub> at 298 K.

# Compound 4 <sup>13</sup>C NMR

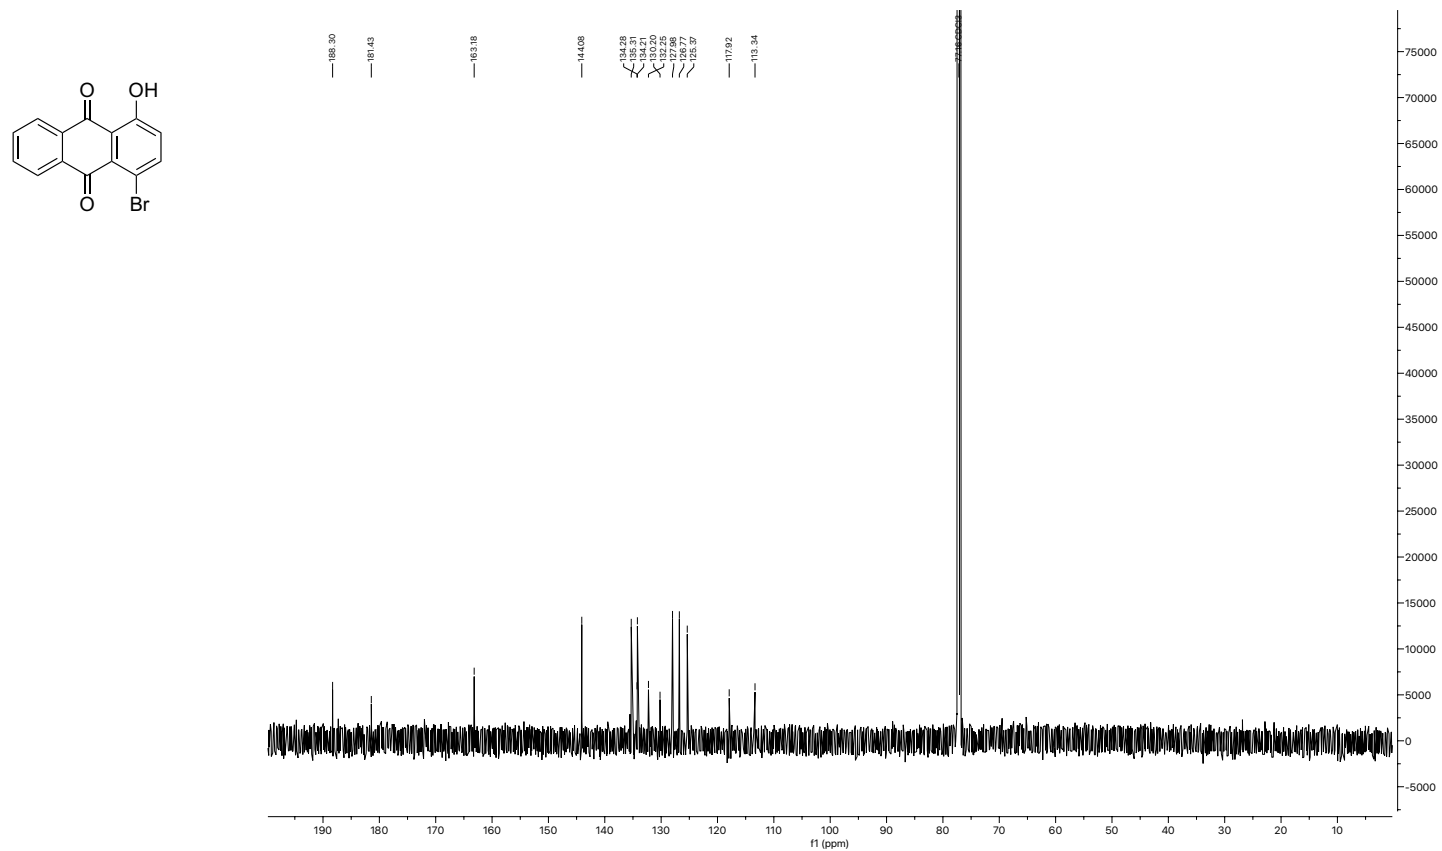

Figure S19. <sup>13</sup>C NMR of 4 in CDCl<sub>3</sub> at 298 K.

# Compound 5 <sup>1</sup>H NMR

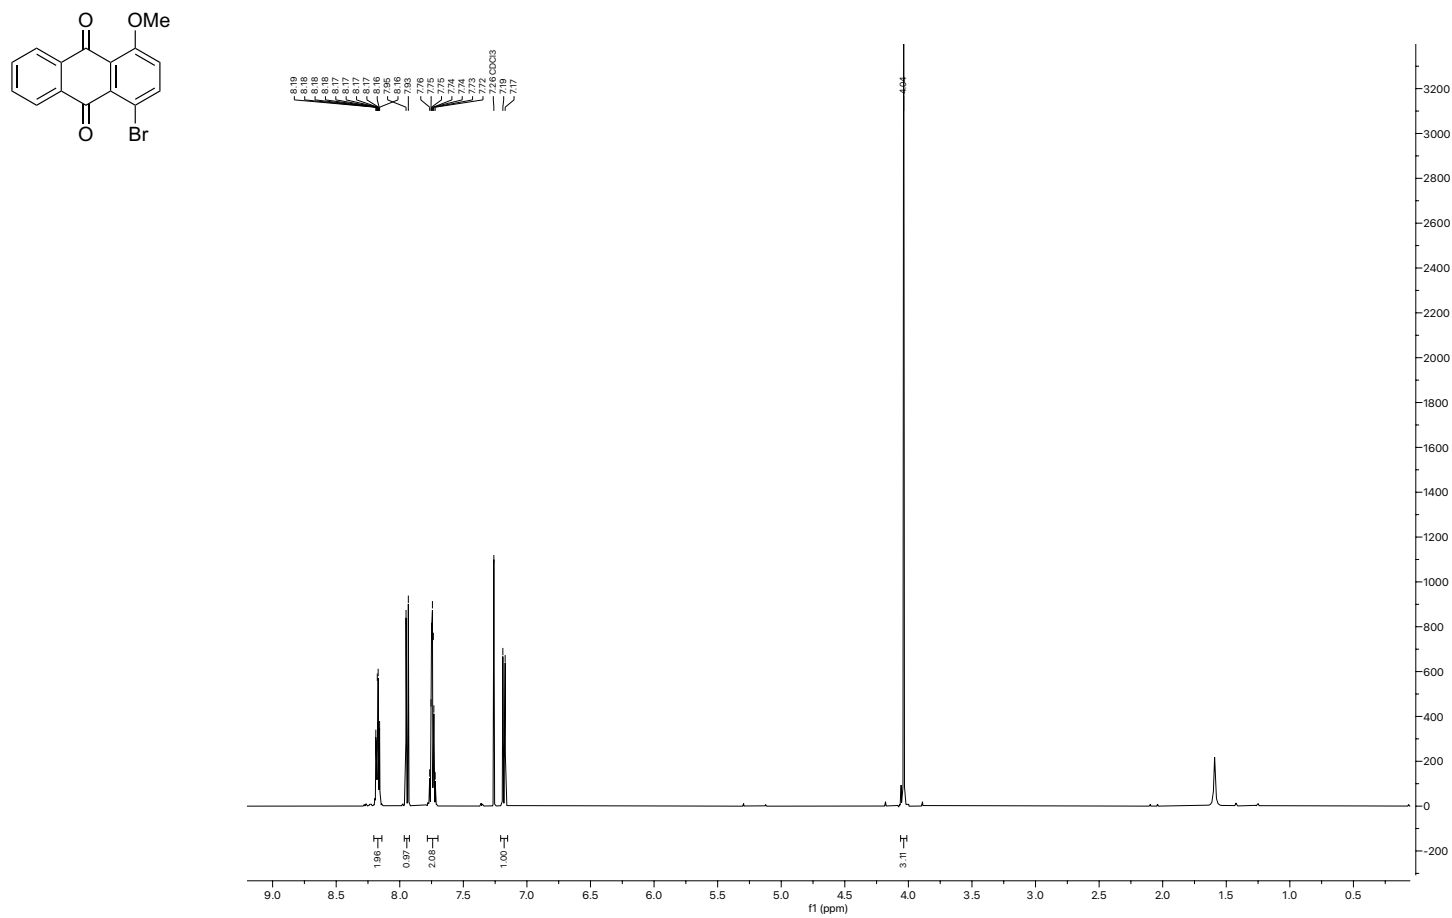

Figure S20. <sup>1</sup>H NMR of 5 in CDCl<sub>3</sub> at 298 K.

# Compound 5 <sup>13</sup>C NMR

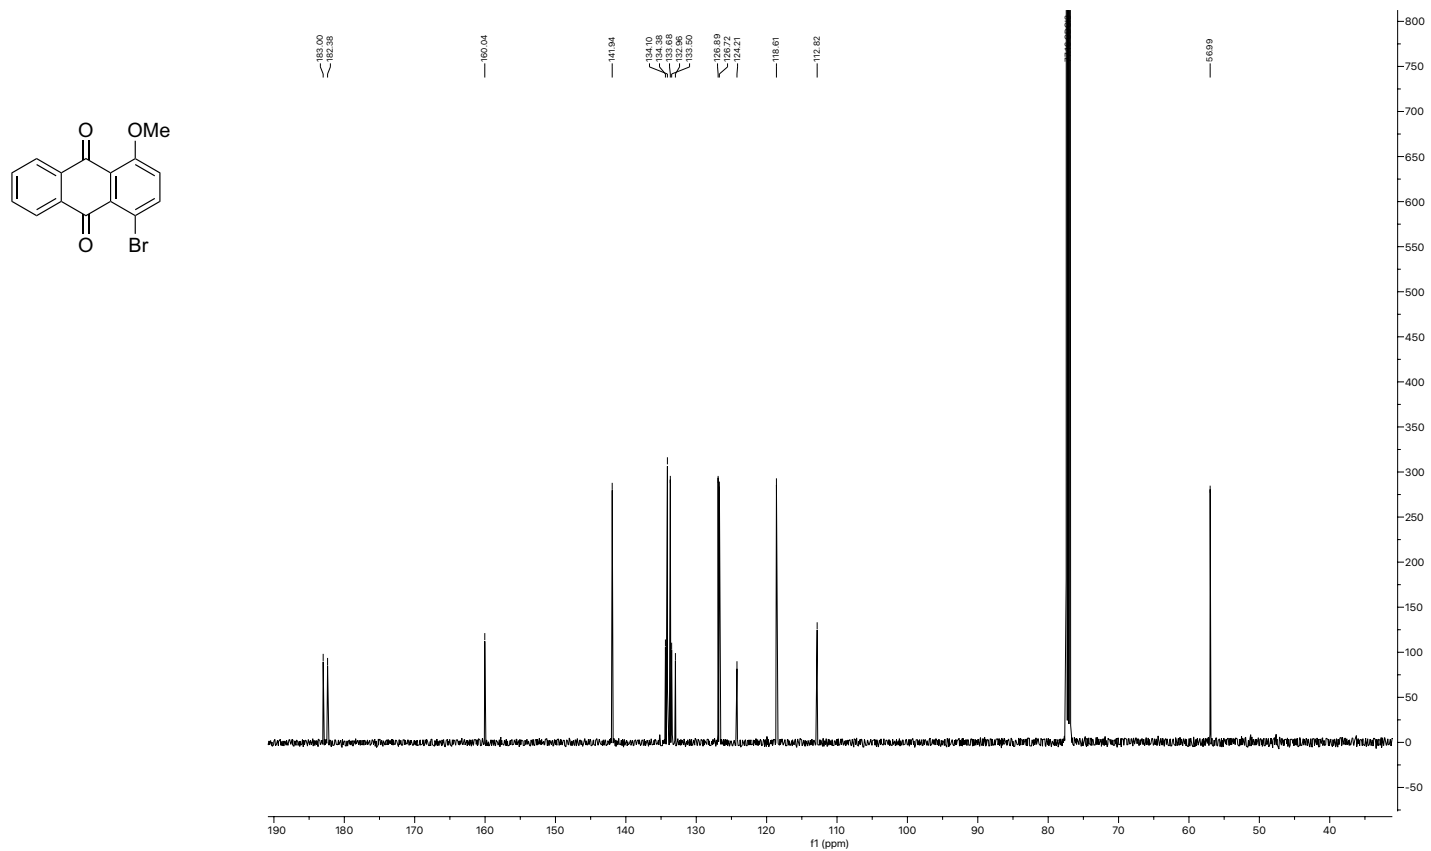

Figure S21. <sup>13</sup>C NMR of 5 in CDCl<sub>3</sub> at 298 K.

# Compound 6 <sup>1</sup>H NMR

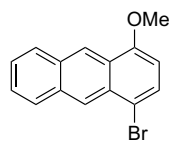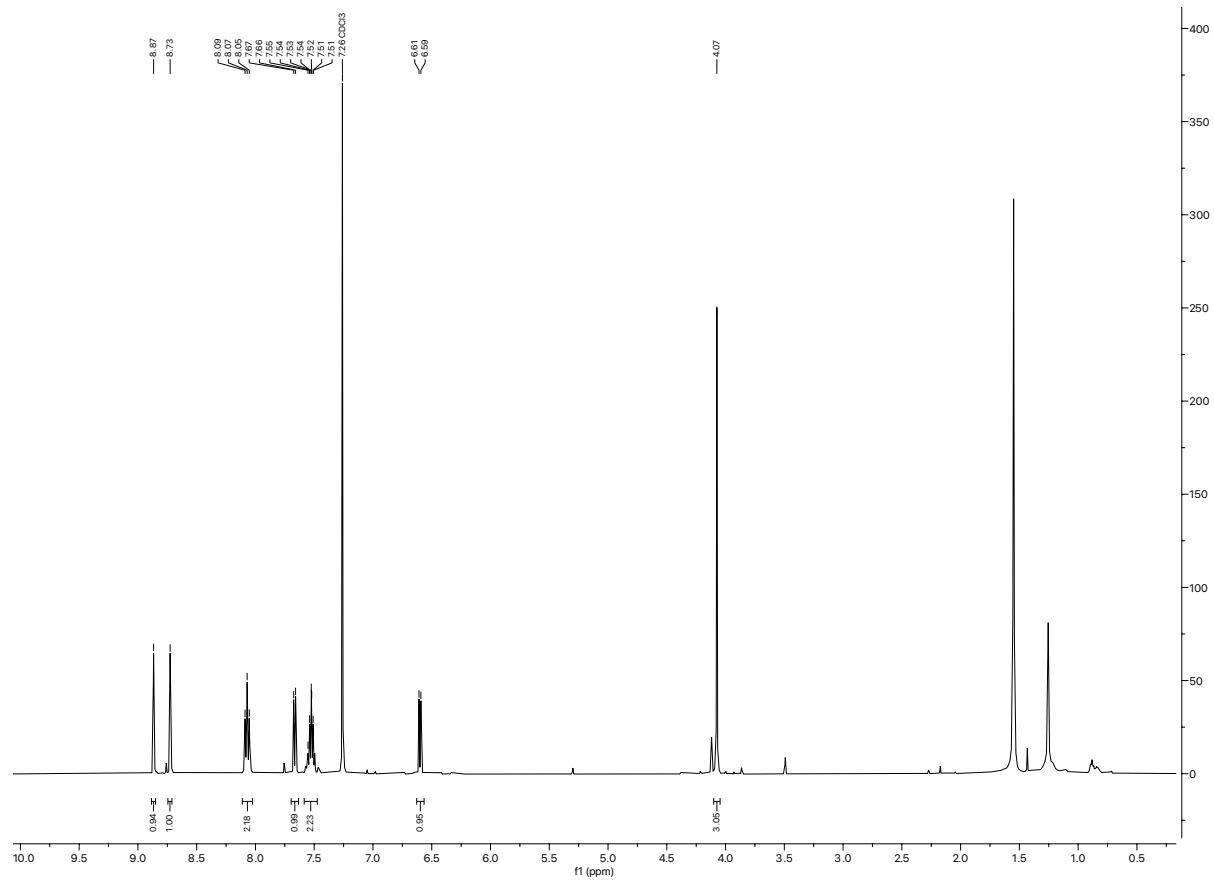

Figure S22. <sup>1</sup>H NMR of 6 in CDCl<sub>3</sub> at 298 K.





# Compound 7 $^1\text{H}$ NMR

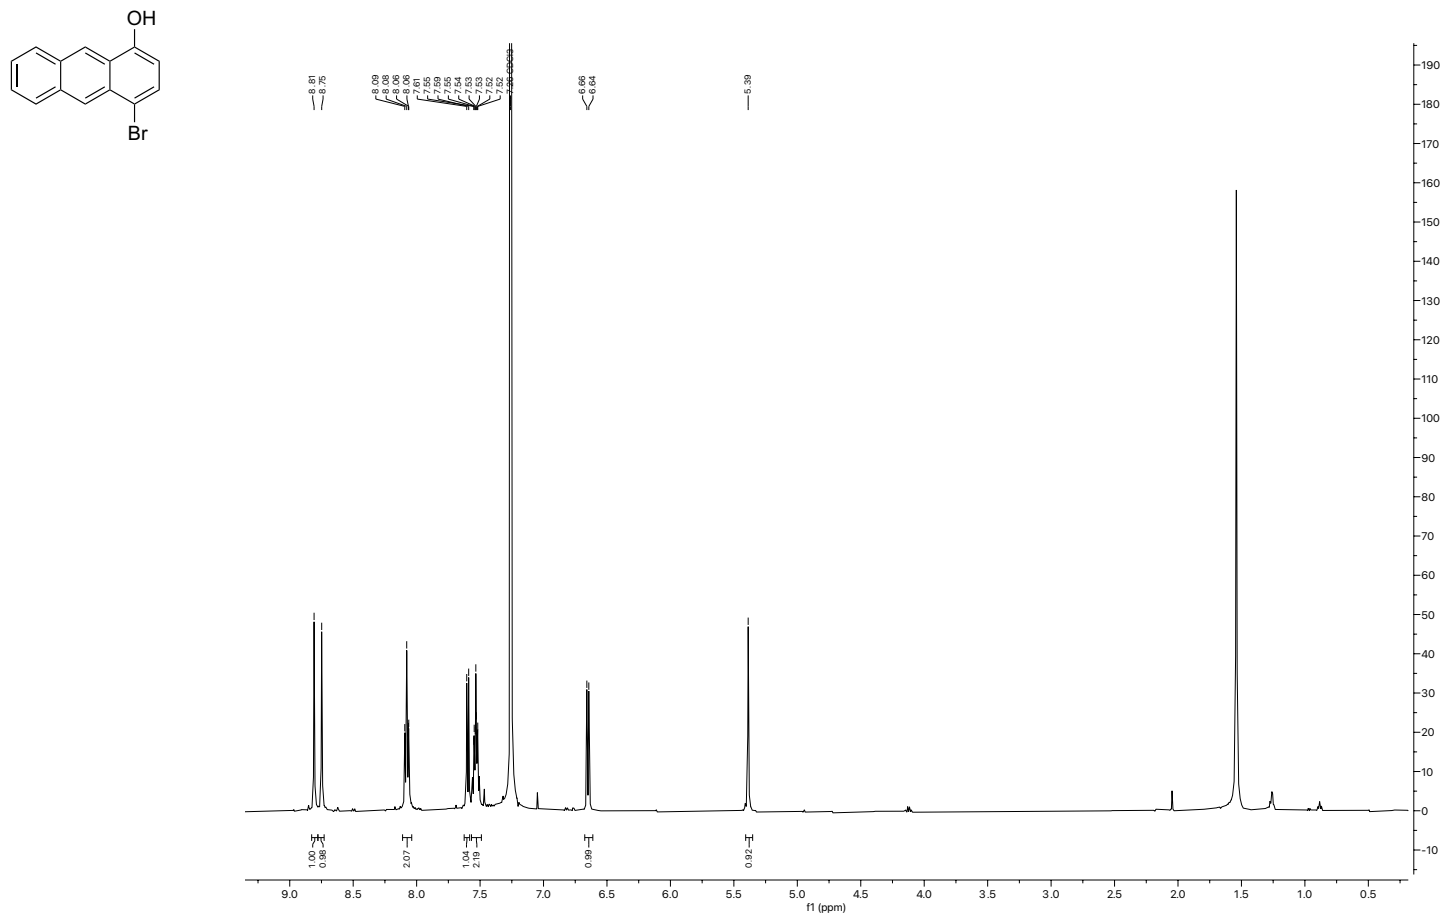

Figure S24.  $^1\text{H}$  NMR of 7 in CDCl<sub>3</sub> at 298 K.

# Compound 7 <sup>13</sup>C NMR

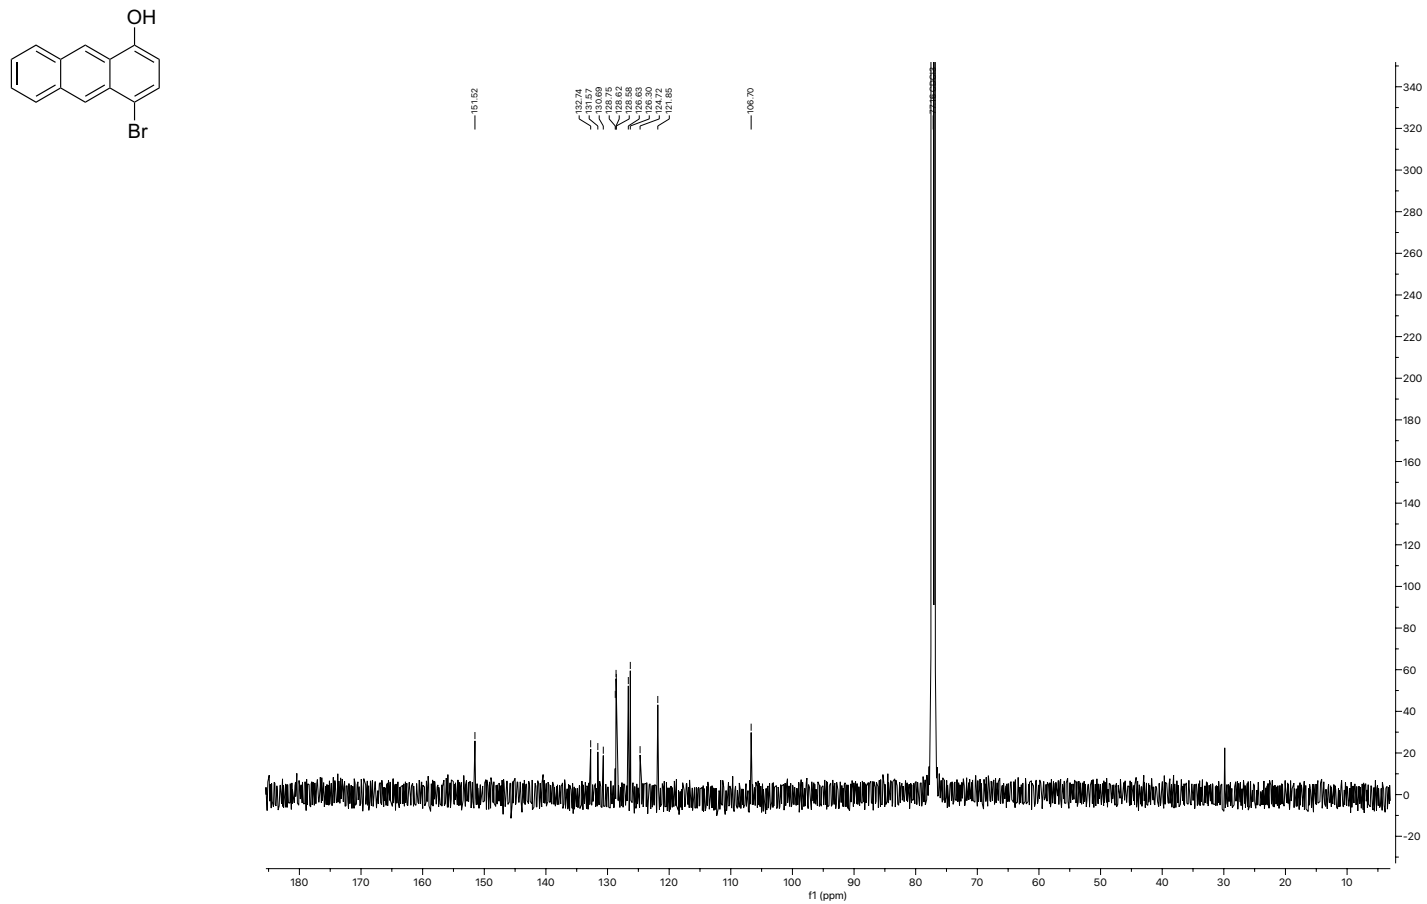

Figure S25. <sup>13</sup>C NMR of 7 in CDCl<sub>3</sub> at 298 K.

# Compound 8 <sup>1</sup>H NMR

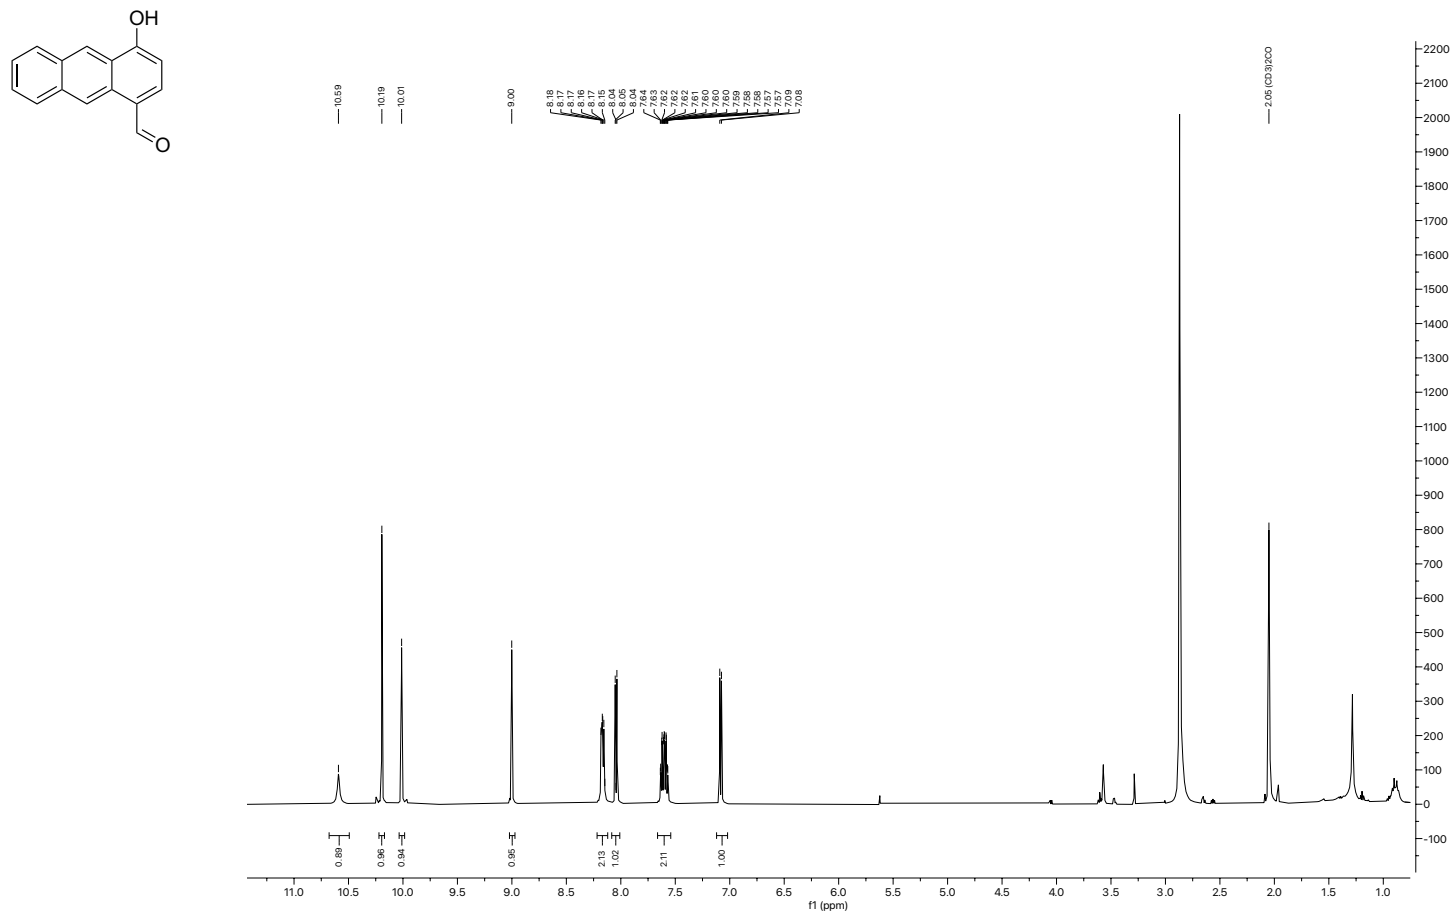

# Compound 8 <sup>13</sup>C NMR

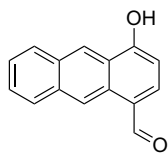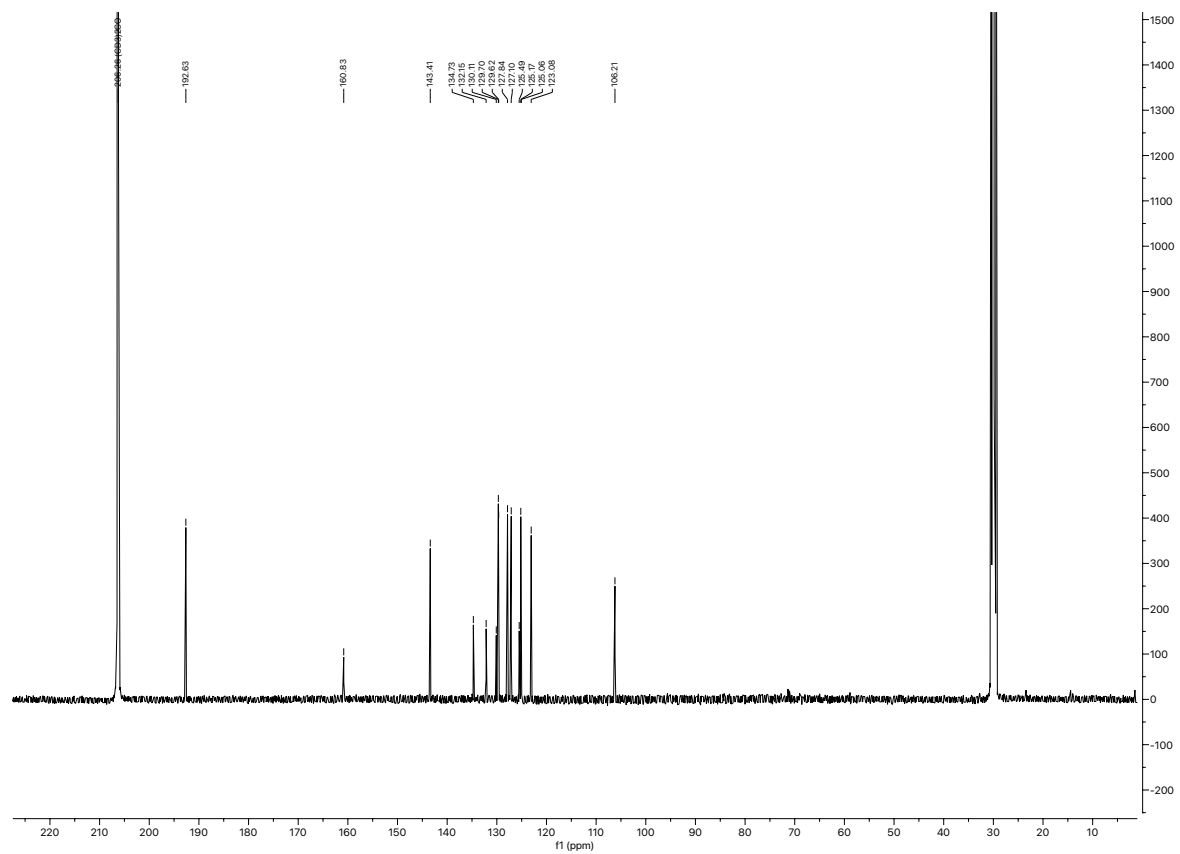

Figure S27. <sup>13</sup>C NMR of 8 in acetone-d<sub>6</sub> at 298 K.

# Compound 3a <sup>1</sup>H NMR

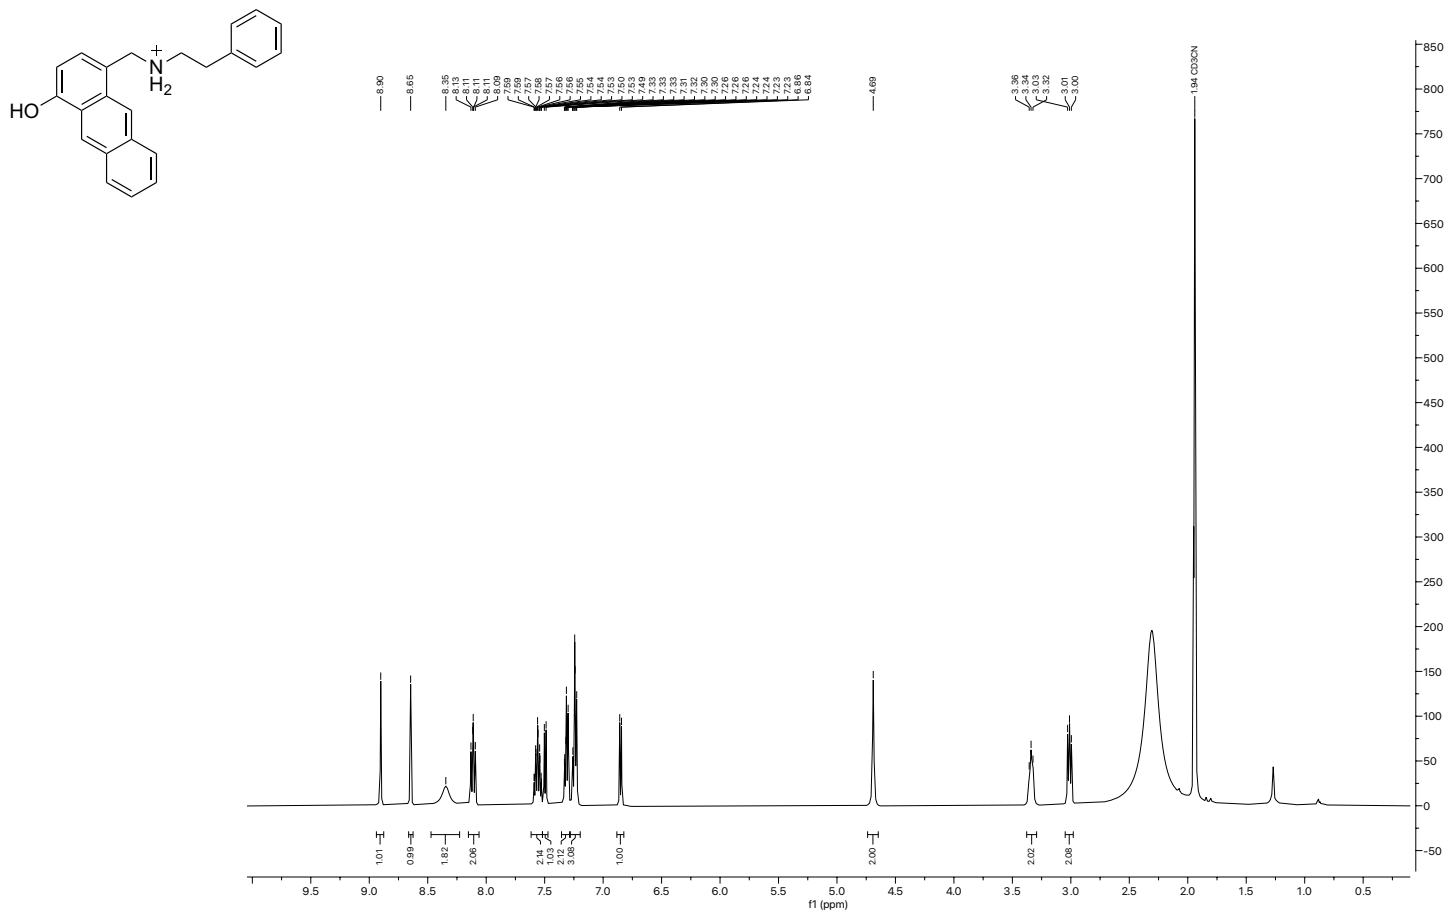

Figure S28. <sup>1</sup>H NMR of 3a in CD<sub>3</sub>CN at 298 K.

# Compound 3a <sup>13</sup>C NMR

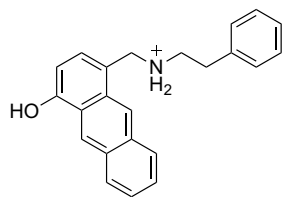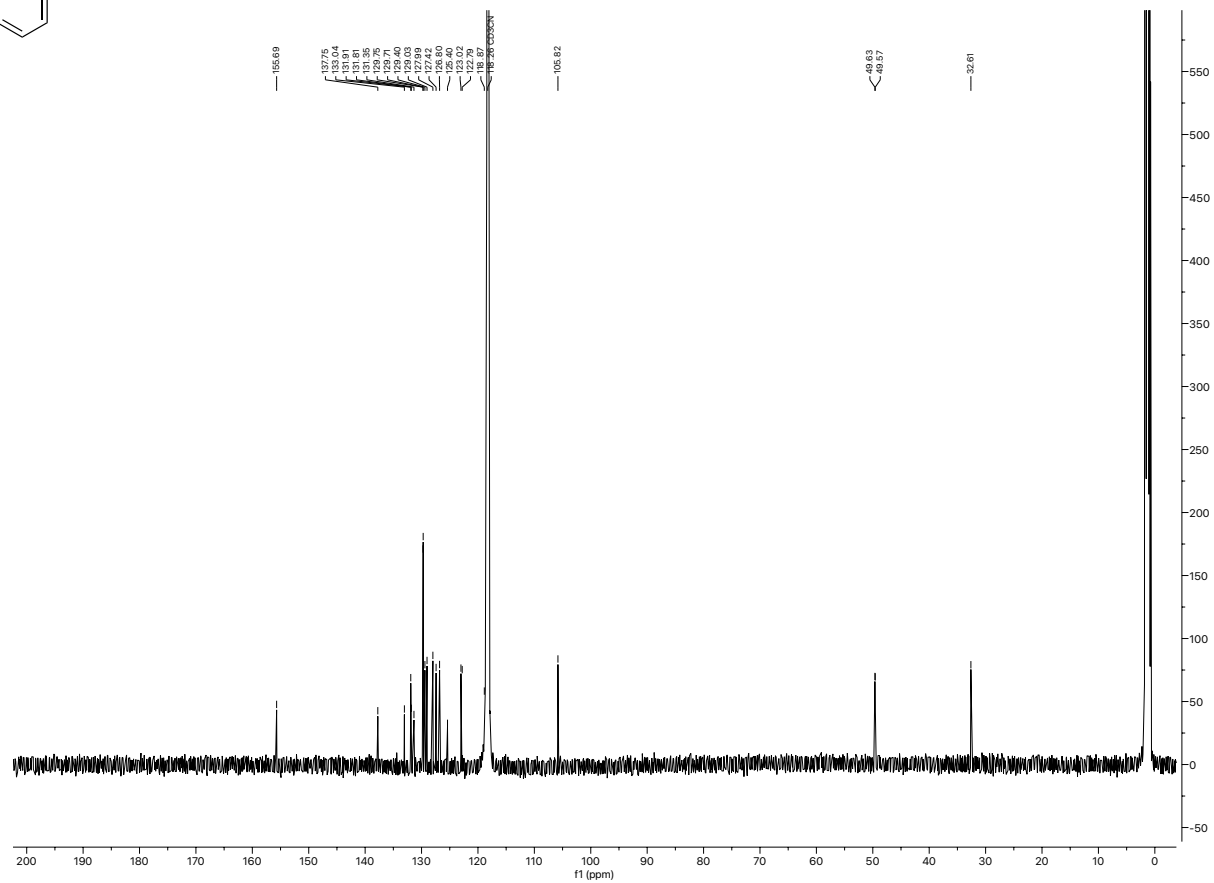

Figure S29. <sup>13</sup>C NMR of 3a in CD<sub>3</sub>CN at 298 K.





# Compound 13 <sup>13</sup>C NMR

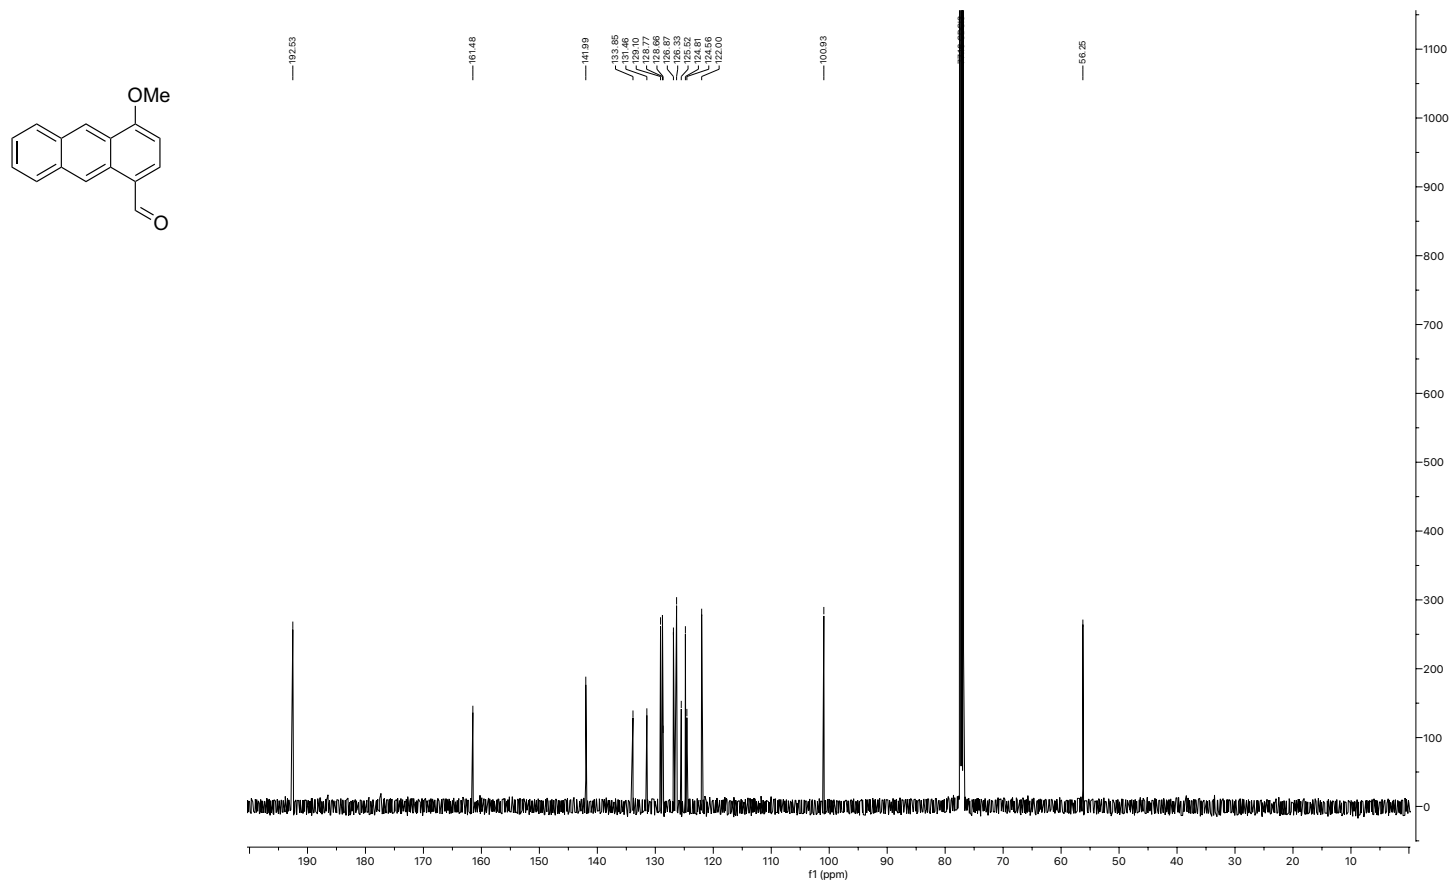

Figure S31. <sup>13</sup>C NMR of 13 in CDCl<sub>3</sub> at 298 K.

# Compound 3b <sup>1</sup>H NMR

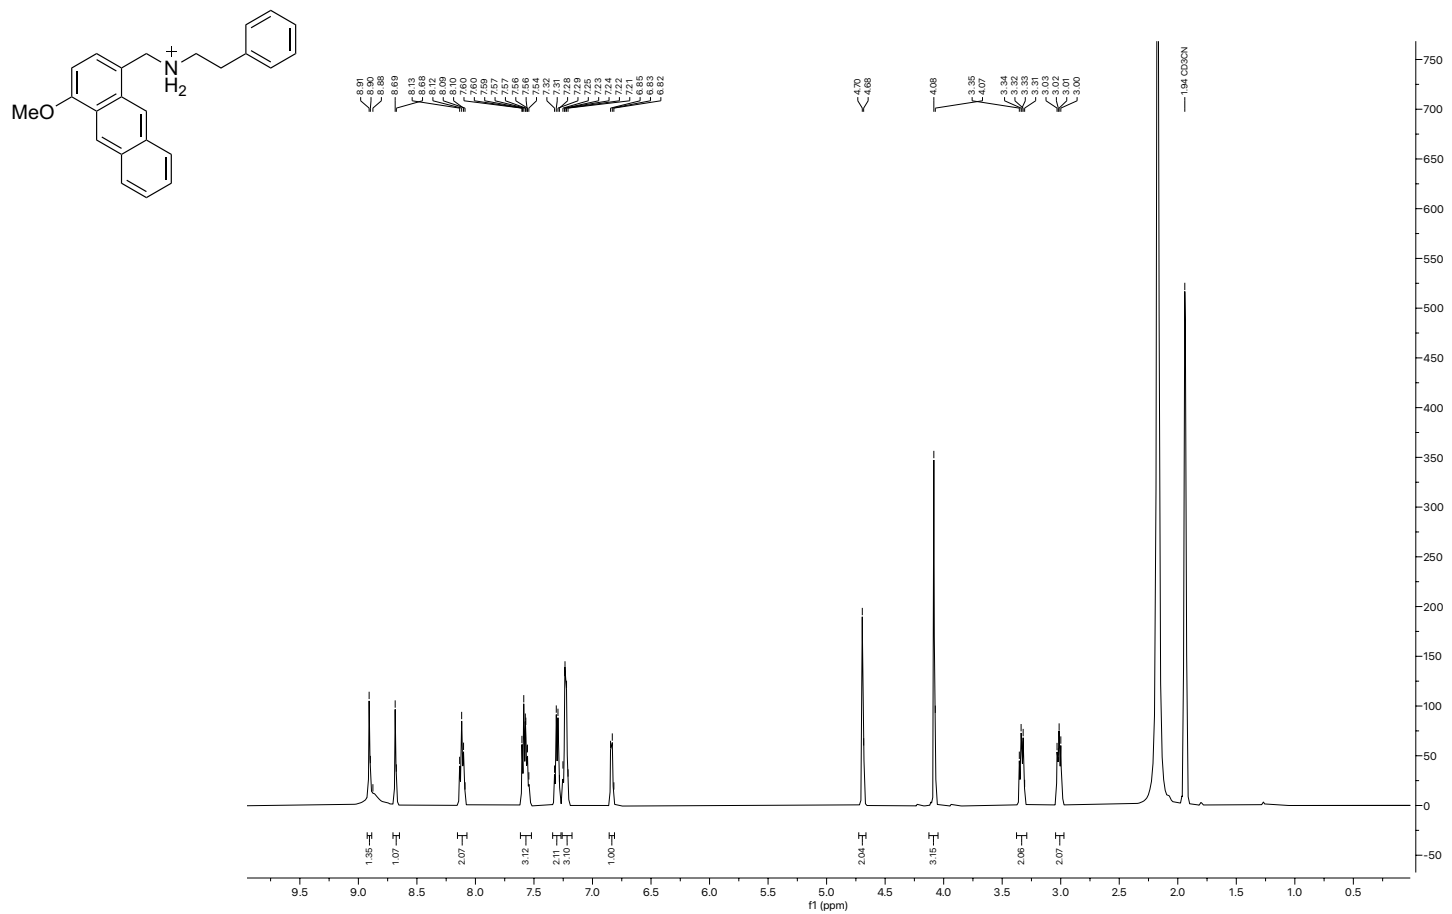

Figure S32. <sup>1</sup>H NMR of 3b in CD<sub>3</sub>CN at 298 K.

# Compound 3b <sup>13</sup>C NMR

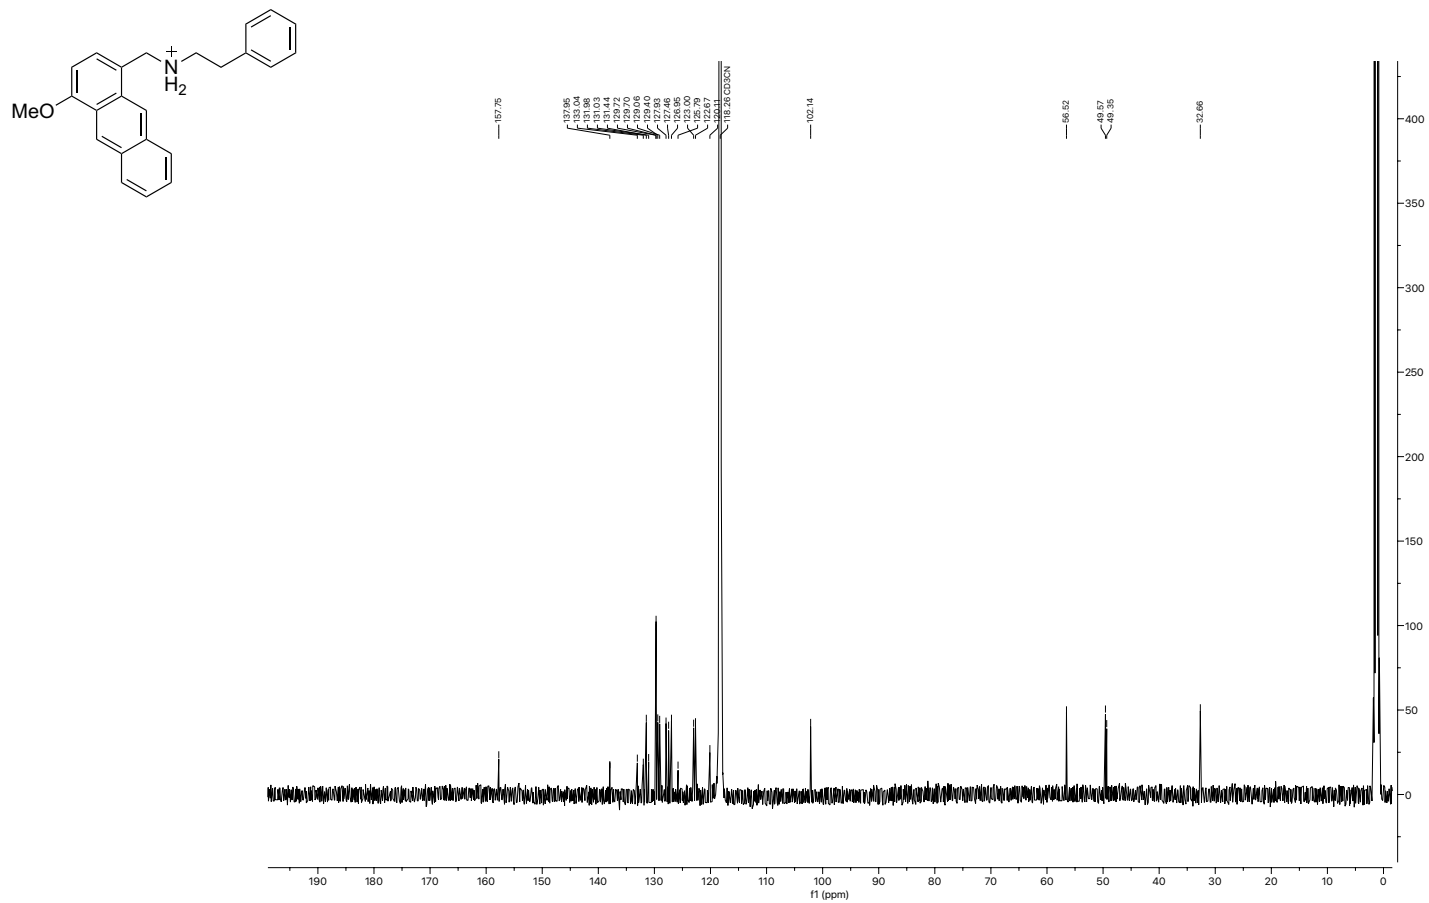

Figure S33. <sup>13</sup>C NMR of 3b in CD<sub>3</sub>CN at 298 K.

# Compound 9 <sup>1</sup>H NMR

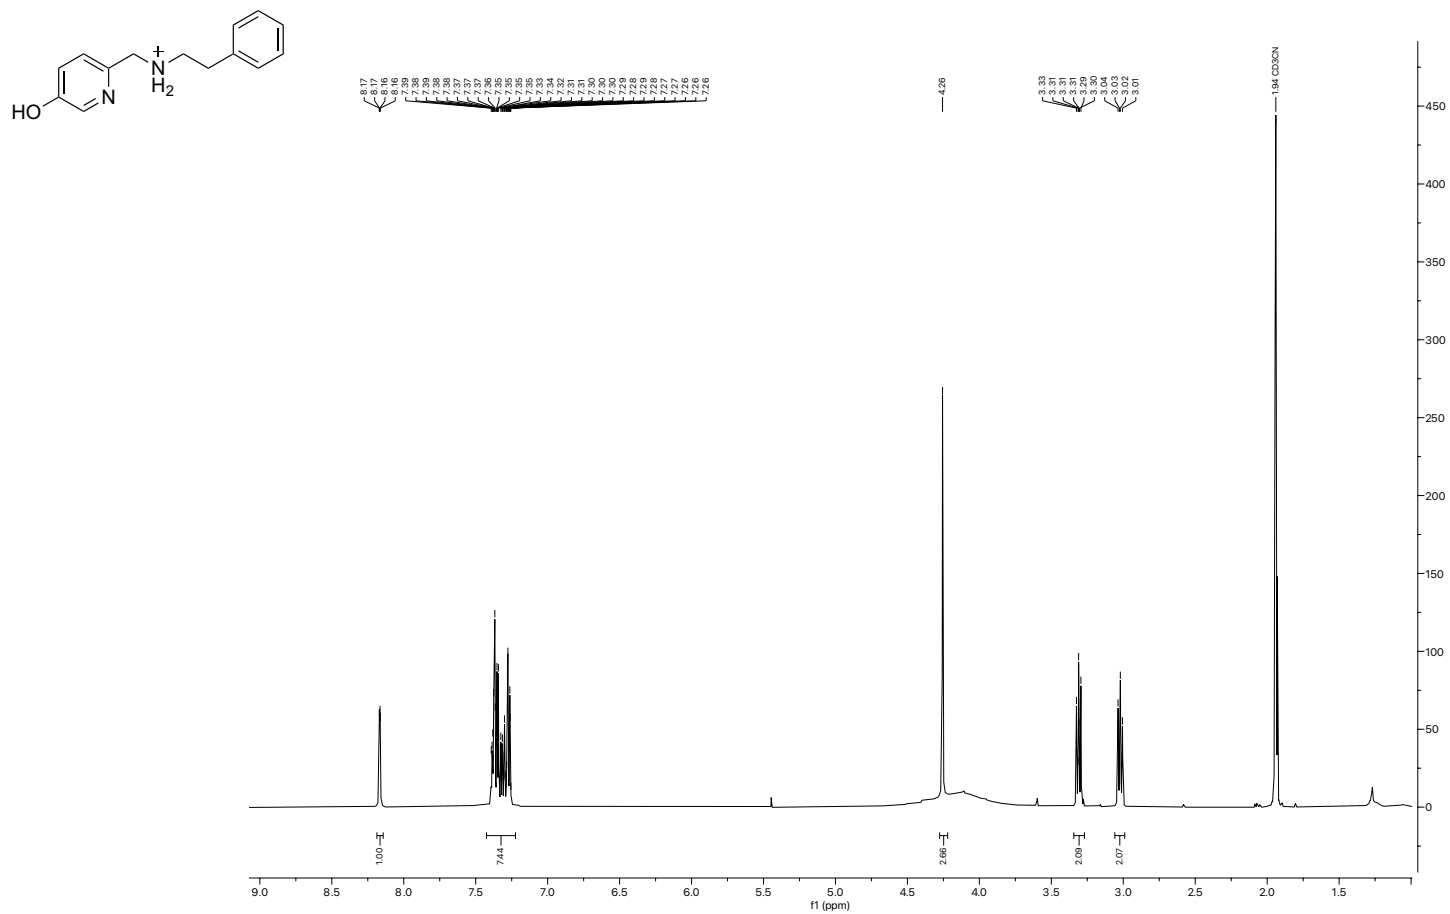

Figure S34. <sup>1</sup>H NMR of 9 in CD<sub>3</sub>CN at 298 K.

# Compound 9 <sup>13</sup>C NMR

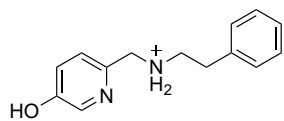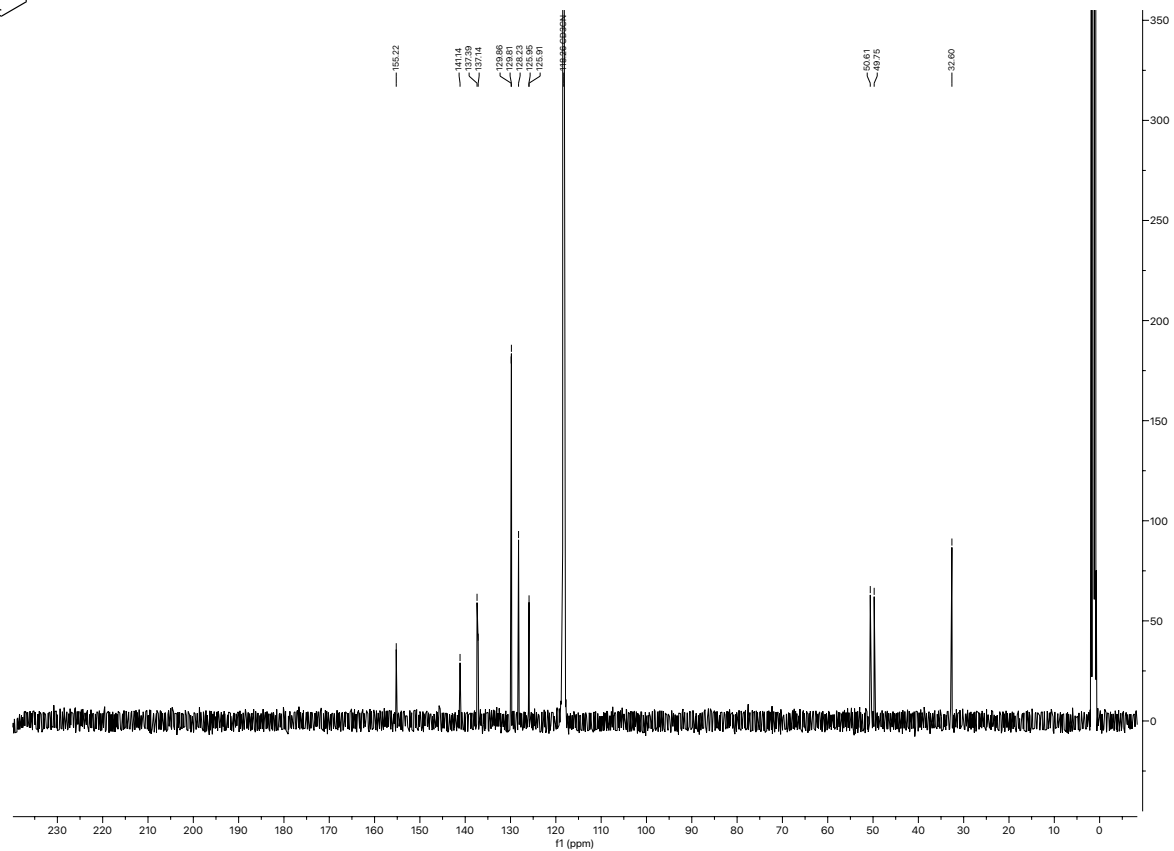

Figure S35. <sup>13</sup>C NMR of 9 in CD<sub>3</sub>CN at 298 K.

# Compound 14 <sup>1</sup>H NMR

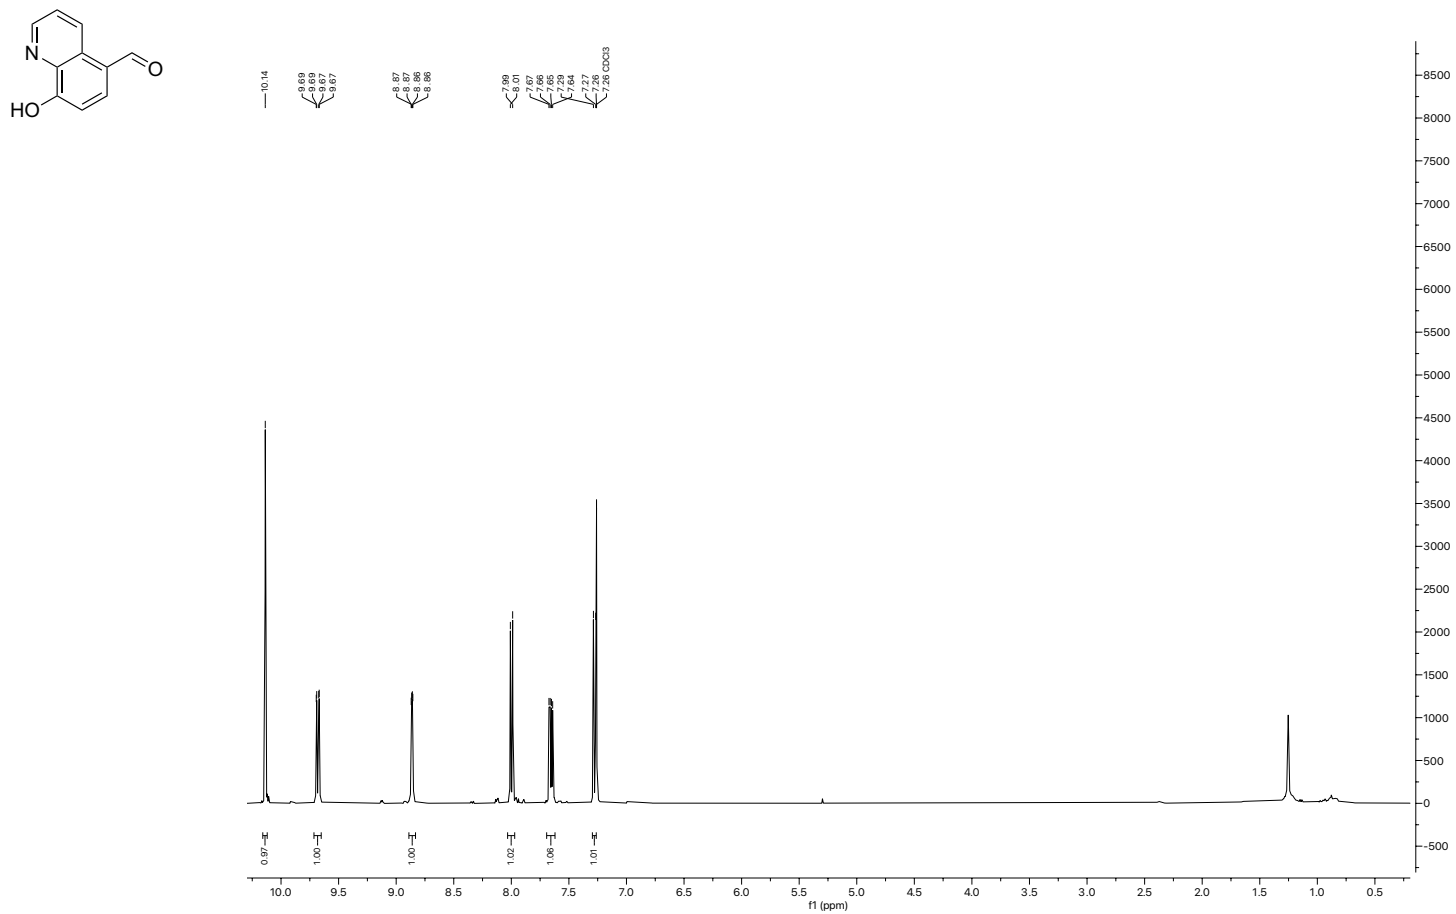

Figure S36. <sup>1</sup>H NMR of 14 in CDCl<sub>3</sub> at 298 K.

# Compound 14 <sup>13</sup>C NMR

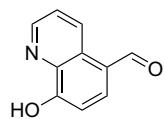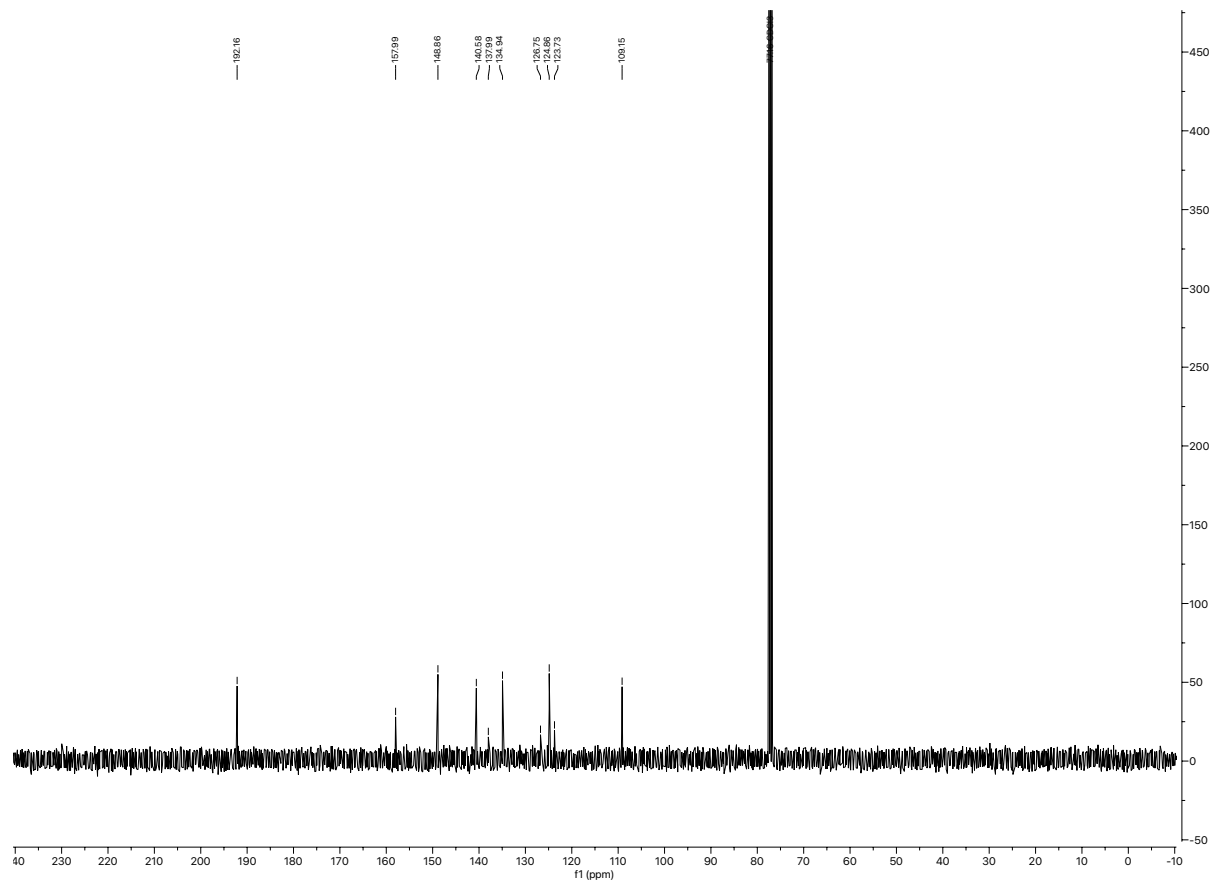

Figure S37. <sup>13</sup>C NMR of 14 in CDCl<sub>3</sub> at 298 K.

# Compound 10 <sup>1</sup>H NMR

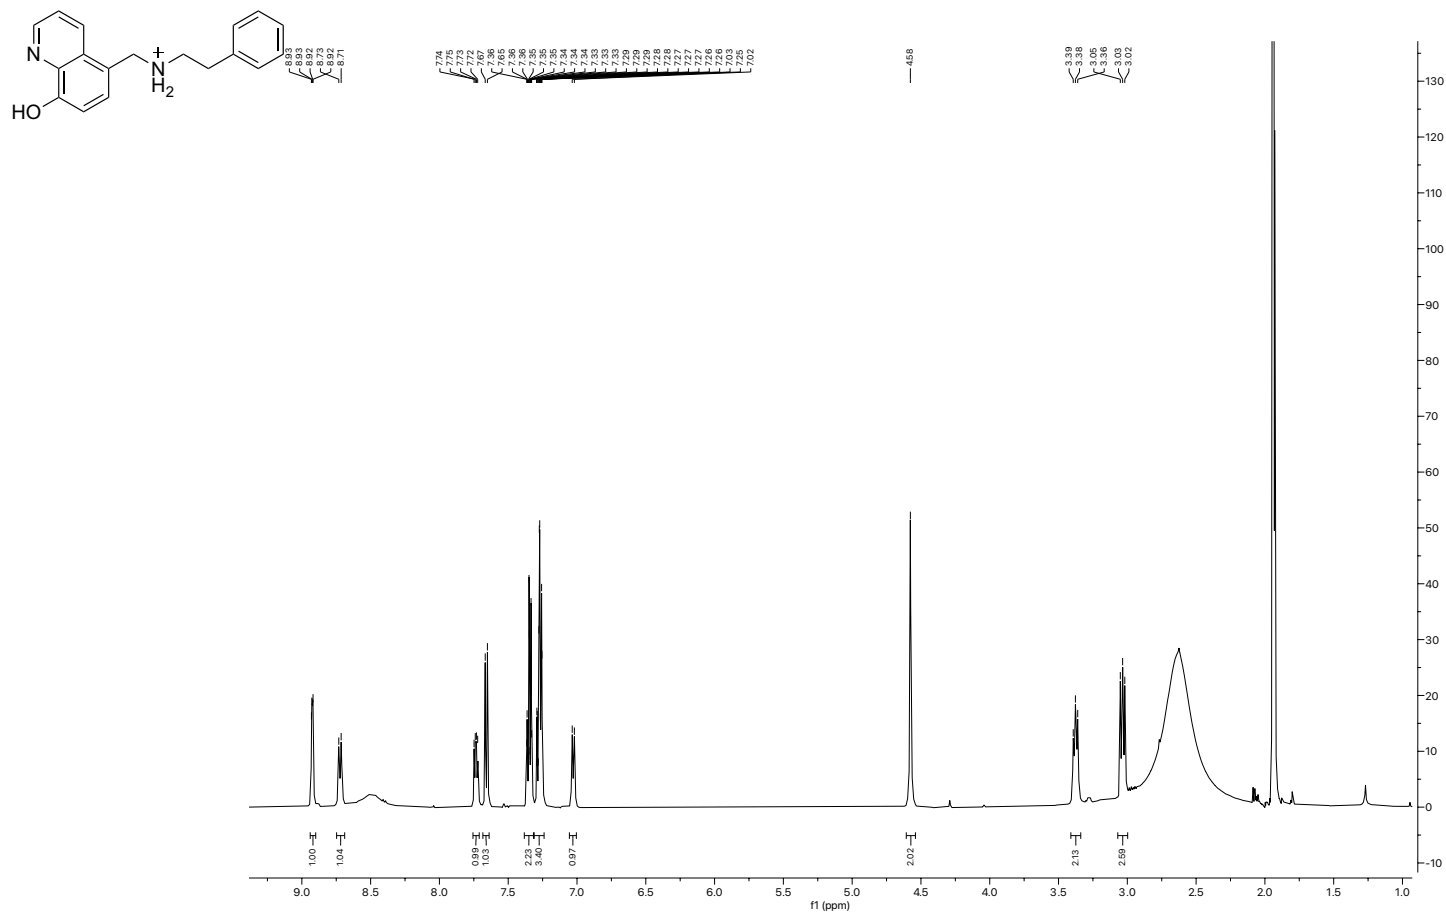

Figure S38. <sup>1</sup>H NMR of **10** in CD<sub>3</sub>CN at 298 K.



# Compound 10 <sup>13</sup>C NMR

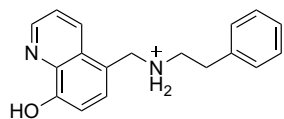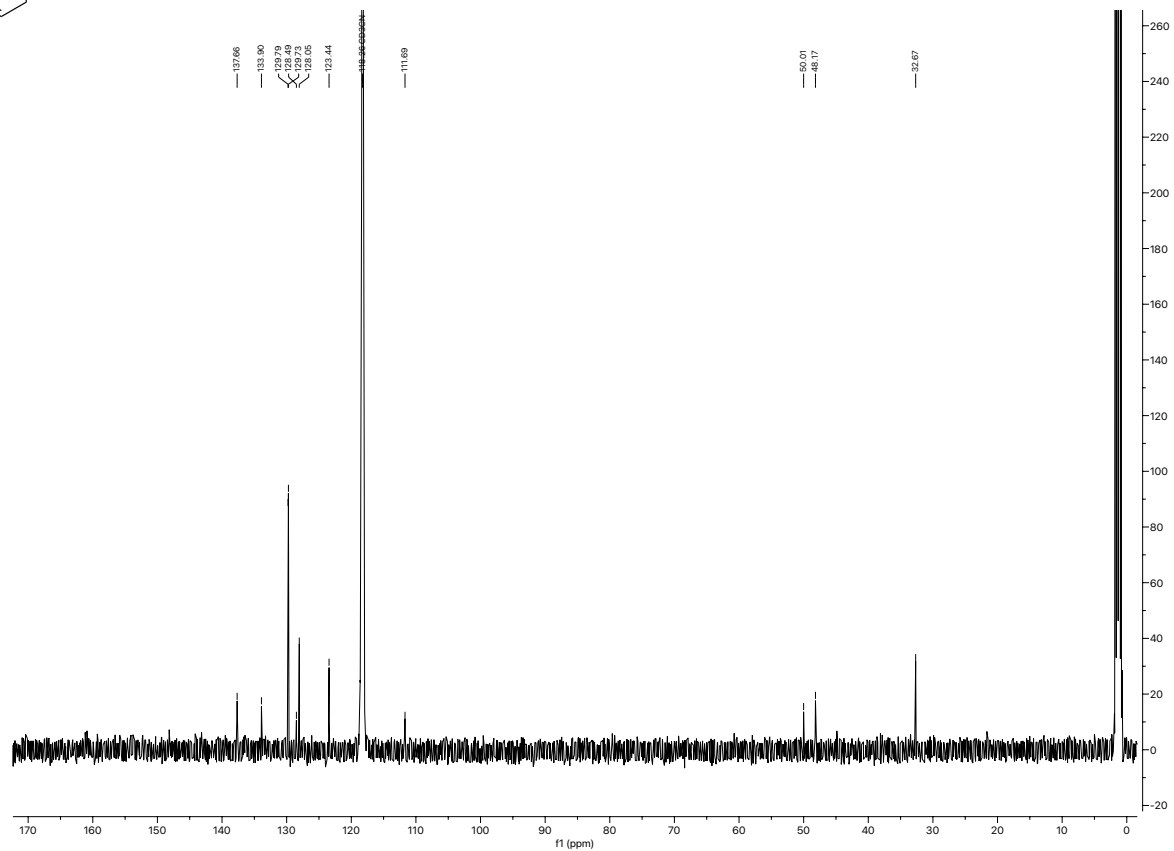

Figure S39. <sup>13</sup>C NMR of 10 in CD<sub>3</sub>CN at 298 K.



# Compound 15 <sup>13</sup>C NMR

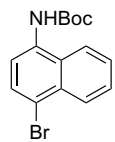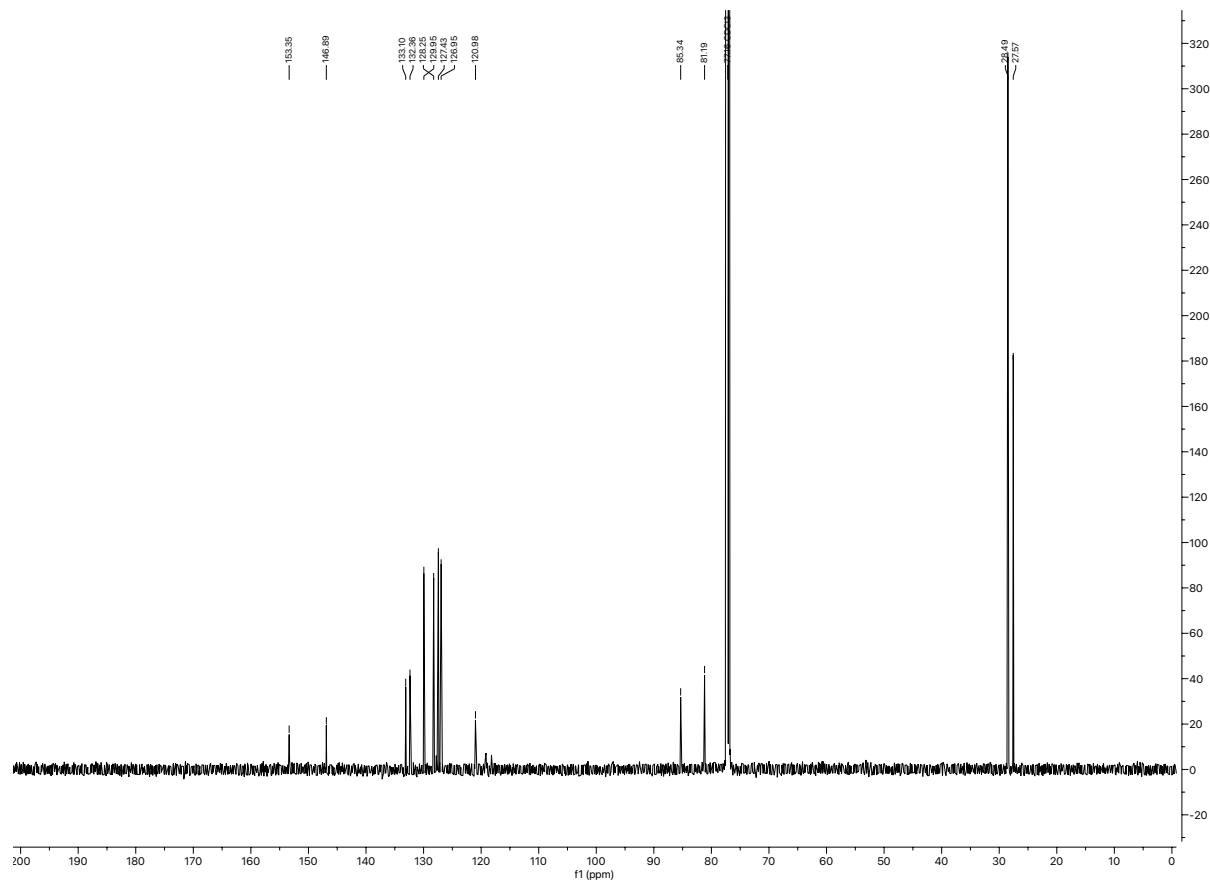

Figure S41. <sup>13</sup>C NMR of 15 in CDCl<sub>3</sub> at 298 K.

# Compound 16 <sup>1</sup>H NMR

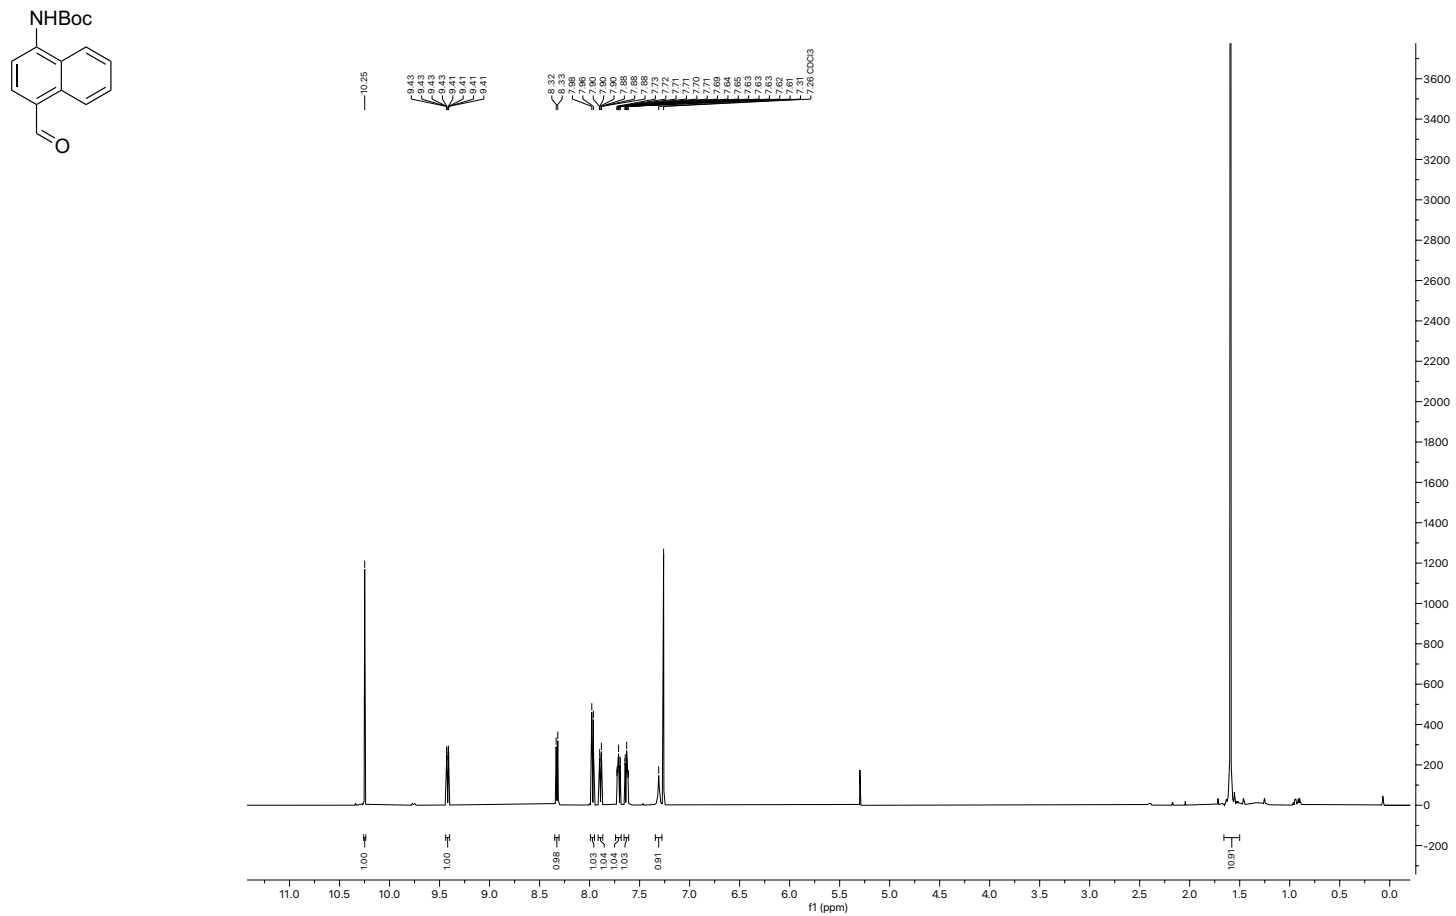

Figure S42. <sup>1</sup>H NMR of 16 in CDCl<sub>3</sub> at 298 K.

# Compound 16 <sup>13</sup>C NMR

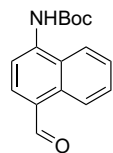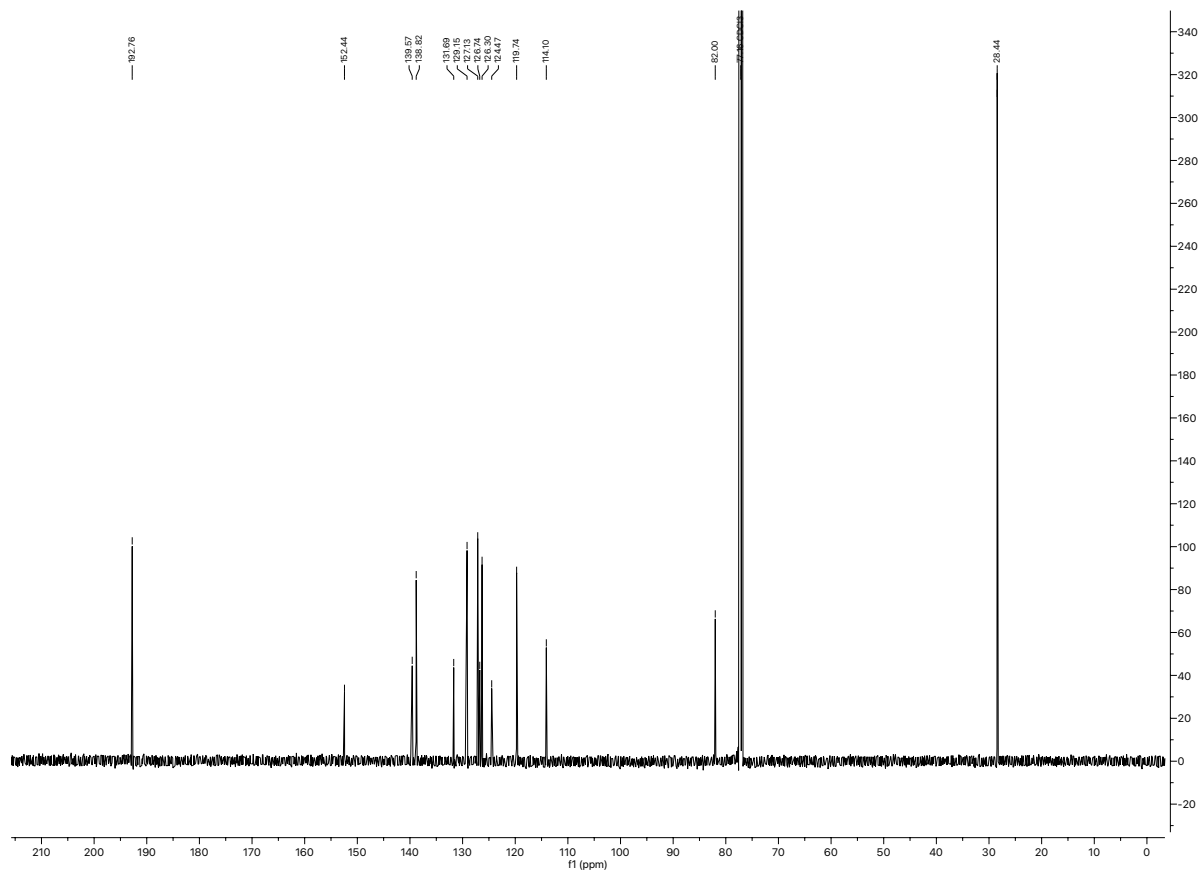

Figure S43. <sup>13</sup>C NMR of 16 in CDCl<sub>3</sub> at 298 K.

# Compound 17 <sup>1</sup>H NMR

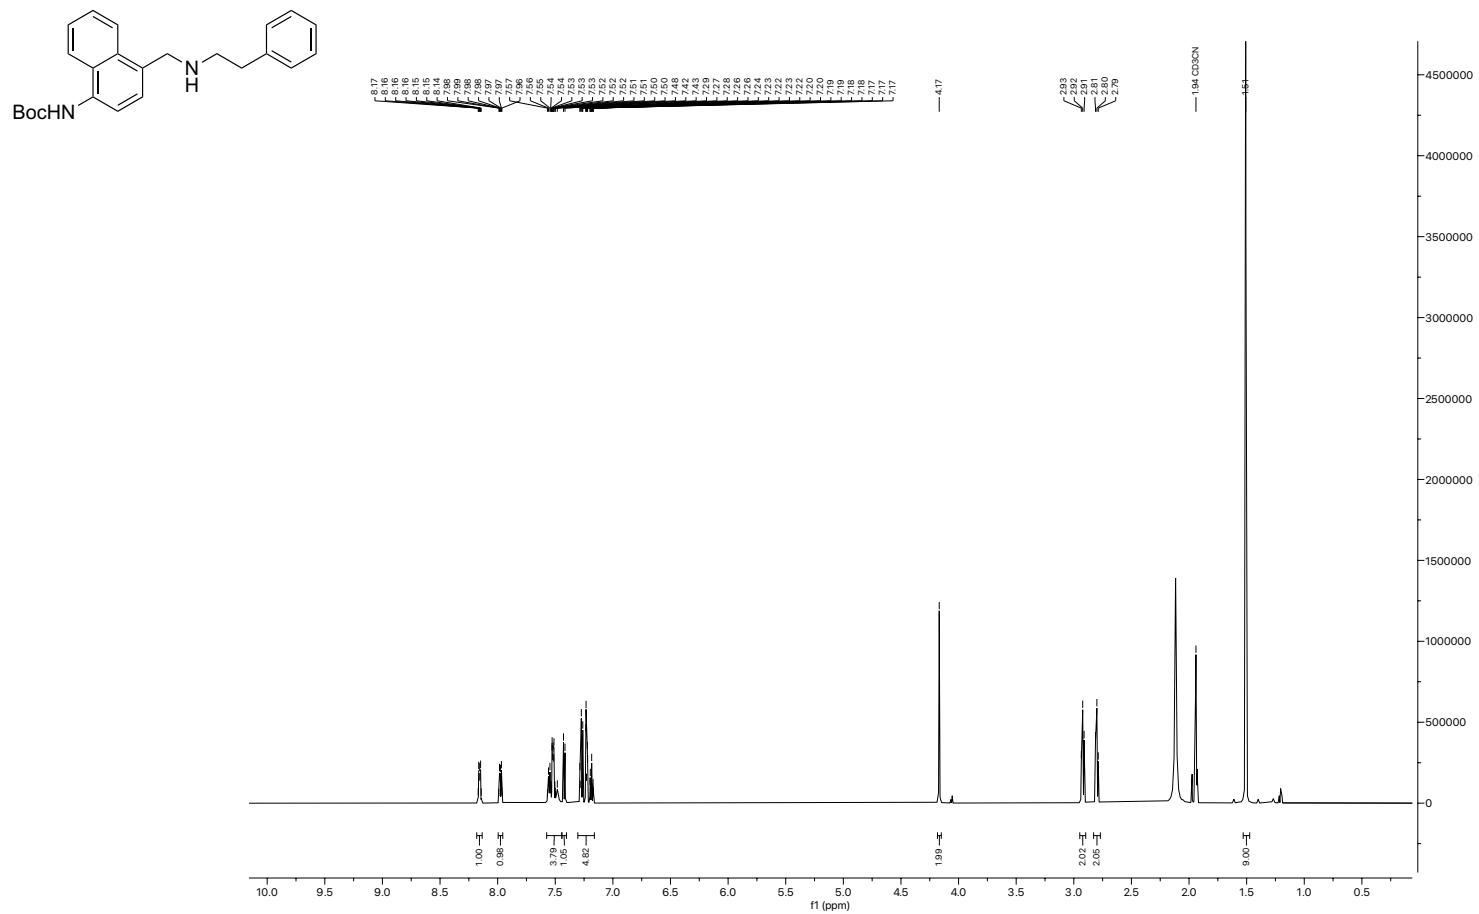

Figure S44. <sup>1</sup>H NMR of 17 in CD<sub>3</sub>CN at 298 K.

# Compound 17 <sup>13</sup>C NMR

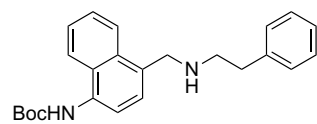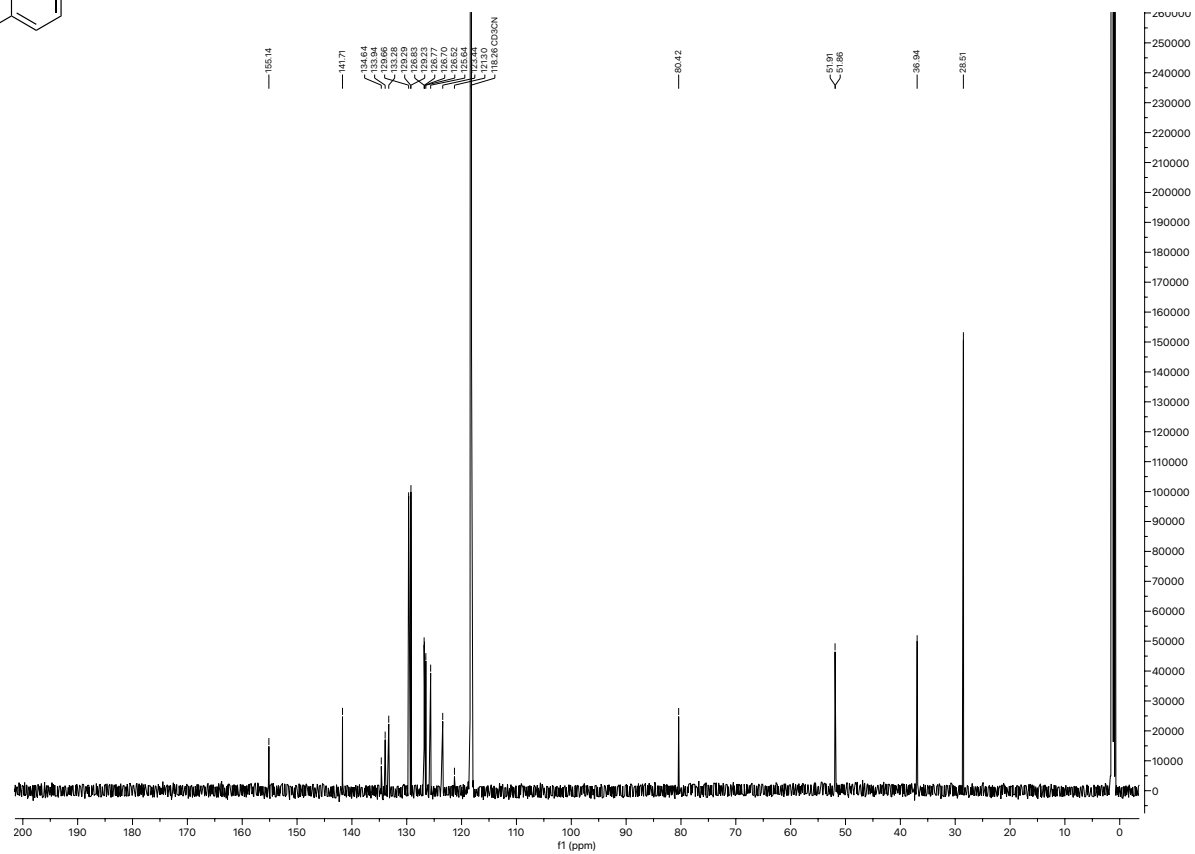

Figure S45. <sup>13</sup>C NMR of 17 in CD<sub>3</sub>CN at 298 K.





# Compound 11 <sup>13</sup>C NMR

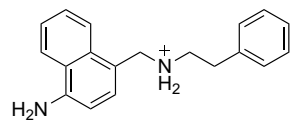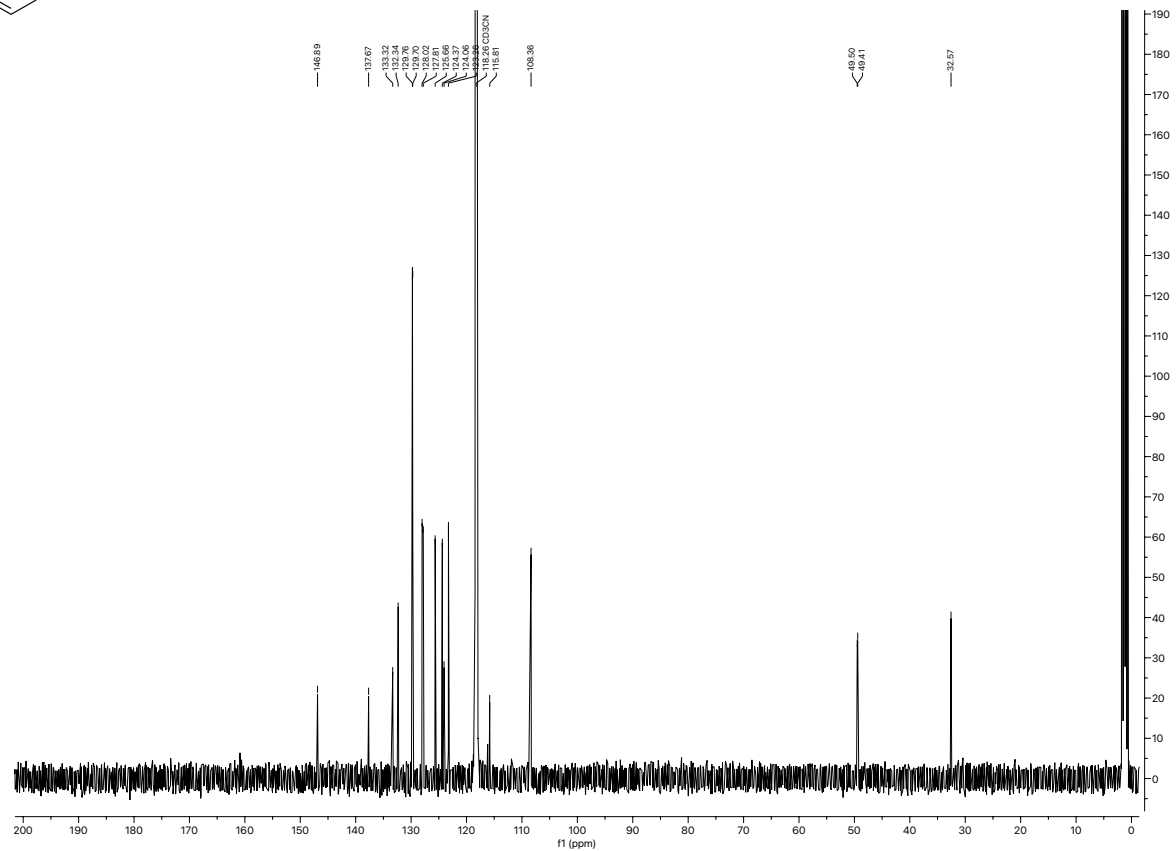

Figure S47. <sup>13</sup>C NMR of 11 in CD<sub>3</sub>CN at 298 K.

## General Computational Details

All calculations were carried out with the Gaussian 16 software package.<sup>1</sup> Ground state geometries were optimized in water with the CPCM solvation model<sup>2</sup> using the B3LYP functional<sup>3,4</sup> with the D3 correction for dispersion.<sup>5</sup> The 6-31+G(d,p) basis set was used for all atoms in the system. Frequency calculations were carried out at the same level of theory to ensure that stationary points were truly minima or saddle points on the potential energy surface. Thermal corrections to free energies were calculated using Grimme's quasi-rigid rotor-harmonic oscillator approximation at 298K<sup>6</sup> using the Goodvibes program.<sup>7</sup> Single point energy calculations were performed with the M06-2X functional<sup>8</sup> and the aug-cc-pVTZ basis set<sup>9</sup> for all atoms in the system, and solvation effects were incorporated with the CPCM solvation model in water. Conformational searches were carried out using the CREST conformer-rotamer ensemble sampling tool,<sup>10,11</sup> version 2.7.1 with XTB version 6.2 RC2 (SAW190805).<sup>12-14</sup> All transition states were verified using intrinsic reaction coordinate (IRC) calculations. Images of molecular structures were rendered in CYLview.<sup>15</sup>

$pK_a$  calculations for hydroxybenzylammoniums and azabenzylammoniums were performed using the online platform <https://xundrug.cn/molgpka>.<sup>16</sup>

## Computed $pK_a$ Values

### Aromatic Scaffolds

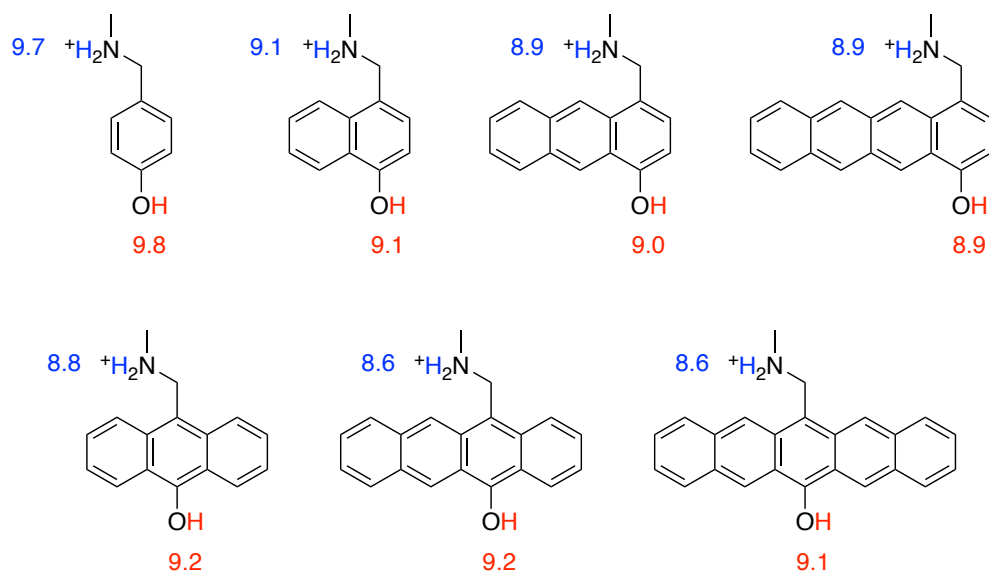

**Figure S48.**  $pK_a$  values calculated for protons for the scaffolds presented in **Figure 2** of the main text.

### Heteroaromatic/Aza Scaffolds

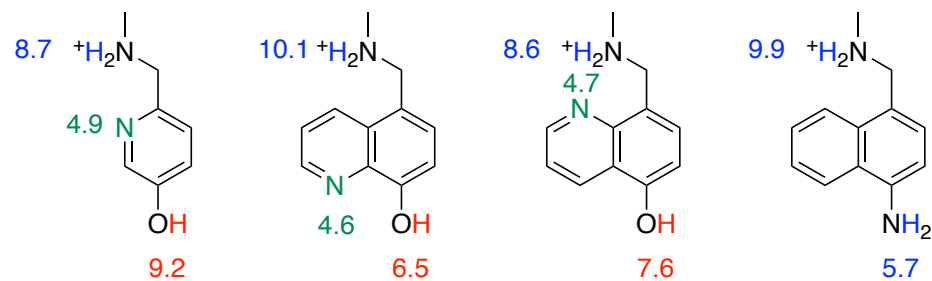

**Figure S49.**  $pK_a$  values calculated for protons for the scaffolds presented in **Figure 4** of the main text.

## Computed Energies – Benzylammoniums (Primary Amine)

### 1,4-Benzene

**Table S1.** Computed energies for the 1,4-benzene hydroxybenzylammonium calculated at the M06-2X/aug-cc-pVTZ, CPCM(Water)//B3LYP-D3/6-31+G(d,p), CPCM(Water) level of theory. All units are in Hartrees.

| Structure   | E           | ZPE      | H           | T.S      | T. qh-S  | G(T)        | qh-G(T)     | SPE         |
|-------------|-------------|----------|-------------|----------|----------|-------------|-------------|-------------|
| Int1        | -441.484423 | 0.180642 | -441.293415 | 0.045677 | 0.044651 | -441.339092 | -441.338066 | -441.403709 |
| TS1         | -441.465476 | 0.175166 | -441.279194 | 0.047794 | 0.046345 | -441.326988 | -441.325539 | -441.374575 |
| Int2        | -345.584159 | 0.108939 | -345.467851 | 0.037885 | 0.037763 | -345.505736 | -345.505614 | -345.526779 |
| Methylamine | -95.87827   | 0.064024 | -95.809891  | 0.027277 | 0.027279 | -95.837168  | -95.83717   | -95.849641  |

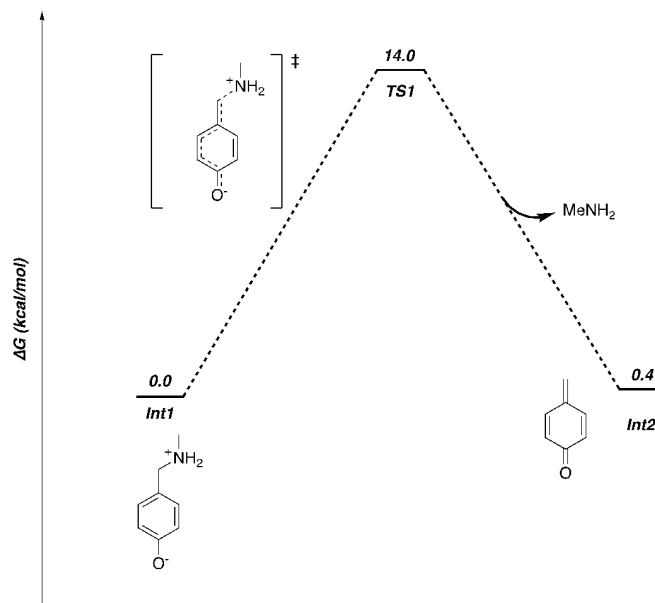

**Figure S50.** Free energy diagram for the 1,4-benzene hydroxybenzylammonium calculated at the M06-2X/aug-cc-pVTZ, CPCM(Water)//B3LYP-D3/6-31+G(d,p), CPCM(Water) level of theory.

## 1,4-Naphthalene

**Table S2.** Computed energies for the 1,4-naphthalene hydroxybenzylammonium calculated at the M06-2X/aug-cc-pVTZ, CPCM(Water)//B3LYP-D3/6-31+G(d,p), CPCM(Water) level of theory. All units are in Hartrees.

| Structure   | E           | ZPE      | H           | T.S      | T. qh-S  | G(T)        | qh-G(T)     | SPE         |
|-------------|-------------|----------|-------------|----------|----------|-------------|-------------|-------------|
| Int1        | -595.14508  | 0.227673 | -594.90455  | 0.051131 | 0.050151 | -594.955681 | -594.954701 | -595.041926 |
| TS1         | -595.130081 | 0.223254 | -594.89347  | 0.053052 | 0.051337 | -594.946522 | -594.944807 | -595.017629 |
| Int2        | -499.251416 | 0.15627  | -499.085268 | 0.044211 | 0.043721 | -499.129479 | -499.128988 | -499.172606 |
| Methylamine | -95.87827   | 0.064024 | -95.809891  | 0.027277 | 0.027279 | -95.837168  | -95.83717   | -95.849641  |

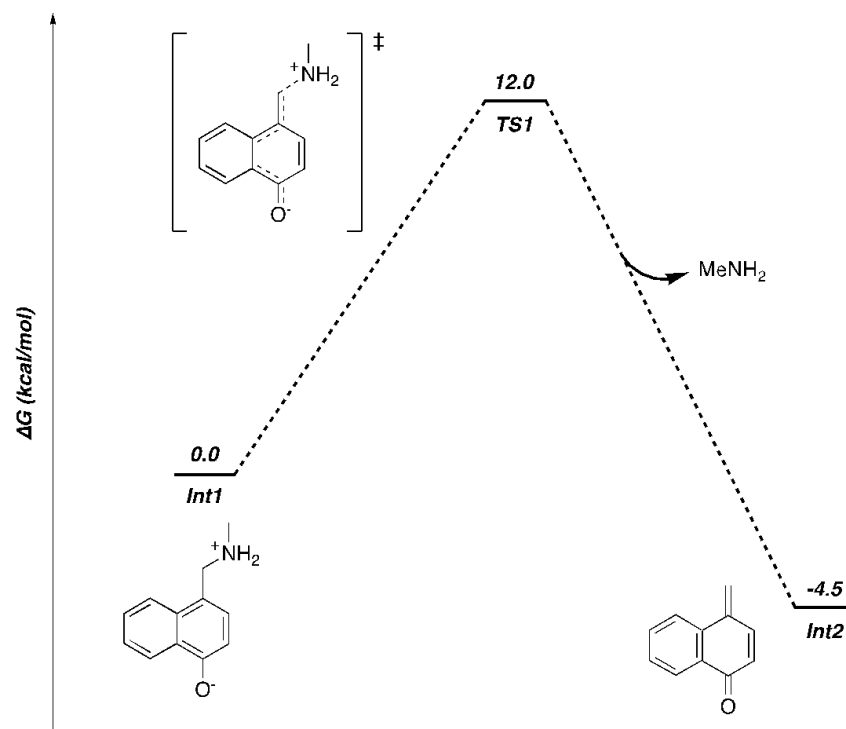

**Figure S51.** Free energy diagram for the 1,4-naphthalene hydroxybenzylammonium calculated at the M06-2X/aug-cc-pVTZ, CPCM(Water)//B3LYP-D3/6-31+G(d,p), CPCM(Water) level of theory.

## 1,4-Anthracene

**Table S3.** Computed energies for the 1,4-anthracene hydroxybenzylammonium calculated at the M06-2X/aug-cc-pVTZ, CPCM(Water)//B3LYP-D3/6-31+G(d,p), CPCM(Water) level of theory. All units are in Hartrees.

| Structure   | E           | ZPE      | H           | T.S      | T. qh-S  | G(T)        | qh-G(T)     | SPE         |
|-------------|-------------|----------|-------------|----------|----------|-------------|-------------|-------------|
| Int1        | -748.799677 | 0.274412 | -748.509849 | 0.0568   | 0.055505 | -748.566649 | -748.565355 | -748.672681 |
| TS1         | -748.78589  | 0.269819 | -748.499993 | 0.059699 | 0.057187 | -748.559693 | -748.55718  | -748.649846 |
| Int2        | -652.908802 | 0.202923 | -652.693312 | 0.050647 | 0.049596 | -652.743958 | -652.742908 | -652.806198 |
| Methylamine | -95.87827   | 0.064024 | -95.809891  | 0.027277 | 0.027279 | -95.837168  | -95.83717   | -95.849641  |

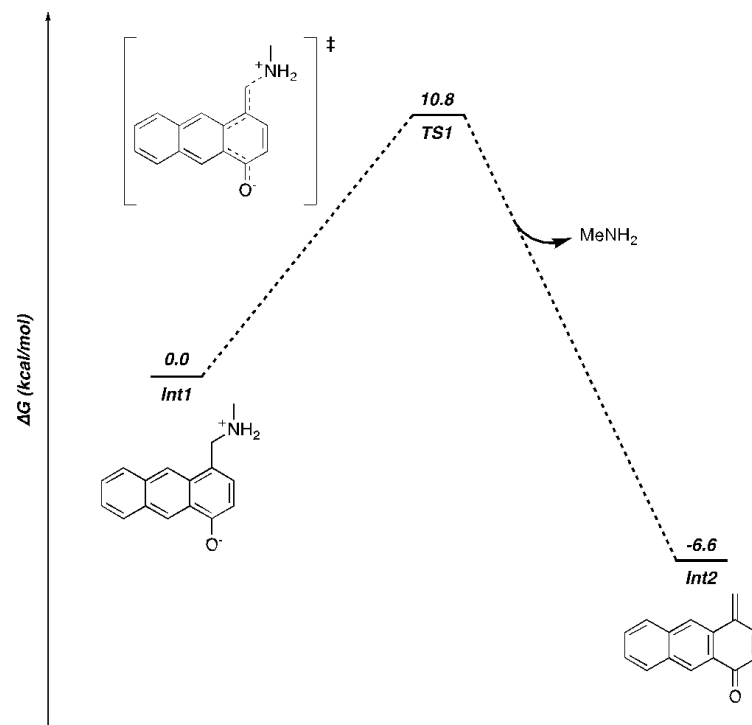

**Figure S52.** Free energy diagram for the 1,4-anthracene hydroxybenzylammonium calculated at the M06-2X/aug-cc-pVTZ, CPCM(Water)//B3LYP-D3/6-31+G(d,p), CPCM(Water) level of theory.

## 9,10-Anthracene

**Table S4.** Computed energies for the 9,10-anthracene hydroxybenzylammonium calculated at the M06-2X/aug-cc-pVTZ, CPCM(Water)//B3LYP-D3/6-31+G(d,p), CPCM(Water) level of theory. All units are in Hartrees.

| Structure   | E           | ZPE      | H           | T.S      | T. qh-S  | G(T)        | qh-G(T)     | SPE         |
|-------------|-------------|----------|-------------|----------|----------|-------------|-------------|-------------|
| Int1        | -748.799596 | 0.274685 | -748.50947  | 0.057092 | 0.055471 | -748.566562 | -748.564941 | -748.674229 |
| TS1         | -748.789214 | 0.271064 | -748.502361 | 0.058492 | 0.056328 | -748.560853 | -748.558689 | -748.656592 |
| Int2        | -652.916461 | 0.203493 | -652.700574 | 0.050018 | 0.049228 | -652.750592 | -652.749801 | -652.816691 |
| Methylamine | -95.87827   | 0.064024 | -95.809891  | 0.027277 | 0.027279 | -95.837168  | -95.83717   | -95.849641  |

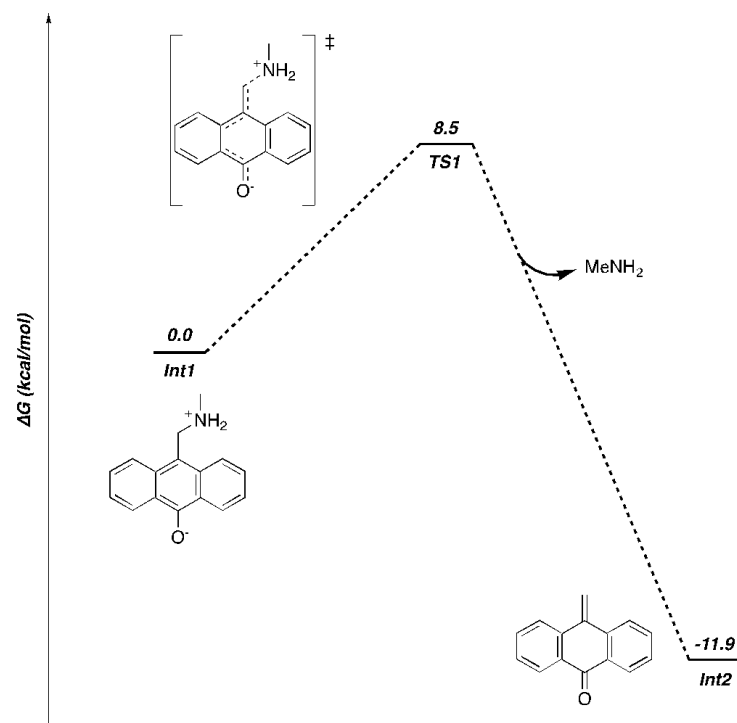

**Figure S53.** Free energy diagram for the 9,10-anthracene hydroxybenzylammonium calculated at the M06-2X/aug-cc-pVTZ, CPCM(Water)//B3LYP-D3/6-31+G(d,p), CPCM(Water) level of theory.

## 1,4-Tetracene

**Table S5.** Computed energies for the 1,4-tetracene hydroxybenzylammonium calculated at the M06-2X/aug-cc-pVTZ, CPCM(Water)//B3LYP-D3/6-31+G(d,p), CPCM(Water) level of theory. All units are in Hartrees.

| Structure   | E           | ZPE      | H           | T.S      | T. qh-S  | G(T)        | qh-G(T)     | SPE         |
|-------------|-------------|----------|-------------|----------|----------|-------------|-------------|-------------|
| Int1        | -902.450795 | 0.320428 | -902.111979 | 0.064537 | 0.061872 | -902.176516 | -902.173851 | -902.29865  |
| TS1         | -902.437274 | 0.316506 | -902.102057 | 0.065263 | 0.062512 | -902.16732  | -902.164569 | -902.276777 |
| Int2        | -806.561034 | 0.249392 | -806.296349 | 0.056989 | 0.055338 | -806.353338 | -806.351687 | -806.433807 |
| Methylamine | -95.87827   | 0.064024 | -95.809891  | 0.027277 | 0.027279 | -95.837168  | -95.83717   | -95.849641  |

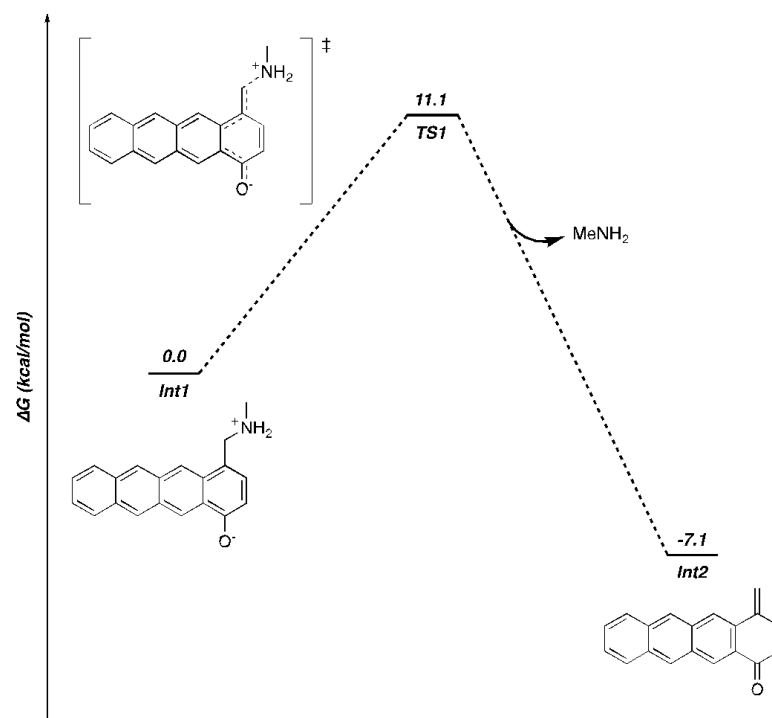

**Figure S54.** Free energy diagram for the 1,4-tetracene hydroxybenzylammonium calculated at the M06-2X/aug-cc-pVTZ, CPCM(Water)//B3LYP-D3/6-31+G(d,p), CPCM(Water) level of theory.



## 5,12-Tetracene

**Table S6.** Computed energies for the 5,12-tetracene hydroxybenzylammonium calculated at the M06-2X/aug-cc-pVTZ, CPCM(Water)//B3LYP-D3/6-31+G(d,p), CPCM(Water) level of theory. All units are in Hartrees.

| Structure   | E          | ZPE      | H          | T.S      | T. qh-S  | G(T)       | qh-G(T)    | SPE        |
|-------------|------------|----------|------------|----------|----------|------------|------------|------------|
| Int1        | -902.45398 | 0.321028 | -902.11464 | 0.063926 | 0.061523 | -902.17857 | -902.17617 | -902.30371 |
| TS1         | -902.44431 | 0.317596 | -902.10821 | 0.064715 | 0.061958 | -902.17293 | -902.17017 | -902.28817 |
| Int2        | -806.57408 | 0.250112 | -806.30889 | 0.056158 | 0.054868 | -806.36505 | -806.36376 | -806.45053 |
| Methylamine | -95.87827  | 0.064024 | -95.809891 | 0.027277 | 0.027279 | -95.837168 | -95.83717  | -95.849641 |

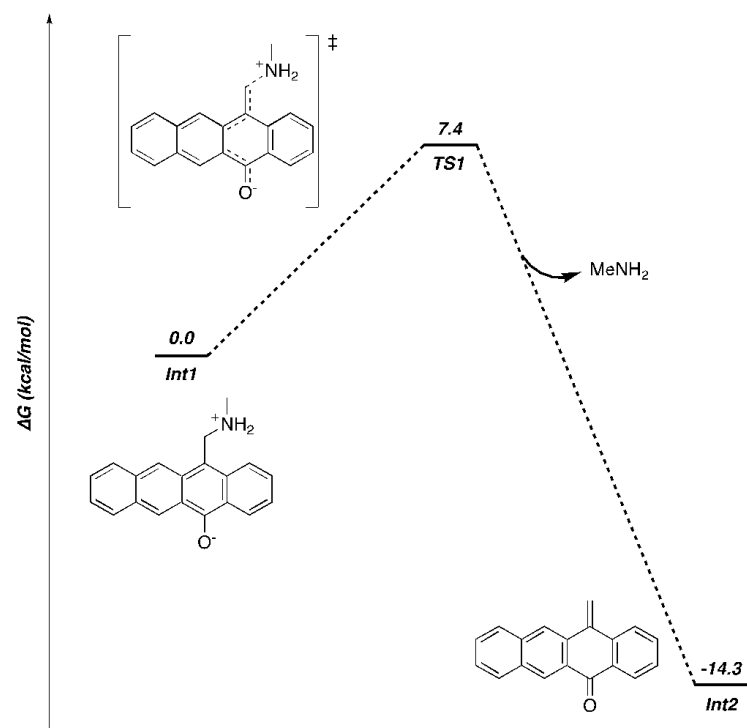

**Figure S55.** Free energy diagram for the 5,12-tetracene hydroxybenzylammonium calculated at the M06-2X/aug-cc-pVTZ, CPCM(Water)//B3LYP-D3/6-31+G(d,p), CPCM(Water) level of theory.

## 6,13-Pentacene

**Table S7.** Computed energies for the 6,13-pentacene hydroxybenzylammonium calculated at the M06-2X/aug-cc-pVTZ, CPCM(Water)//B3LYP-D3/6-31+G(d,p), CPCM(Water) level of theory. All units are in Hartrees.

| Structure   | E            | ZPE      | H            | T.S      | T. qh-S  | G(T)         | qh-G(T)      | SPE          |
|-------------|--------------|----------|--------------|----------|----------|--------------|--------------|--------------|
| Int1        | -1056.107499 | 0.367446 | -1055.719115 | 0.069603 | 0.066717 | -1055.788718 | -1055.785832 | -1055.933759 |
| TS1         | -1056.09938  | 0.364342 | -1055.713883 | 0.070522 | 0.067328 | -1055.784405 | -1055.781211 | -1055.919905 |
| Int2        | -960.231831  | 0.296763 | -959.917305  | 0.062203 | 0.060382 | -959.979508  | -959.977686  | -960.08449   |
| Methylamine | -95.87827    | 0.064024 | -95.809891   | 0.027277 | 0.027279 | -95.837168   | -95.83717    | -95.849641   |

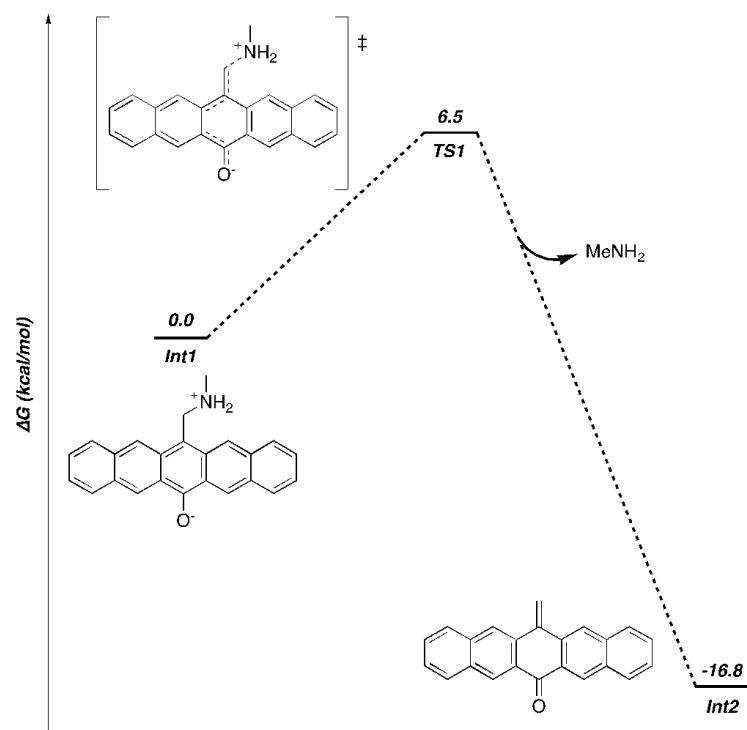

**Figure S56.** Free energy diagram for the 6,13-pentacene hydroxybenzylammonium calculated at the M06-2X/aug-cc-pVTZ, CPCM(Water)//B3LYP-D3/6-31+G(d,p), CPCM(Water) level of theory.

## 8-Hydroxyquinoline

**Table S8.** Computed energies for the 8-hydroxyquinoline benzylammonium calculated at the M06-2X/aug-cc-pVTZ, CPCM(Water)//B3LYP-D3/6-31+G(d,p), CPCM(Water) level of theory. All units are in Hartrees.

| Structure   | E           | ZPE      | H           | T.S      | T. qh-S  | G(T)        | qh-G(T)     | SPE        |
|-------------|-------------|----------|-------------|----------|----------|-------------|-------------|------------|
| Int1        | -611.181023 | 0.215831 | -610.952376 | 0.051504 | 0.050206 | -611.00388  | -611.002582 | -611.08325 |
| TS1         | -611.164908 | 0.211101 | -610.940458 | 0.053316 | 0.051434 | -610.993774 | -610.991892 | -611.05811 |
| Int2        | -515.284486 | 0.144401 | -515.130319 | 0.044084 | 0.043566 | -515.174403 | -515.173885 | -515.21201 |
| Methylamine | -95.87827   | 0.064024 | -95.809891  | 0.027277 | 0.027279 | -95.837168  | -95.83717   | -95.849641 |

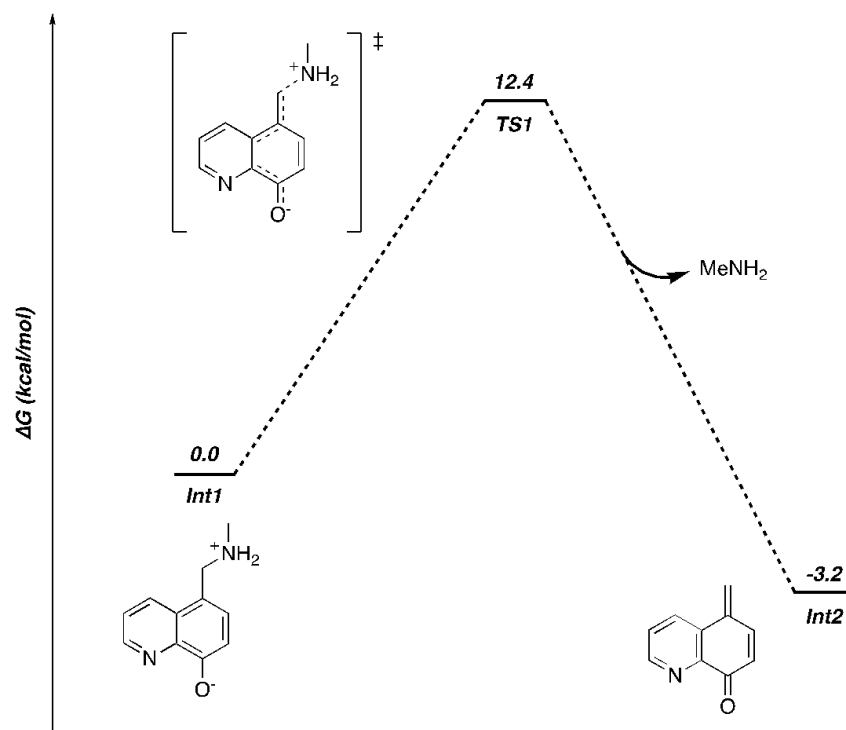

**Figure S57.** Free energy diagram for the 8-hydroxyquinoline benzylammonium calculated at the M06-2X/aug-cc-pVTZ, CPCM(Water)//B3LYP-D3/6-31+G(d,p), CPCM(Water) level of theory.

## 5-Hydroxyquinoline

**Table S9.** Computed energies for the 5-hydroxyquinoline benzylammonium calculated at the M06-2X/aug-cc-pVTZ, CPCM(Water)//B3LYP-D3/6-31+G(d,p), CPCM(Water) level of theory. All units are in Hartrees.

| Structure   | E           | ZPE      | H           | T.S      | T. qh-S  | G(T)        | qh-G(T)     | SPE         |
|-------------|-------------|----------|-------------|----------|----------|-------------|-------------|-------------|
| Int1        | -611.195362 | 0.215481 | -610.967323 | 0.050378 | 0.049485 | -611.017701 | -611.016807 | -611.097251 |
| TS1         | -611.171011 | 0.210683 | -610.946842 | 0.053789 | 0.051759 | -611.000631 | -610.998601 | -611.064188 |
| Int2        | -515.290251 | 0.144528 | -515.136033 | 0.043701 | 0.043418 | -515.179733 | -515.179451 | -515.217369 |
| Methylamine | -95.87827   | 0.064024 | -95.809891  | 0.027277 | 0.027279 | -95.837168  | -95.83717   | -95.849641  |

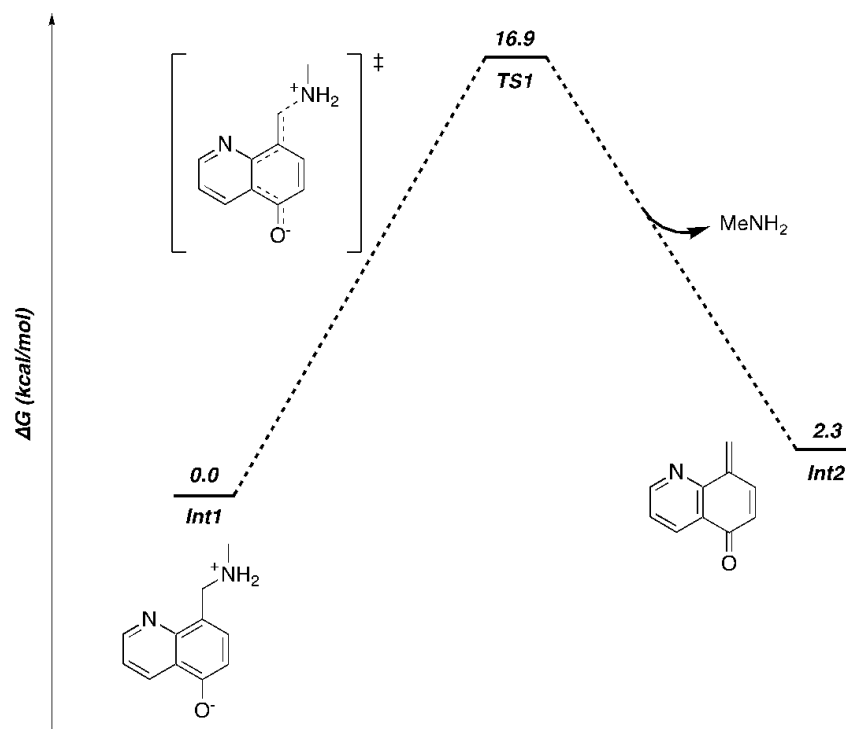

**Figure S58.** Free energy diagram for the 1,5-quinoline benzylammonium calculated at the M06-2X/aug-cc-pVTZ, CPCM(Water)//B3LYP-D3/6-31+G(d,p), CPCM(Water) level of theory.

## Computed Energies – Benzylammoniums (Secondary and Tertiary Amine)

### 1,4-Naphthalene (Secondary Amine)

**Table S10.** Computed energies for the 1,4-naphthalene hydroxybenzylammonium (Secondary amine) calculated at the M06-2X/aug-cc-pVTZ, CPCM(Water)//B3LYP-D3/6-31+G(d,p), CPCM(Water) level of theory. All units are in Hartrees.

| Structure     | E           | ZPE      | H           | T.S      | T. qh-S  | G(T)        | qh-G(T)     | SPE         |
|---------------|-------------|----------|-------------|----------|----------|-------------|-------------|-------------|
| Int1          | -634.460077 | 0.255856 | -634.190192 | 0.053651 | 0.05234  | -634.243842 | -634.242531 | -634.345018 |
| TS1           | -634.444081 | 0.250817 | -634.178453 | 0.057209 | 0.054657 | -634.235662 | -634.23311  | -634.318325 |
| Int2          | -499.251416 | 0.15627  | -499.085268 | 0.044211 | 0.043721 | -499.129479 | -499.128988 | -499.172606 |
| Dimethylamine | -135.188628 | 0.092395 | -135.090937 | 0.030717 | 0.030723 | -135.121654 | -135.121659 | -135.147284 |

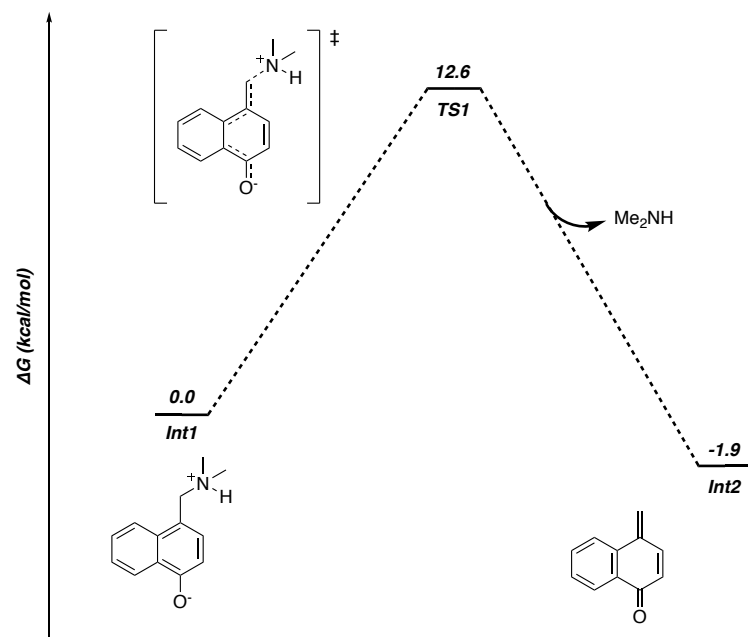

**Figure S59.** Free energy diagram for the 1,4-naphthalene hydroxybenzylammonium (Secondary amine) calculated at the M06-2X/aug-cc-pVTZ, CPCM(Water)//B3LYP-D3/6-31+G(d,p), CPCM(Water) level of theory.

## 1,4-Naphthalene (Tertiary Amine)

**Table S11.** Computed energies for the 1,4-naphthalene hydroxybenzylammonium (Tertiary amine) calculated at the M06-2X/aug-cc-pVTZ, CPCM(Water)//B3LYP-D3/6-31+G(d,p), CPCM(Water) level of theory. All units are in Hartrees.

| Structure      | E           | ZPE      | H           | T.S      | T. qh-S  | G(T)        | qh-G(T)     | SPE         |
|----------------|-------------|----------|-------------|----------|----------|-------------|-------------|-------------|
| Int1           | -673.771674 | 0.284006 | -673.472732 | 0.054928 | 0.053797 | -673.52766  | -673.52653  | -673.645981 |
| TS1            | -673.760536 | 0.278821 | -673.4659   | 0.058244 | 0.056141 | -673.524143 | -673.52204  | -673.623001 |
| Int2           | -499.251416 | 0.15627  | -499.085268 | 0.044211 | 0.043721 | -499.129479 | -499.128988 | -499.172606 |
| Trimethylamine | -174.502343 | 0.120291 | -174.375783 | 0.033462 | 0.033472 | -174.409245 | -174.409254 | -174.44907  |

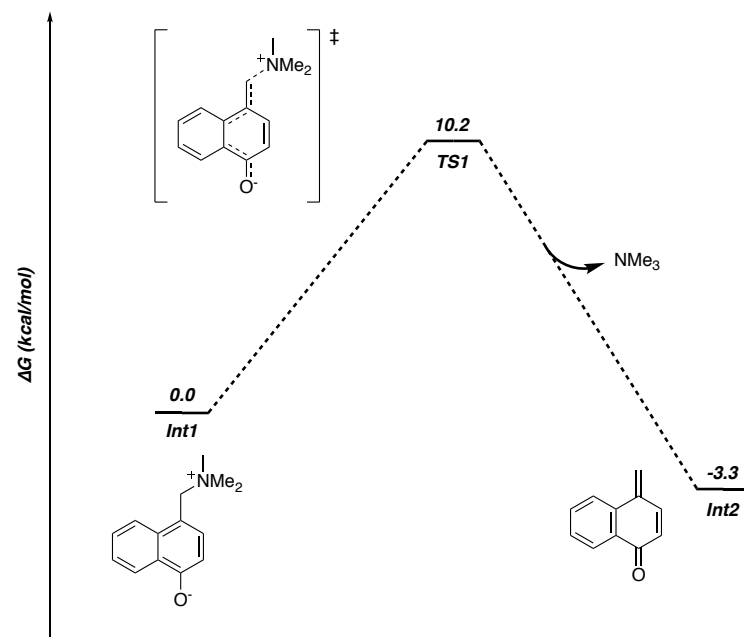

**Figure S60.** Free energy diagram for the 1,4-naphthalene hydroxybenzylammonium (Tertiary amine) calculated at the M06-2X/aug-cc-pVTZ, CPCM(Water)//B3LYP-D3/6-31+G(d,p), CPCM(Water) level of theory.

## Computed Energies – Isomerization

### 1,4-Hydroxyanthraldehyde

**Table S12.** Computed energies for the isomers of the 1,4-hydroxyanthraldehyde calculated at the M06-2X/aug-cc-pVTZ, CPCM(Water)//B3LYP-D3/6-31+G(d,p), CPCM(Water) level of theory. All units are in Hartrees.

| Structure | E           | ZPE      | H           | T.S      | T. qh-S  | G(T)        | qh-G(T)     | SPE         |
|-----------|-------------|----------|-------------|----------|----------|-------------|-------------|-------------|
| HA        | -728.154897 | 0.207604 | -727.933629 | 0.052679 | 0.051855 | -727.986308 | -727.985483 | -728.057741 |
| AA        | -728.137868 | 0.20697  | -727.917068 | 0.054255 | 0.05253  | -727.971323 | -727.969598 | -728.037803 |
| AE        | -728.141269 | 0.207846 | -727.919649 | 0.053849 | 0.052407 | -727.973498 | -727.972056 | -728.043536 |

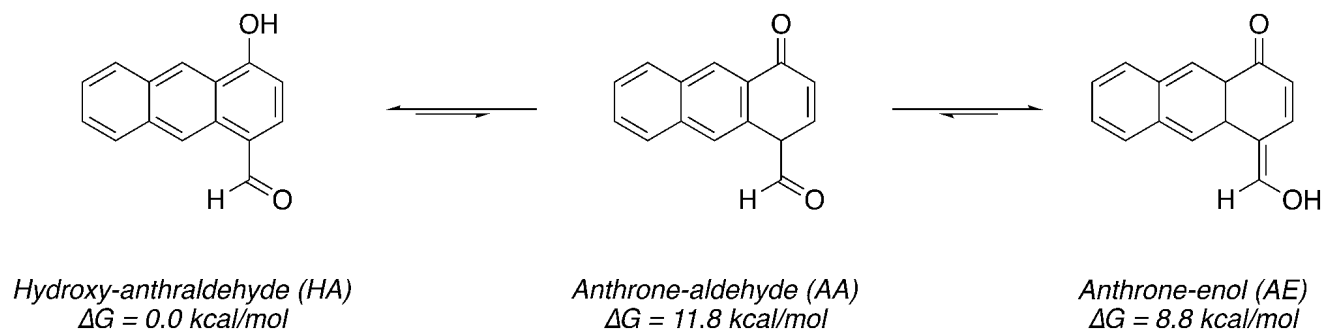

**Figure S61.** Free energies for the isomers of the 1,4-hydroxyanthraldehyde calculated at the M06-2X/aug-cc-pVTZ, CPCM(Water)//B3LYP-D3/6-31+G(d,p), CPCM(Water) level of theory. All units are in Hartrees.

## 9,10-Hydroxyanthraldehyde

**Table S13.** Computed energies for the isomers of the 9,10-hydroxyanthraldehyde calculated at the M06-2X/aug-cc-pVTZ, CPCM(Water)//B3LYP-D3/6-31+G(d,p), CPCM(Water) level of theory. All units are in Hartrees.

| Structure | E           | ZPE      | H           | T.S      | T. qh-S  | G(T)        | qh-G(T)     | SPE         |
|-----------|-------------|----------|-------------|----------|----------|-------------|-------------|-------------|
| HA        | -728.145769 | 0.207438 | -727.924355 | 0.053989 | 0.052617 | -727.978344 | -727.976972 | -728.048799 |
| AA        | -728.152361 | 0.207596 | -727.931059 | 0.053811 | 0.052275 | -727.984871 | -727.983335 | -728.053731 |
| AE        | -728.147042 | 0.208643 | -727.924971 | 0.052163 | 0.05139  | -727.977134 | -727.976361 | -728.052157 |

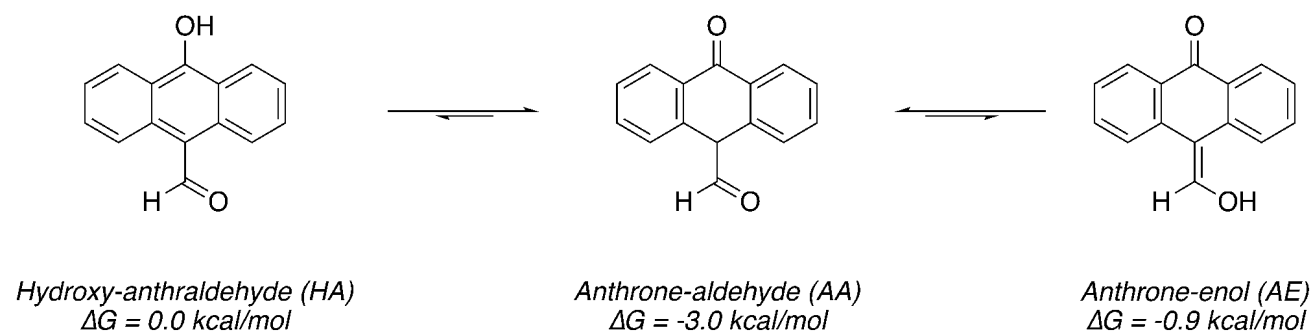

**Figure S62.** Free energies for the isomers of the 9,10-hydroxyanthraldehyde calculated at the M06-2X/aug-cc-pVTZ, CPCM(Water)//B3LYP-D3/6-31+G(d,p), CPCM(Water) level of theory. All units are in Hartrees.



## Calculated Coordinates – Benzylammoniums (Primary Amine)

### Methylamine

Methylamine

Charge: 0      Multiplicity: 1

Negative Frequency: None

|   |             |             |             |
|---|-------------|-------------|-------------|
| H | 1.14990800  | -0.81308700 | 0.34071300  |
| N | 0.75418900  | 0.00000000  | -0.12535400 |
| H | 1.14990600  | 0.81308800  | 0.34071200  |
| C | -0.71079700 | 0.00000000  | 0.01700100  |
| H | -1.12251900 | 0.88310600  | -0.48189300 |
| H | -1.12252600 | -0.88307400 | -0.48194600 |
| H | -1.06931500 | -0.00002900 | 1.05788800  |

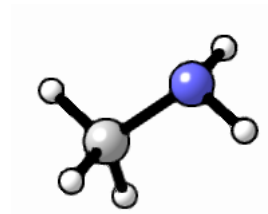

## 1,4-Benzene

Int1

Charge: 0      Multiplicity: 1

Negative Frequency: None

|   |             |             |             |
|---|-------------|-------------|-------------|
| C | 0.42530700  | 1.20654900  | -0.31070700 |
| C | 1.77916000  | 1.21523200  | -0.00327500 |
| C | -0.28707900 | 0.00004600  | -0.46981100 |
| C | 2.53232600  | -0.00002000 | 0.17259100  |
| C | 1.77911800  | -1.21523800 | -0.00333800 |
| C | 0.42526600  | -1.20649200 | -0.31077600 |
| H | 2.30861100  | -2.15913000 | 0.10652500  |
| H | -0.09837600 | -2.15364600 | -0.43734100 |
| C | -1.75263200 | 0.00007900  | -0.74347500 |
| H | -2.08705400 | 0.89008500  | -1.28129400 |
| H | -2.08706500 | -0.88980700 | -1.28148900 |
| H | -2.27558100 | -0.81541800 | 1.11710400  |
| H | -2.27554900 | 0.81513800  | 1.11730800  |
| C | -4.04970900 | -0.00001700 | 0.38818400  |
| H | -4.32942600 | 0.89419400  | -0.16762800 |
| H | -4.32945400 | -0.89407800 | -0.16785900 |
| H | -4.52200300 | -0.00013600 | 1.36994900  |
| N | -2.56192800 | -0.00006600 | 0.56692100  |
| O | 3.78855900  | -0.00005000 | 0.45881300  |
| H | -0.09830600 | 2.15372700  | -0.43721600 |
| H | 2.30868700  | 2.15909900  | 0.10663500  |

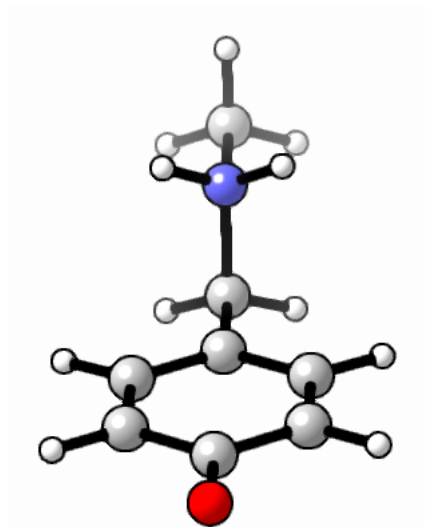

TS1

Charge: 0 Multiplicity: 1

Negative Frequency: -92.09

|   |             |             |             |
|---|-------------|-------------|-------------|
| C | 0.35295000  | 1.33706700  | -0.42075800 |
| C | 1.60140100  | 0.94504600  | -0.80413000 |
| C | -0.37166300 | 0.64746300  | 0.61939600  |
| C | 2.26684300  | -0.19829700 | -0.18615800 |
| C | 1.52057000  | -0.89256600 | 0.85850000  |
| C | 0.27154300  | -0.49061600 | 1.23021000  |
| H | 2.00096600  | -1.74659500 | 1.32753900  |
| H | -0.26663800 | -1.02888600 | 2.00728200  |
| C | -1.64716500 | 1.02929500  | 0.97909000  |
| H | -2.14719900 | 0.56806400  | 1.82224100  |
| H | -2.08263100 | 1.94457900  | 0.59686700  |
| H | -3.98676900 | -0.40824600 | 0.12706900  |
| H | -3.45407400 | 0.51795300  | -1.12586400 |
| C | -2.43255800 | -1.27444100 | -0.94049600 |
| H | -2.99773200 | -1.83523100 | -1.69608400 |
| H | -1.50052400 | -0.92083000 | -1.39136300 |
| H | -2.17129900 | -1.95188100 | -0.12325800 |
| N | -3.16288200 | -0.12837100 | -0.39776500 |
| O | 3.41934500  | -0.56490200 | -0.53611400 |
| H | -0.12320900 | 2.18954000  | -0.90025400 |
| H | 2.14300400  | 1.47165000  | -1.58484000 |

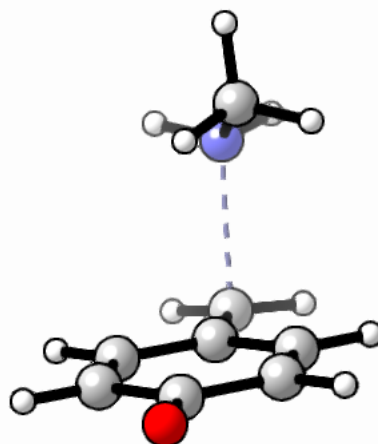

Int2

Charge: 0 Multiplicity: 1

Negative Frequency: None

|   |             |             |             |
|---|-------------|-------------|-------------|
| C | -0.64362900 | -1.24785800 | -0.00001300 |
| C | 0.70931200  | -1.25308400 | -0.00000600 |
| C | 1.47899600  | 0.00000000  | 0.00001700  |
| O | 2.72412700  | 0.00000000  | 0.00000300  |
| C | 0.70931200  | 1.25308400  | 0.00001400  |
| C | -0.64362900 | 1.24785800  | 0.00000700  |
| C | -1.40226100 | 0.00000000  | -0.00000500 |
| C | -2.75822400 | 0.00000000  | -0.00001100 |
| H | -3.32304500 | 0.92724100  | -0.00000400 |
| H | -3.32304800 | -0.92723900 | -0.00002000 |
| H | -1.20025700 | 2.18135000  | 0.00001000  |
| H | 1.27715900  | 2.17837800  | 0.00001900  |
| H | 1.27716000  | -2.17837800 | -0.00001500 |
| H | -1.20025500 | -2.18135100 | -0.00002600 |

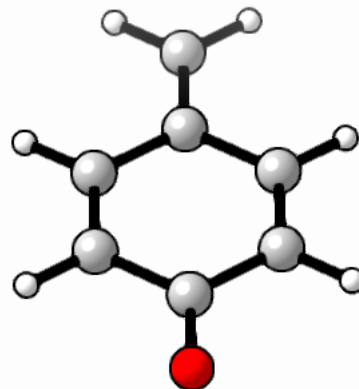

## 1,4-Naphthalene

Int1

Charge: 0    Multiplicity: 1  
Negative Frequency: None

|   |             |             |             |
|---|-------------|-------------|-------------|
| C | 0.75195800  | 2.73033800  | -0.17142600 |
| C | -0.17915300 | 1.72290400  | -0.35151600 |
| C | 0.17892200  | 0.34531400  | -0.25670200 |
| C | 1.55138600  | 0.03333000  | 0.02907200  |
| C | 2.47800300  | 1.08607800  | 0.20686800  |
| C | 2.09858000  | 2.41474000  | 0.11480800  |
| H | 0.44245800  | 3.76881300  | -0.25303600 |
| H | -1.20200300 | 2.00519900  | -0.58569600 |
| C | -0.76657300 | -0.72162800 | -0.42864400 |
| C | 2.01732400  | -1.36276200 | 0.13834300  |
| H | 3.50739800  | 0.81608400  | 0.42096000  |
| H | 2.82664200  | 3.20808700  | 0.25808100  |
| C | 1.02167600  | -2.36214400 | -0.05213300 |
| C | -0.31041400 | -2.03673800 | -0.31747200 |
| H | 1.32621400  | -3.40351500 | 0.01392500  |
| H | -1.02640500 | -2.84727200 | -0.44967200 |
| C | -2.21107000 | -0.45701100 | -0.68039500 |
| H | -2.40592400 | 0.36008500  | -1.37915900 |
| H | -2.73416400 | -1.34674000 | -1.03515200 |
| H | -2.82494300 | -0.81261700 | 1.29153700  |
| H | -2.45565700 | 0.75183800  | 1.02339300  |
| C | -4.39642100 | 0.26374500  | 0.44626600  |
| H | -4.81851000 | 0.51950600  | 1.41769400  |
| H | -4.48930700 | 1.10500300  | -0.23963300 |
| H | -4.89332600 | -0.61485100 | 0.03623800  |
| N | -2.94266300 | -0.05201000 | 0.61619300  |
| O | 3.24260800  | -1.63531700 | 0.38809600  |

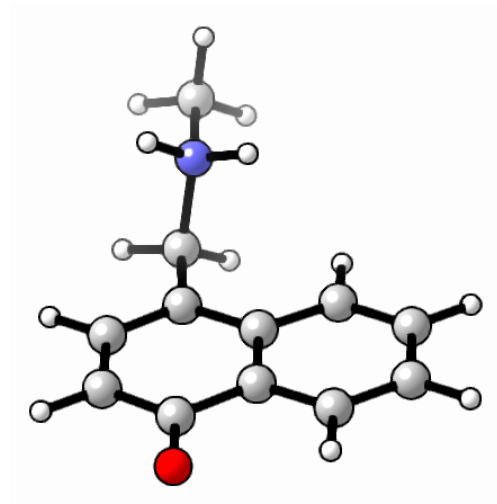

TS1

Charge: 0 Multiplicity: 1

Negative Frequency: -200.87

|   |             |             |             |
|---|-------------|-------------|-------------|
| C | -1.30721600 | 2.63423600  | -0.08833000 |
| C | -0.19784600 | 1.88731600  | -0.45775000 |
| C | -0.21863400 | 0.47145100  | -0.42684100 |
| C | -1.41334600 | -0.16671200 | 0.01458100  |
| C | -2.53027200 | 0.61066700  | 0.38431500  |
| C | -2.48818600 | 1.99570600  | 0.33529200  |
| H | -1.25918300 | 3.71895000  | -0.12430100 |
| H | 0.69929800  | 2.40942700  | -0.77275200 |
| C | 0.93180400  | -0.34200100 | -0.81296800 |
| C | -1.50687300 | -1.64440300 | 0.10660400  |
| H | -3.42482100 | 0.09169600  | 0.71289300  |
| H | -3.35438000 | 2.58348200  | 0.62428900  |
| C | -0.32427000 | -2.38847900 | -0.25441500 |
| C | 0.81916600  | -1.76044400 | -0.67477400 |
| H | -0.37474200 | -3.47099500 | -0.18304000 |
| H | 1.68754800  | -2.36192200 | -0.93628800 |
| C | 2.13787100  | 0.19886100  | -1.25088900 |
| H | 2.90726300  | -0.47225000 | -1.61621800 |
| H | 2.20867500  | 1.21578200  | -1.61427000 |
| O | -2.56374800 | -2.21217300 | 0.48708600  |
| H | 4.31763100  | 0.71826500  | 0.17386600  |
| H | 3.09926300  | 1.69274500  | 0.70394700  |
| C | 3.05173400  | -0.20099500 | 1.54359200  |
| H | 3.38936000  | -1.19875200 | 1.25403200  |
| H | 3.53630300  | 0.08221200  | 2.48462400  |
| H | 1.96973000  | -0.23858900 | 1.69710100  |
| N | 3.34063500  | 0.73659000  | 0.45556200  |

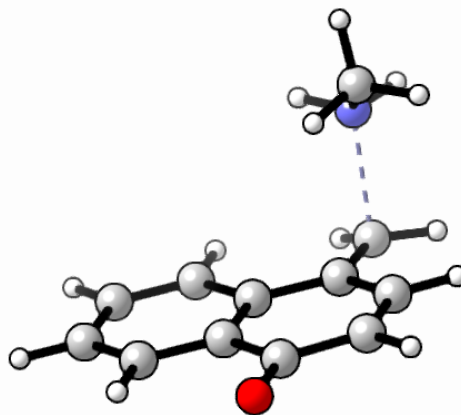

Int2

Charge: 0 Multiplicity: 1

Negative Frequency: None

|   |             |             |             |
|---|-------------|-------------|-------------|
| C | 2.61095500  | 0.93255000  | -0.00018600 |
| C | 1.34823700  | 1.51755100  | -0.00022400 |
| C | 0.18201400  | 0.72926200  | -0.00004100 |
| C | 0.32777000  | -0.68026100 | 0.00008300  |
| C | 1.60834500  | -1.25980600 | 0.00013200  |
| C | 2.74691600  | -0.46372300 | 0.00001600  |
| H | 3.73303400  | -0.91751500 | 0.00005300  |
| H | 1.68403100  | -2.34190600 | 0.00024100  |
| C | -0.86150600 | -1.57486100 | 0.00005700  |
| O | -0.74936800 | -2.81177100 | 0.00025800  |
| C | -2.17798800 | -0.93698700 | -0.00029700 |
| C | -2.31294200 | 0.40787600  | -0.00033800 |
| C | -1.17621300 | 1.32368300  | -0.00000600 |
| C | -1.42284400 | 2.65547200  | 0.00047600  |
| H | -0.63932200 | 3.40385000  | 0.00093000  |
| H | -2.44314500 | 3.02543700  | 0.00046600  |
| H | -3.30536000 | 0.85130200  | -0.00054100 |
| H | -3.04058100 | -1.59584500 | -0.00046900 |
| H | 1.27633500  | 2.59924700  | -0.00043800 |
| H | 3.49348700  | 1.56506000  | -0.00033800 |

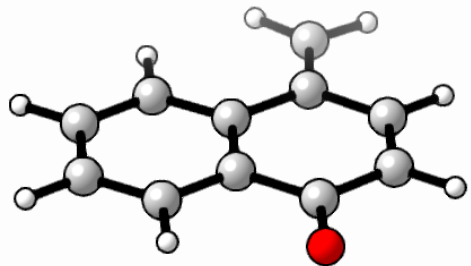

## 1,4-Anthracene

Int1

Charge: 0 Multiplicity: 1

Negative Frequency: None

|   |             |             |             |
|---|-------------|-------------|-------------|
| C | 1.75461200  | -0.80626900 | -0.21629400 |
| C | 0.38677100  | -1.02677700 | -0.45666600 |
| C | -0.57050300 | 0.00148400  | -0.38067500 |
| C | -0.10664000 | 1.33481800  | -0.04358900 |
| C | 1.24722600  | 1.55189500  | 0.19534500  |
| C | 2.20216300  | 0.52042000  | 0.12393100  |
| H | 0.09143800  | -2.03641400 | -0.73146900 |
| C | -1.97621300 | -0.20756100 | -0.61604300 |
| C | -1.04814300 | 2.48154300  | 0.04582500  |
| H | 1.56469200  | 2.56038000  | 0.44422000  |
| C | -2.41058700 | 2.18334600  | -0.21797200 |
| C | -2.83567300 | 0.88524300  | -0.52460900 |
| H | -3.13069500 | 2.99578600  | -0.17038900 |
| H | -3.89775300 | 0.72111700  | -0.70309600 |
| C | -2.52051700 | -1.56180700 | -0.90305400 |
| H | -3.54782000 | -1.52292700 | -1.26861500 |
| H | -1.92383300 | -2.14433500 | -1.61001500 |
| H | -2.83911900 | -3.39973900 | 0.10033400  |
| H | -1.63256000 | -2.50842100 | 0.75525000  |
| C | -3.50958200 | -1.95136300 | 1.42987000  |
| H | -3.44956800 | -2.62117200 | 2.28702200  |
| H | -3.20569000 | -0.94358400 | 1.70743700  |
| H | -4.52029600 | -1.94203800 | 1.02256400  |
| N | -2.57837400 | -2.44643900 | 0.36820800  |
| O | -0.62651900 | 3.64970800  | 0.34208400  |
| C | 2.72601200  | -1.85422200 | -0.29772200 |
| H | 2.39345300  | -2.85681200 | -0.55553500 |
| C | 4.05617400  | -1.60338600 | -0.05460300 |
| H | 4.78145700  | -2.40957800 | -0.11984000 |
| C | 4.49749300  | -0.28965800 | 0.28428500  |
| H | 5.55185000  | -0.11023600 | 0.47305400  |
| C | 3.59151400  | 0.74215300  | 0.37004900  |
| H | 3.92056500  | 1.74621700  | 0.62648500  |

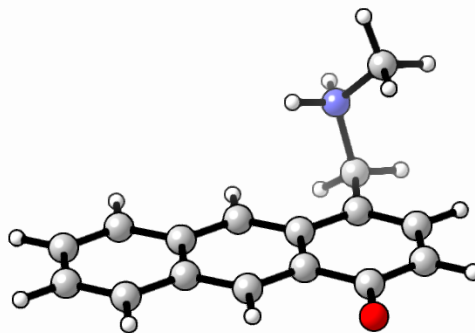



TS1

Charge: 0 Multiplicity: 1

Negative Frequency: -231.78

|   |             |             |             |
|---|-------------|-------------|-------------|
| C | 1.76673900  | -0.77707800 | -0.26240900 |
| C | 0.40373100  | -1.00612900 | -0.54447700 |
| C | -0.55344000 | 0.00742200  | -0.47309600 |
| C | -0.11968900 | 1.32348600  | -0.07158800 |
| C | 1.22050100  | 1.56035000  | 0.20728700  |
| C | 2.19150000  | 0.54249100  | 0.12110200  |
| H | 0.11225200  | -2.01422600 | -0.82230600 |
| C | -1.96927700 | -0.21589000 | -0.76531200 |
| C | -1.09118100 | 2.44360300  | 0.06837700  |
| H | 1.51592800  | 2.56186800  | 0.50559800  |
| C | -2.47356200 | 2.13151900  | -0.18709800 |
| C | -2.86951400 | 0.87239500  | -0.56709300 |
| H | -3.19618900 | 2.93434000  | -0.07528100 |
| H | -3.92630700 | 0.68814900  | -0.75152700 |
| C | -2.47805900 | -1.45091600 | -1.16987200 |
| H | -3.52176700 | -1.50903400 | -1.45951800 |
| H | -1.84175200 | -2.20619100 | -1.61420000 |
| O | -0.71241900 | 3.59589900  | 0.40143100  |
| C | 3.57058400  | 0.77299300  | 0.40634500  |
| H | 3.88377400  | 1.77285300  | 0.69558400  |
| C | 4.48737700  | -0.24989800 | 0.31818600  |
| H | 5.53499800  | -0.06564600 | 0.53682300  |
| C | 4.06773300  | -1.55770600 | -0.06001500 |
| H | 4.80171700  | -2.35573700 | -0.12514500 |
| C | 2.74506500  | -1.81481300 | -0.34148400 |
| H | 2.42736500  | -2.81350900 | -0.63000000 |
| H | -3.49515600 | -3.36549800 | 0.28771900  |
| H | -1.90696500 | -3.18267000 | 0.68473600  |
| C | -3.15016300 | -1.84540700 | 1.66519900  |
| H | -3.20068300 | -2.41322300 | 2.60037900  |
| H | -2.41063500 | -1.04716000 | 1.77044900  |
| H | -4.12234400 | -1.38734800 | 1.47029100  |
| N | -2.77784900 | -2.68324200 | 0.52151800  |

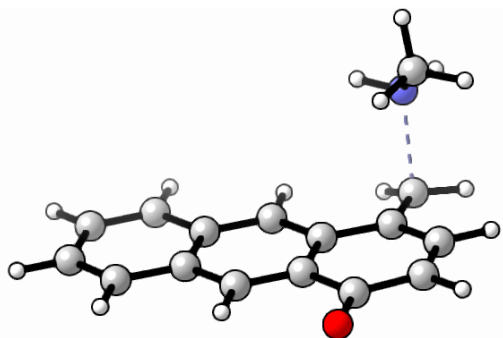

Int2

Charge: 0 Multiplicity: 1

Negative Frequency: None

|   |             |             |             |
|---|-------------|-------------|-------------|
| C | -1.56731900 | 0.72849000  | 0.00004300  |
| C | -0.32026700 | 1.39859000  | 0.00015300  |
| C | 0.88507200  | 0.71305000  | 0.00003300  |
| C | 0.85182400  | -0.72374500 | 0.00008400  |
| C | -0.35851500 | -1.39756200 | -0.00006800 |
| C | -1.59000800 | -0.70657800 | -0.00013000 |
| C | -2.84387000 | -1.38235700 | -0.00025900 |
| C | -4.02262900 | -0.66913600 | -0.00022700 |
| C | -4.00116300 | 0.75233600  | -0.00004200 |
| C | -2.80404400 | 1.43532400  | 0.00009900  |
| H | -2.78931400 | 2.52174300  | 0.00024100  |
| H | -4.93846800 | 1.30057600  | -0.00001500 |
| H | -4.97519100 | -1.19011300 | -0.00033100 |
| H | -2.85402600 | -2.46878100 | -0.00038000 |
| H | -0.35020300 | -2.48315100 | -0.00003900 |
| C | 2.11068100  | -1.51919200 | 0.00063700  |
| O | 2.10232000  | -2.76064200 | -0.00035100 |
| C | 3.36996600  | -0.77482200 | 0.00111400  |
| C | 3.39755700  | 0.57668000  | 0.00087800  |
| C | 2.19697900  | 1.40762500  | -0.00008900 |
| C | 2.35045000  | 2.75311600  | -0.00148200 |
| H | 1.51661600  | 3.44517500  | -0.00277100 |
| H | 3.34262400  | 3.19275900  | -0.00146400 |
| H | 4.35378600  | 1.09385200  | 0.00116800  |
| H | 4.28333900  | -1.36127800 | 0.00156200  |
| H | -0.33601000 | 2.48344600  | 0.00037700  |

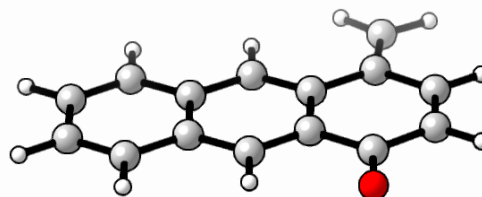

## 9,10-Anthracene

Int1

Charge: 0    Multiplicity: 1  
Negative Frequency: None

|   |             |             |             |
|---|-------------|-------------|-------------|
| C | 3.71358500  | 0.34816500  | -0.25766400 |
| C | 2.49207000  | 0.95819600  | -0.45921000 |
| C | 1.25225500  | 0.24862100  | -0.32061800 |
| C | 1.34759400  | -1.14161500 | 0.03784300  |
| C | 2.61728700  | -1.73645800 | 0.23915700  |
| C | 3.78965900  | -1.01906200 | 0.10148300  |
| H | 4.62492000  | 0.92798200  | -0.37858100 |
| H | 2.49493500  | 2.00473300  | -0.74722100 |
| C | -0.01847200 | 0.86685300  | -0.51632100 |
| C | 0.15405000  | -1.96394900 | 0.20147100  |
| H | 2.63789900  | -2.78758600 | 0.50911800  |
| H | 4.75401700  | -1.49158300 | 0.26264100  |
| C | -1.12851700 | -1.30244100 | -0.00890300 |
| C | -1.20645500 | 0.09358700  | -0.35463200 |
| C | -0.07886600 | 2.31771400  | -0.84611300 |
| H | 0.70619500  | 2.64224600  | -1.53163500 |
| H | -1.02897900 | 2.63828500  | -1.26871800 |
| H | 1.01950100  | 2.96519000  | 0.82856600  |
| H | 0.19482400  | 4.18937600  | 0.11788600  |
| C | -0.95219700 | 3.07740900  | 1.44553100  |
| H | -1.02256500 | 2.02884500  | 1.72921900  |
| H | -0.68428300 | 3.69096100  | 2.30499600  |
| H | -1.89295500 | 3.41748900  | 1.01471000  |
| N | 0.11875700  | 3.20984800  | 0.40826100  |
| O | 0.22855900  | -3.19133400 | 0.51468600  |
| C | -2.52546000 | 0.63396900  | -0.51938200 |
| H | -2.65582600 | 1.67959100  | -0.77363400 |
| C | -3.65991800 | -0.13482800 | -0.36462300 |
| H | -4.63595000 | 0.32352600  | -0.50187600 |
| C | -2.31450300 | -2.06368500 | 0.14328800  |
| H | -2.20268600 | -3.11131300 | 0.40384500  |
| C | -3.56624100 | -1.50746600 | -0.02782800 |
| H | -4.46404500 | -2.10606600 | 0.09450400  |

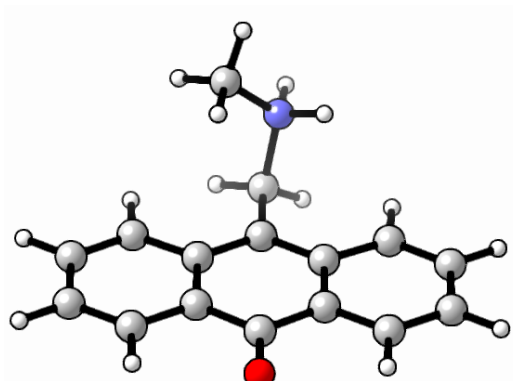

TS1

Charge: 0 Multiplicity: 1

Negative Frequency: -302.86

|   |             |             |             |
|---|-------------|-------------|-------------|
| C | -3.71391700 | 0.26896100  | -0.19837800 |
| C | -2.50633500 | 0.89947400  | -0.44360000 |
| C | -1.26626600 | 0.20335500  | -0.36842600 |
| C | -1.32174800 | -1.17389500 | 0.00025300  |
| C | -2.56639500 | -1.79896500 | 0.24239900  |
| C | -3.75543300 | -1.09876700 | 0.14516800  |
| H | -4.63627600 | 0.83952700  | -0.26511400 |
| H | -2.52205400 | 1.95527700  | -0.68900100 |
| C | 0.00449800  | 0.84797200  | -0.64187300 |
| C | -0.09690400 | -1.97048500 | 0.14857100  |
| H | -2.55953500 | -2.84930000 | 0.51447200  |
| H | -4.70511000 | -1.58841200 | 0.33817800  |
| C | 1.18227400  | -1.26971500 | -0.02320700 |
| C | 1.22866900  | 0.10824000  | -0.39243900 |
| C | 0.04554700  | 2.17576400  | -1.10540000 |
| H | 0.97033900  | 2.56080900  | -1.51586100 |
| H | -0.82914200 | 2.59912600  | -1.58387100 |
| O | -0.14135600 | -3.19301900 | 0.43012600  |
| C | 2.52007300  | 0.69911000  | -0.50392300 |
| H | 2.61750100  | 1.74865700  | -0.75675300 |
| C | 2.37822700  | -1.99261100 | 0.19429800  |
| H | 2.29197500  | -3.03847600 | 0.46970100  |
| C | 3.61707000  | -1.39151400 | 0.06871900  |
| H | 4.52830300  | -1.95558900 | 0.24296100  |
| C | 3.67746700  | -0.02599900 | -0.28233200 |
| H | 4.64099500  | 0.46790300  | -0.37450400 |
| H | 0.51105200  | 4.30944900  | 0.11785300  |
| H | -0.97930300 | 3.74794500  | 0.52435100  |
| C | 0.53927000  | 2.88771100  | 1.63835000  |
| H | 0.32708700  | 3.50835400  | 2.51364900  |
| H | 0.08959300  | 1.90093700  | 1.77569400  |
| H | 1.61734700  | 2.76398600  | 1.52941400  |
| N | -0.00407300 | 3.48030600  | 0.40696400  |

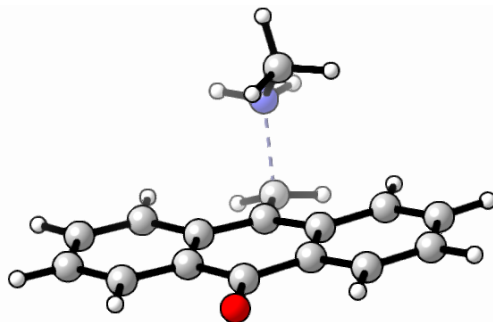

Int2

Charge: 0 Multiplicity: 1

Negative Frequency: None

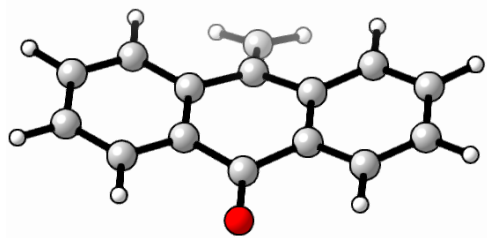

|   |             |             |             |
|---|-------------|-------------|-------------|
| C | -3.67902800 | 0.65114600  | -0.33255400 |
| C | -2.49336800 | 1.37030500  | -0.21084800 |
| C | -1.26626800 | 0.71591400  | 0.00785200  |
| C | -1.26657200 | -0.69659700 | 0.07130300  |
| C | -2.47125900 | -1.41344900 | -0.04051100 |
| C | -3.67469600 | -0.74872500 | -0.23918500 |
| H | -4.60059500 | -1.30716500 | -0.33429200 |
| H | -2.43483700 | -2.49573200 | 0.02074500  |
| C | 0.00000000  | -1.45266500 | 0.22846200  |
| O | 0.00000000  | -2.67396600 | 0.43067100  |
| C | 1.26657200  | -0.69659700 | 0.07130200  |
| C | 2.47125900  | -1.41344900 | -0.04051100 |
| C | 3.67469600  | -0.74872500 | -0.23918500 |
| C | 3.67902800  | 0.65114600  | -0.33255400 |
| C | 2.49336800  | 1.37030500  | -0.21084800 |
| C | 1.26626800  | 0.71591400  | 0.00785200  |
| C | 0.00000000  | 1.46597600  | 0.19485300  |
| C | 0.00000000  | 2.75368100  | 0.60250500  |
| H | -0.91870100 | 3.29506800  | 0.79404800  |
| H | 0.91870200  | 3.29506800  | 0.79404700  |
| H | 2.52253200  | 2.44987800  | -0.30725300 |
| H | 4.60999500  | 1.18127700  | -0.50973100 |
| H | 4.60059500  | -1.30716500 | -0.33429300 |
| H | 2.43483700  | -2.49573200 | 0.02074500  |
| H | -2.52253200 | 2.44987800  | -0.30725400 |
| H | -4.60999400 | 1.18127700  | -0.50973100 |

## 1,4-Tetracene

Int1

Charge: 0      Multiplicity: 1

Negative Frequency: None

|   |             |             |             |
|---|-------------|-------------|-------------|
| C | -0.71765100 | 0.35085600  | -0.20924500 |
| C | 0.63085800  | 0.75110100  | -0.36022200 |
| C | 1.69978900  | -0.14849500 | -0.27298700 |
| C | 1.39462500  | -1.55216400 | -0.01913700 |
| C | 0.07858600  | -1.95236800 | 0.13185300  |
| C | -1.00736600 | -1.04559400 | 0.04961300  |
| H | 0.81051200  | 1.80249100  | -0.56984500 |
| C | 3.08030300  | 0.24283000  | -0.41466800 |
| C | 2.47622800  | -2.57386200 | 0.07659500  |
| H | -0.11687000 | -3.00439100 | 0.31888000  |
| C | 3.79997400  | -2.09127100 | -0.08383200 |
| C | 4.06693100  | -0.73456300 | -0.31110700 |
| H | 4.61646100  | -2.80559400 | -0.02472700 |
| H | 5.10700400  | -0.42732500 | -0.41734400 |
| C | 3.45998300  | 1.66785000  | -0.61279900 |
| H | 4.49346700  | 1.77826300  | -0.94499000 |
| H | 2.81355800  | 2.21440900  | -1.30430300 |
| H | 2.44842400  | 2.30137800  | 1.11895700  |
| H | 4.03577700  | 2.03227900  | 1.36984100  |
| C | 3.63878900  | 3.92469400  | 0.59096800  |
| H | 3.58563200  | 4.37584500  | 1.58117500  |
| H | 4.63154800  | 4.06275200  | 0.16366200  |
| H | 2.88234300  | 4.35696100  | -0.06316300 |
| N | 3.37582800  | 2.45633100  | 0.71212700  |
| O | 2.19051600  | -3.79816500 | 0.29000800  |
| C | -1.79292300 | 1.26036700  | -0.30104700 |
| H | -1.58268200 | 2.30970000  | -0.49653700 |
| C | -3.11901100 | 0.84807300  | -0.14691200 |
| C | -3.40594400 | -0.55101700 | 0.11500400  |
| C | -2.34460900 | -1.45656800 | 0.20556500  |
| H | -2.55436300 | -2.50610900 | 0.40012100  |
| C | -4.22041600 | 1.76458100  | -0.23825900 |
| H | -4.00788300 | 2.81243900  | -0.43463200 |
| C | -5.51279200 | 1.33398700  | -0.08213600 |
| H | -6.33464200 | 2.04054600  | -0.15411800 |
| C | -4.77301800 | -0.95601400 | 0.27111700  |
| H | -4.98359100 | -2.00446500 | 0.46691400  |
| C | -5.79470400 | -0.04604900 | 0.17638700  |
| H | -6.82540000 | -0.36642300 | 0.29666800  |

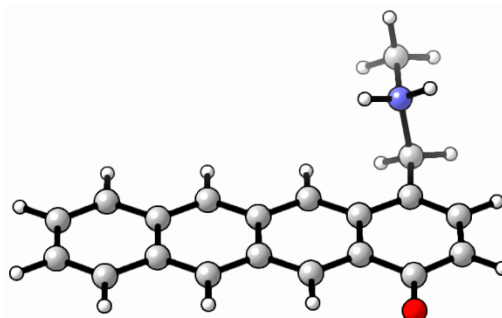

TS1

Charge: 0 Multiplicity: 1

Negative Frequency: -242.30

|   |             |             |             |
|---|-------------|-------------|-------------|
| C | 0.78170500  | -0.40514600 | -0.32092300 |
| C | -0.54517800 | -0.85069400 | -0.55772100 |
| C | -1.64210200 | -0.00229800 | -0.47727400 |
| C | -1.41189400 | 1.38293800  | -0.10886100 |
| C | -0.12775100 | 1.83572600  | 0.12569000  |
| C | 1.00100600  | 0.98227200  | 0.02821400  |
| H | -0.68027200 | -1.89826200 | -0.80859000 |
| C | -3.01413300 | -0.44780200 | -0.72368700 |
| C | -2.54850000 | 2.33737800  | 0.04244000  |
| H | 0.01187800  | 2.87735000  | 0.39883500  |
| C | -3.86845000 | 1.80354100  | -0.16454500 |
| C | -4.06747400 | 0.48885400  | -0.51299800 |
| H | -4.70729600 | 2.48225200  | -0.04345300 |
| H | -5.08652800 | 0.13649500  | -0.66199500 |
| C | -3.33350900 | -1.75543200 | -1.09730400 |
| H | -4.36281500 | -1.97999800 | -1.35624200 |
| H | -2.59912100 | -2.40241000 | -1.56150800 |
| O | -2.34833100 | 3.54152200  | 0.34383500  |
| C | 2.31020100  | 1.43755500  | 0.26567800  |
| H | 2.46771500  | 2.48111400  | 0.52826600  |
| C | 3.41103500  | 0.57924800  | 0.17262300  |
| C | 3.19394900  | -0.81183400 | -0.17626800 |
| C | 1.89173100  | -1.26632100 | -0.41206900 |
| H | 1.73280700  | -2.30994700 | -0.67378500 |
| C | 4.75151300  | 1.02838600  | 0.41156100  |
| H | 4.91033200  | 2.07148500  | 0.67268200  |
| C | 5.81239200  | 0.16453800  | 0.31358600  |
| H | 6.82292500  | 0.51733600  | 0.49700800  |
| C | 4.33278000  | -1.67912800 | -0.26761200 |
| H | 4.17159300  | -2.72168800 | -0.52923100 |
| C | 5.59898400  | -1.20793100 | -0.03070000 |
| H | 6.45145300  | -1.87692600 | -0.10355600 |
| H | -3.95429600 | -3.79755300 | 0.38077900  |
| H | -2.42758600 | -3.30935800 | 0.76148300  |
| C | -3.89626800 | -2.22240100 | 1.73869500  |
| H | -3.82738600 | -2.77760200 | 2.68006600  |
| H | -3.32344700 | -1.29544800 | 1.82643300  |
| H | -4.94033200 | -1.96357100 | 1.54937100  |
| N | -3.37902800 | -2.98773300 | 0.60023000  |

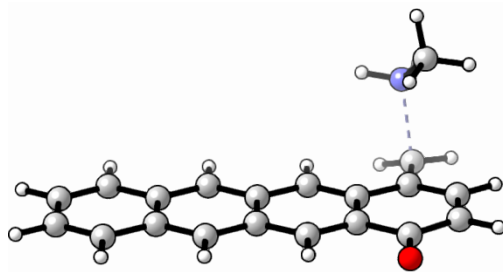

Int2

Charge: 0 Multiplicity: 1

Negative Frequency: None

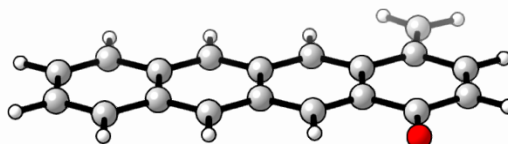

|   |             |             |             |
|---|-------------|-------------|-------------|
| C | 0.40988400  | 0.71896900  | 0.00026100  |
| C | 1.63007100  | 1.41220700  | 0.00070900  |
| C | 2.85657100  | 0.73318300  | 0.00043900  |
| C | 4.10900300  | 1.42794800  | 0.00084900  |
| C | 5.29570900  | 0.73849000  | 0.00056200  |
| C | 5.30597000  | -0.69071600 | -0.00015500 |
| C | 4.12819300  | -1.39485700 | -0.00055700 |
| C | 2.86727500  | -0.71534800 | -0.00028200 |
| C | 1.64937700  | -1.40774400 | -0.00067900 |
| C | 0.42227800  | -0.72619200 | -0.00041800 |
| C | -0.82395900 | -1.40781400 | -0.00064200 |
| C | -2.02330500 | -0.72753100 | -0.00044700 |
| C | -2.04671600 | 0.71974200  | -0.00014300 |
| C | -0.84378100 | 1.39552100  | 0.00044500  |
| H | -0.82127100 | 2.48035400  | 0.00118400  |
| C | -3.35567300 | 1.42029900  | -0.00026300 |
| C | -3.50565700 | 2.76659200  | -0.00259000 |
| H | -2.66991800 | 3.45644700  | -0.00495100 |
| H | -4.49665500 | 3.20873600  | -0.00233400 |
| C | -4.55950100 | 0.59364000  | 0.00174500  |
| C | -4.54091100 | -0.75824700 | 0.00191500  |
| C | -3.28786600 | -1.51301600 | -0.00009400 |
| O | -3.29108600 | -2.75491600 | -0.00046500 |
| H | -5.45887700 | -1.33753000 | 0.00314600  |
| H | -5.51324400 | 1.11553300  | 0.00276700  |
| H | -0.83955500 | -2.49335500 | -0.00087800 |
| H | 1.65283200  | -2.49488900 | -0.00118200 |
| H | 4.13334500  | -2.48148900 | -0.00110000 |
| H | 6.25588300  | -1.21673400 | -0.00037600 |
| H | 6.23837200  | 1.27753300  | 0.00087800  |
| H | 4.10127700  | 2.51455900  | 0.00139300  |
| H | 1.62474100  | 2.49940200  | 0.00123600  |



## 5,12-Tetracene

Int1

Charge: 0      Multiplicity: 1  
Negative Frequency: None

|   |             |             |             |
|---|-------------|-------------|-------------|
| C | 2.69915000  | 0.46822900  | -0.16130700 |
| C | 1.41562000  | 1.01617300  | -0.29607400 |
| C | 0.23594400  | 0.23630100  | -0.23689200 |
| C | 0.40615900  | -1.18684200 | -0.00556800 |
| C | 1.68290600  | -1.73195100 | 0.12649500  |
| C | 2.84710600  | -0.95102500 | 0.05493600  |
| H | 1.35860700  | 2.08932500  | -0.45288000 |
| C | -1.07802100 | 0.78316400  | -0.38277900 |
| C | -0.75342200 | -2.08508100 | 0.10050200  |
| H | 1.76263900  | -2.80211900 | 0.29424200  |
| C | -2.06961600 | -1.47170100 | -0.00109500 |
| C | -2.21732800 | -0.05687800 | -0.23242700 |
| C | -1.24502000 | 2.23798100  | -0.63660000 |
| H | -0.42087200 | 2.68296500  | -1.19479800 |
| H | -2.16580300 | 2.49415900  | -1.15995400 |
| H | -2.08150400 | 2.66851900  | 1.24160400  |
| H | -0.46014200 | 2.82504300  | 1.22257900  |
| C | -1.45045400 | 4.52030800  | 0.52509900  |
| H | -0.59346500 | 4.89030600  | -0.03693900 |
| H | -2.37301400 | 4.71893200  | -0.01963800 |
| H | -1.48490300 | 4.98303400  | 1.51094800  |
| N | -1.30567200 | 3.03973800  | 0.68645300  |
| O | -0.60395500 | -3.32698400 | 0.28295000  |
| C | 3.88629300  | 1.26960000  | -0.22777400 |
| H | 3.78561700  | 2.34005400  | -0.39000200 |
| C | 5.13018300  | 0.70147200  | -0.09178100 |
| H | 6.01888100  | 1.32422300  | -0.14612800 |
| C | 5.27280800  | -0.70400600 | 0.12075800  |
| H | 6.26491800  | -1.13297400 | 0.22552600  |
| C | 4.15703100  | -1.50463700 | 0.19192100  |
| H | 4.25415600  | -2.57547300 | 0.35415200  |
| C | -3.56425100 | 0.43844700  | -0.29137900 |
| H | -3.74850500 | 1.49608600  | -0.44896100 |
| C | -4.65774300 | -0.39026600 | -0.15013800 |
| H | -5.65684200 | 0.03495000  | -0.20184000 |
| C | -3.21510600 | -2.29450300 | 0.13663700  |
| H | -3.05020400 | -3.35400100 | 0.30623200  |
| C | -4.49497500 | -1.78139600 | 0.06572300  |
| H | -5.36180700 | -2.42564600 | 0.17754800  |

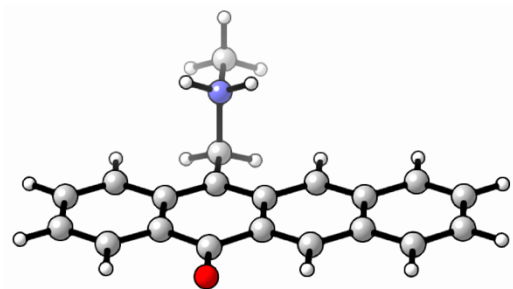

TS1

Charge: 0 Multiplicity: 1

Negative Frequency: -336.52

|   |             |             |             |
|---|-------------|-------------|-------------|
| C | -2.72483200 | 0.48183600  | -0.22831100 |
| C | -1.45324000 | 1.04549500  | -0.44289300 |
| C | -0.26919200 | 0.29391800  | -0.38459400 |
| C | -0.39577500 | -1.10544100 | -0.05643400 |
| C | -1.64873300 | -1.67420600 | 0.15444000  |
| C | -2.83358900 | -0.92132700 | 0.07519600  |
| H | -1.41605600 | 2.10902300  | -0.65376700 |
| C | 1.04223800  | 0.87183900  | -0.62700700 |
| C | 0.79613700  | -1.96525000 | 0.08024400  |
| H | -1.69810900 | -2.73212700 | 0.39431800  |
| C | 2.10649300  | -1.31882300 | -0.04473000 |
| C | 2.22111000  | 0.06776700  | -0.37121900 |
| C | 1.15600500  | 2.20679800  | -1.06430700 |
| H | 2.10906700  | 2.55248800  | -1.44524300 |
| H | 0.31699500  | 2.66401300  | -1.57660500 |
| O | 0.68683900  | -3.19105900 | 0.31481000  |
| C | -4.12405600 | -1.49115900 | 0.29422200  |
| H | -4.19376500 | -2.55168900 | 0.52259000  |
| C | -5.25734900 | -0.71464200 | 0.21912100  |
| H | -6.23582200 | -1.15472700 | 0.38660200  |
| C | -5.15231400 | 0.67614100  | -0.07847900 |
| H | -6.05459300 | 1.27856500  | -0.13412100 |
| C | -3.92448000 | 1.25788000  | -0.29469300 |
| H | -3.85027800 | 2.31839500  | -0.52168300 |
| C | 3.54258200  | 0.59861100  | -0.43816500 |
| H | 3.69441300  | 1.64961400  | -0.65498000 |
| C | 3.26329400  | -2.10350600 | 0.17195300  |
| H | 3.12283700  | -3.15218100 | 0.41276100  |
| C | 4.65984100  | -0.18665800 | -0.21759800 |
| H | 5.64656800  | 0.26503500  | -0.27527600 |
| C | 4.53112600  | -1.55872000 | 0.08881100  |
| H | 5.41171600  | -2.16949500 | 0.26249200  |
| H | 1.62013400  | 4.30373000  | 0.16434600  |
| H | 0.12324600  | 3.74746300  | 0.55076600  |
| C | 1.62364100  | 2.86834300  | 1.67315000  |
| H | 1.40341200  | 3.48486900  | 2.54896300  |
| H | 1.16562000  | 1.88368600  | 1.79607500  |
| H | 2.70222800  | 2.73981800  | 1.57609400  |
| N | 1.09774900  | 3.47409000  | 0.43942100  |

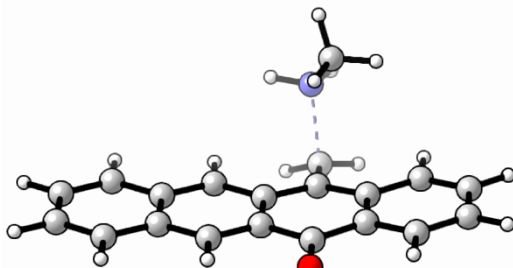

Int2

Charge: 0 Multiplicity: 1

Negative Frequency: None

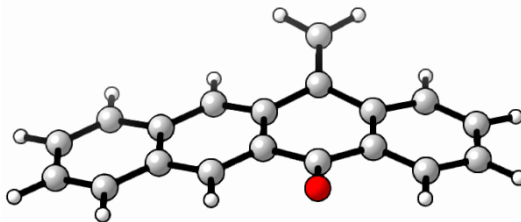

|   |             |             |             |
|---|-------------|-------------|-------------|
| C | -2.59612200 | 0.71158000  | -0.09507800 |
| C | -1.36324000 | 1.40596300  | -0.01752300 |
| C | -0.15805100 | 0.74374300  | 0.15418600  |
| C | -0.16812000 | -0.68870700 | 0.21581000  |
| C | -1.36372700 | -1.38686900 | 0.15582900  |
| C | -2.59999100 | -0.72055100 | 0.00447900  |
| C | -3.83833900 | -1.42043200 | -0.06897400 |
| C | -5.02108600 | -0.73314600 | -0.23466600 |
| C | -5.01775400 | 0.68452500  | -0.33755400 |
| C | -3.83518200 | 1.39030100  | -0.27158500 |
| H | -3.83473900 | 2.47401000  | -0.34970900 |
| H | -5.95745000 | 1.21253100  | -0.46940900 |
| H | -5.96208700 | -1.27192200 | -0.28940800 |
| H | -3.83333000 | -2.50428700 | 0.00681300  |
| H | -1.33909500 | -2.47074900 | 0.21174700  |
| C | 1.10169600  | -1.45270900 | 0.30100000  |
| O | 1.11016500  | -2.67185000 | 0.51404100  |
| C | 2.35867700  | -0.70409800 | 0.05050900  |
| C | 3.54453700  | -1.42912700 | -0.16230800 |
| C | 4.73461500  | -0.77195300 | -0.44926100 |
| C | 4.74409700  | 0.62855800  | -0.52977700 |
| C | 3.57782000  | 1.35623700  | -0.30813800 |
| C | 2.36667700  | 0.70944300  | 0.00058400  |
| C | 1.12792200  | 1.46963200  | 0.29998800  |
| C | 1.17532200  | 2.73649200  | 0.76461900  |
| H | 2.11336500  | 3.25762400  | 0.91539900  |
| H | 0.27768400  | 3.27649300  | 1.04263700  |
| H | 3.60663300  | 2.43671600  | -0.39538200 |
| H | 5.66292900  | 1.15268700  | -0.77513600 |
| H | 5.64501900  | -1.33701200 | -0.62259100 |
| H | 3.50399000  | -2.51168000 | -0.10820800 |
| H | -1.38272800 | 2.48709100  | -0.11191000 |

## 6,13-Pentacene

Int1

Charge: 0      Multiplicity: 1

Negative Frequency: None

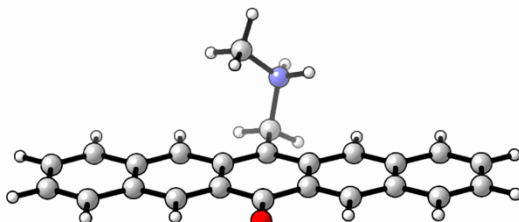

|   |             |             |             |
|---|-------------|-------------|-------------|
| C | 3.73633200  | 0.32888600  | -0.24584400 |
| C | 2.52000900  | 1.00746600  | -0.40900100 |
| C | 1.25792600  | 0.37346700  | -0.29113700 |
| C | 1.27763700  | -1.04665600 | 0.01504500  |
| C | 2.48596800  | -1.72132100 | 0.17981400  |
| C | 3.72989700  | -1.08084500 | 0.06251100  |
| H | 2.58538800  | 2.06365700  | -0.65273600 |
| C | 0.01684100  | 1.06318900  | -0.45077500 |
| C | 0.02957500  | -1.80639900 | 0.15593800  |
| H | 2.44848800  | -2.78268700 | 0.40734700  |
| C | -1.22418000 | -1.06043000 | -0.00648700 |
| C | -1.22092000 | 0.36457400  | -0.29707300 |
| C | 0.04048500  | 2.51908800  | -0.74701500 |
| H | 0.83769800  | 2.81103300  | -1.43402300 |
| H | -0.89311900 | 2.90686000  | -1.15070900 |
| H | 1.19835800  | 3.06829800  | 0.92484000  |
| H | 0.43835100  | 4.35432900  | 0.25206000  |
| C | -0.75625100 | 3.28373200  | 1.57173700  |
| H | -1.67784400 | 3.69592900  | 1.16302300  |
| H | -0.89184000 | 2.23410300  | 1.82662000  |
| H | -0.43979400 | 3.85405200  | 2.44443300  |
| N | 0.30770500  | 3.37521800  | 0.52377500  |
| O | 0.03505300  | -3.03918200 | 0.40934700  |
| C | 5.00462100  | 0.98530700  | -0.37202700 |
| H | 5.02280900  | 2.04708400  | -0.60559300 |
| C | 6.17892500  | 0.29140200  | -0.20175600 |
| H | 7.13048400  | 0.80649700  | -0.30118300 |
| C | 6.16798000  | -1.10336500 | 0.10541700  |
| H | 7.10732000  | -1.63219400 | 0.23606600  |
| C | 4.97013400  | -1.76752900 | 0.23287300  |
| H | 4.94852600  | -2.82959400 | 0.46535500  |
| C | -2.49120600 | 0.98122700  | -0.40909800 |
| H | -2.56653300 | 2.04409100  | -0.61152500 |
| C | -3.69797300 | 0.28388900  | -0.26627600 |
| C | -2.42521700 | -1.75508400 | 0.13597600  |
| H | -2.37383500 | -2.81807400 | 0.35268900  |
| C | -3.67620300 | -1.13175400 | 0.01444600  |
| C | -4.97425500 | 0.92759200  | -0.38518500 |
| H | -5.00391500 | 1.99382600  | -0.59627700 |

|   |             |             |             |
|---|-------------|-------------|-------------|
| C | -4.90922500 | -1.83723500 | 0.16177000  |
| H | -4.87599500 | -2.90345500 | 0.37313000  |
| C | -6.11413700 | -1.18532400 | 0.04016700  |
| H | -7.04773700 | -1.72818600 | 0.15353700  |
| C | -6.14061700 | 0.21611700  | -0.23693100 |
| H | -7.09802000 | 0.72139200  | -0.33078700 |

TS1

Charge: 0 Multiplicity: 1

Negative Frequency: -358.30

|   |             |             |             |
|---|-------------|-------------|-------------|
| C | -3.70438400 | 0.30120100  | -0.21600700 |
| C | -2.49110400 | 0.98452200  | -0.41533400 |
| C | -1.23988700 | 0.34649200  | -0.37719200 |
| C | -1.24185100 | -1.06999900 | -0.09122300 |
| C | -2.43749800 | -1.75648300 | 0.10415500  |
| C | -3.68630700 | -1.11430300 | 0.04788000  |
| H | -2.55451800 | 2.05291200  | -0.59306500 |
| C | 0.01295100  | 1.04156400  | -0.61609000 |
| C | 0.01851100  | -1.82873300 | 0.01192700  |
| H | -2.38922200 | -2.82111100 | 0.31218800  |
| C | 1.27599800  | -1.06501600 | -0.08673200 |
| C | 1.26576000  | 0.35035200  | -0.37505900 |
| C | 0.01750900  | 2.38832100  | -1.04047100 |
| H | 0.89682800  | 2.76961700  | -1.54831300 |
| H | -0.89888900 | 2.80134200  | -1.44565000 |
| O | 0.02111900  | -3.06461000 | 0.19835900  |
| C | -4.91845200 | -1.80558600 | 0.25071000  |
| H | -4.89026100 | -2.87428100 | 0.44828200  |
| C | -6.11821500 | -1.13397900 | 0.19816300  |
| H | -7.05231800 | -1.66559000 | 0.35274800  |
| C | -6.13962900 | 0.26883800  | -0.05909300 |
| H | -7.09293500 | 0.78850300  | -0.09691500 |
| C | -4.97055000 | 0.96606000  | -0.25893200 |
| H | -4.99411000 | 2.03506000  | -0.45497500 |
| C | 2.51091400  | 1.00035200  | -0.40172000 |
| H | 2.56619500  | 2.06919300  | -0.57963900 |
| C | 2.47504000  | -1.74201500 | 0.11615500  |
| H | 2.43422500  | -2.80674900 | 0.32537500  |
| C | 3.72907400  | 0.32615200  | -0.19617900 |
| C | 3.71958300  | -1.08951400 | 0.06658800  |
| C | 4.95540600  | -1.77160100 | 0.27659800  |
| H | 4.93401600  | -2.84052700 | 0.47363200  |
| C | 6.15063500  | -1.09109000 | 0.23133800  |
| H | 7.08763300  | -1.61597800 | 0.39122900  |
| C | 6.16330100  | 0.31162200  | -0.02517300 |
| H | 7.11290300  | 0.83837300  | -0.05732500 |
| C | 4.99007400  | 1.00037400  | -0.23132700 |
| H | 5.00687400  | 2.06960300  | -0.42677900 |
| H | 1.13515700  | 3.84060800  | 0.55640300  |
| H | -0.32204700 | 4.48773200  | 0.16517300  |
| C | -0.41816100 | 3.06224400  | 1.67997500  |

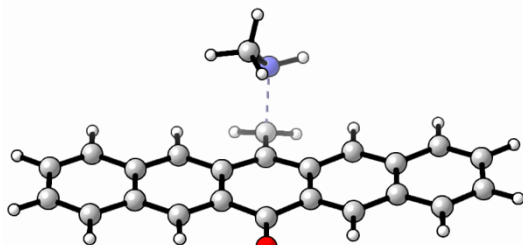

|   |             |            |            |
|---|-------------|------------|------------|
| H | -0.14115900 | 3.65977000 | 2.55240800 |
| H | -1.50389200 | 3.02030600 | 1.59086500 |
| H | -0.03858600 | 2.04429000 | 1.79761200 |
| N | 0.14612100  | 3.62645300 | 0.44173300 |

Int2

Charge: 0 Multiplicity: 1

Negative Frequency: None

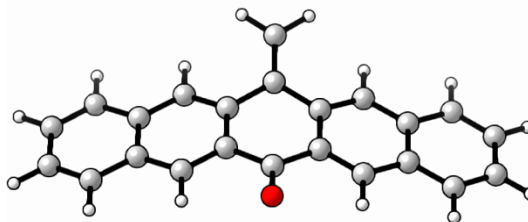

|   |             |             |             |
|---|-------------|-------------|-------------|
| C | 3.67450800  | 0.70012600  | -0.17889100 |
| C | 2.45686000  | 1.40414600  | -0.00273700 |
| C | 1.26348800  | 0.75065500  | 0.25844800  |
| C | 1.26559800  | -0.68261800 | 0.31295000  |
| C | 2.44721500  | -1.38973400 | 0.15780300  |
| C | 3.67374600  | -0.73253400 | -0.08641500 |
| C | 4.89649800  | -1.44227600 | -0.25870100 |
| C | 6.06901900  | -0.76404100 | -0.51187100 |
| C | 6.06996600  | 0.65399200  | -0.60755100 |
| C | 4.90203000  | 1.36924000  | -0.44744700 |
| H | 4.90527200  | 2.45329100  | -0.52044100 |
| H | 7.00119500  | 1.17498300  | -0.80904400 |
| H | 6.99826900  | -1.31034300 | -0.64148600 |
| H | 4.88801300  | -2.52644300 | -0.18776800 |
| H | 2.41810100  | -2.47365400 | 0.21119100  |
| C | 0.00000000  | -1.43851200 | 0.49387100  |
| O | 0.00000000  | -2.65464200 | 0.72195500  |
| C | -1.26559800 | -0.68261800 | 0.31295000  |
| C | -2.44721500 | -1.38973400 | 0.15780300  |
| C | -3.67374600 | -0.73253400 | -0.08641500 |
| C | -4.89649800 | -1.44227600 | -0.25870200 |
| C | -6.06901900 | -0.76404100 | -0.51187200 |
| C | -6.06996700 | 0.65399200  | -0.60755100 |
| C | -4.90203100 | 1.36924000  | -0.44744600 |
| C | -3.67450800 | 0.70012600  | -0.17889000 |
| C | -2.45686000 | 1.40414600  | -0.00273600 |
| C | -1.26348800 | 0.75065600  | 0.25844800  |
| C | 0.00000000  | 1.48711300  | 0.51141600  |
| C | 0.00000100  | 2.73636600  | 1.02251900  |
| H | -0.92126000 | 3.25827200  | 1.25477900  |
| H | 0.92126200  | 3.25827100  | 1.25477800  |
| H | -2.47620200 | 2.48581300  | -0.09199900 |
| H | -4.90527300 | 2.45329200  | -0.52043900 |
| H | -7.00119500 | 1.17498400  | -0.80904300 |
| H | -6.99826900 | -1.31034300 | -0.64148700 |
| H | -4.88801300 | -2.52644300 | -0.18777000 |
| H | -2.41810100 | -2.47365400 | 0.21119000  |
| H | 2.47620100  | 2.48581300  | -0.09200100 |



## 8-Hydroxyquinoline

Int1

Charge: 0 Multiplicity: 1

Negative Frequency: None

|   |             |             |             |
|---|-------------|-------------|-------------|
| C | -0.88902200 | 2.70905100  | -0.14494800 |
| C | -0.19985400 | 0.37953700  | -0.25190800 |
| C | -1.56834900 | 0.03560500  | 0.03523900  |
| C | -2.19889600 | 2.26346700  | 0.13421300  |
| H | -0.67344100 | 3.77107900  | -0.20807600 |
| C | 0.77711800  | -0.65124300 | -0.44005100 |
| C | -1.99306800 | -1.38076100 | 0.14117500  |
| H | -2.99879400 | 2.98529900  | 0.29082900  |
| C | -0.96107900 | -2.34181000 | -0.06934500 |
| C | 0.35714700  | -1.98003700 | -0.34288900 |
| H | -1.23526800 | -3.39185900 | -0.01143800 |
| H | 1.09215900  | -2.77015600 | -0.49185400 |
| C | 2.21374500  | -0.34659700 | -0.69370100 |
| H | 2.73593600  | -1.19372500 | -1.14142100 |
| H | 2.38823900  | 0.53177500  | -1.31824000 |
| H | 2.50168300  | 0.70489600  | 1.10898800  |
| H | 2.86831000  | -0.87743300 | 1.22604600  |
| C | 4.42435500  | 0.26585300  | 0.44179200  |
| H | 4.50434900  | 1.16310000  | -0.17077500 |
| H | 4.86998300  | 0.43479800  | 1.42154500  |
| H | 4.90739500  | -0.57521800 | -0.05441600 |
| N | 2.97322700  | -0.06019400 | 0.61801000  |
| O | -3.19684500 | -1.70779000 | 0.40010400  |
| C | 0.10029800  | 1.76782900  | -0.33508300 |
| H | 1.10920000  | 2.10220800  | -0.55808100 |
| N | -2.52599400 | 0.98193500  | 0.21900300  |

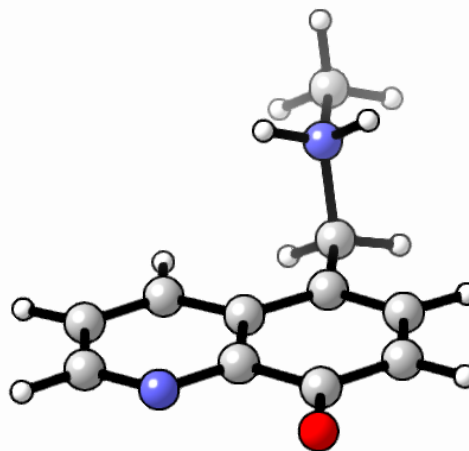

TS1

Charge: 0 Multiplicity: 1

Negative Frequency: -169.80

|   |             |             |             |
|---|-------------|-------------|-------------|
| C | 1.31800000  | -2.61440400 | -0.06916000 |
| C | 0.22302100  | -0.48494000 | -0.43407700 |
| C | 1.42320000  | 0.12938700  | 0.02224800  |
| C | 2.45946700  | -1.90639700 | 0.34897800  |
| H | 1.32062700  | -3.69950500 | -0.08078000 |
| C | -0.91616600 | 0.33465500  | -0.83584100 |
| C | 1.52945100  | 1.61712600  | 0.12083700  |
| H | 3.35451900  | -2.44267000 | 0.65752600  |
| C | 0.35459000  | 2.36610600  | -0.26490300 |
| C | -0.78830600 | 1.75388100  | -0.70178700 |
| H | 0.41631200  | 3.44790100  | -0.19360500 |
| H | -1.64538700 | 2.36439200  | -0.97784600 |
| C | -2.11618500 | -0.19980500 | -1.28203300 |
| H | -2.88416500 | 0.46922000  | -1.65252700 |
| H | -2.20414000 | -1.22781300 | -1.60693400 |
| O | 2.57286200  | 2.18140300  | 0.52115900  |
| N | 2.51267900  | -0.58015800 | 0.39724600  |
| C | 0.20087700  | -1.89854200 | -0.45790600 |
| H | -0.68910600 | -2.42984800 | -0.77670900 |
| H | -4.35021200 | -0.61215300 | 0.19751500  |
| H | -3.19347900 | -1.66663700 | 0.71174700  |
| C | -3.01382600 | 0.21763400  | 1.55562900  |
| H | -3.28169100 | 1.23735300  | 1.26881800  |
| H | -3.50978400 | -0.02829300 | 2.50181100  |
| H | -1.93084800 | 0.18100600  | 1.70373200  |
| N | -3.37414900 | -0.69589700 | 0.46933500  |

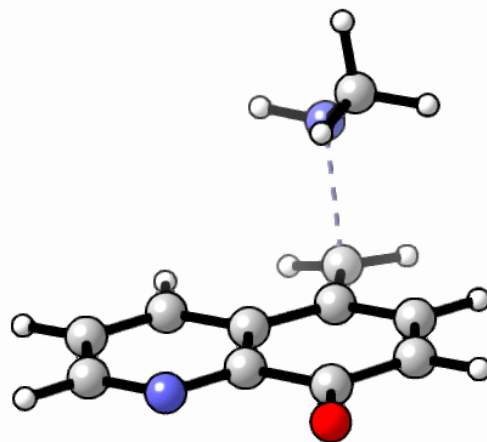

Int2

Charge: 0 Multiplicity: 1

Negative Frequency: None

|   |             |             |             |
|---|-------------|-------------|-------------|
| C | -2.60891400 | 0.86872300  | -0.00003300 |
| C | -1.37518800 | 1.49980500  | -0.00004300 |
| C | -0.19742900 | 0.72889200  | -0.00000700 |
| C | -0.35038700 | -0.67696100 | 0.00001600  |
| N | -1.55048600 | -1.28968500 | 0.00003000  |
| C | -2.64615200 | -0.53403800 | 0.00001100  |
| H | -3.59883500 | -1.05838800 | 0.00002900  |
| C | 0.85232300  | -1.57660100 | 0.00001400  |
| O | 0.74825800  | -2.80917900 | 0.00002300  |
| C | 2.16214100  | -0.92548800 | -0.00003900 |
| C | 2.29376100  | 0.42001800  | -0.00004800 |
| C | 1.15513000  | 1.33050300  | -0.00000100 |
| C | 1.38483900  | 2.66483300  | 0.00007200  |
| H | 0.59227400  | 3.40364600  | 0.00013700  |
| H | 2.40039400  | 3.04722800  | 0.00007200  |
| H | 3.28467000  | 0.86631300  | -0.00007800 |
| H | 3.02804900  | -1.57986300 | -0.00006400 |
| H | -1.32981200 | 2.58278900  | -0.00008500 |
| H | -3.53015300 | 1.44137400  | -0.00006200 |

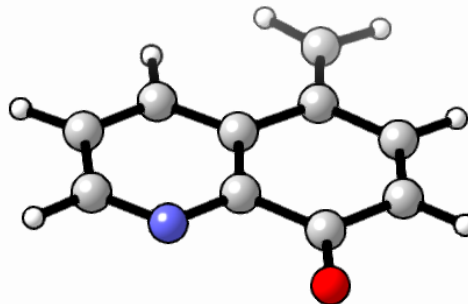

## 5-Hydroxyquinoline

Int1

Charge: 0 Multiplicity: 1

Negative Frequency: None

|   |             |             |             |
|---|-------------|-------------|-------------|
| C | 0.18682000  | 2.60644000  | -0.21625500 |
| C | 0.02512300  | 0.28352900  | -0.29802200 |
| C | 1.41775400  | 0.14275700  | 0.01188500  |
| C | 2.16914600  | 1.31810800  | 0.18324300  |
| C | 1.56561600  | 2.56146600  | 0.06433700  |
| H | -0.32621400 | 3.56300700  | -0.29337900 |
| C | -0.79088300 | -0.86743700 | -0.48429100 |
| C | 2.04131800  | -1.18591600 | 0.15252300  |
| H | 3.22605900  | 1.22357100  | 0.41329400  |
| H | 2.12479100  | 3.48185300  | 0.19479700  |
| C | 1.15709700  | -2.29022200 | -0.01776700 |
| C | -0.19748600 | -2.11976700 | -0.32066700 |
| H | 1.56681500  | -3.29063400 | 0.09240800  |
| H | -0.81630200 | -3.00685300 | -0.44666600 |
| C | -2.22135700 | -0.71947000 | -0.90686200 |
| H | -2.31972700 | -0.28700800 | -1.90843500 |
| H | -2.75699200 | -1.67046800 | -0.88231500 |
| H | -2.37075400 | 1.11651600  | -0.05505800 |
| H | -3.87949500 | 0.46891900  | -0.40568100 |
| C | -3.11833300 | -0.18585000 | 1.41323800  |
| H | -3.61224700 | 0.60717500  | 1.97427500  |
| H | -3.71595000 | -1.09734300 | 1.43693900  |
| H | -2.12707400 | -0.37744200 | 1.82209800  |
| N | -2.96430500 | 0.25569500  | -0.00324800 |
| O | 3.28544000  | -1.30637300 | 0.41666400  |
| N | -0.56217000 | 1.52400000  | -0.39157400 |

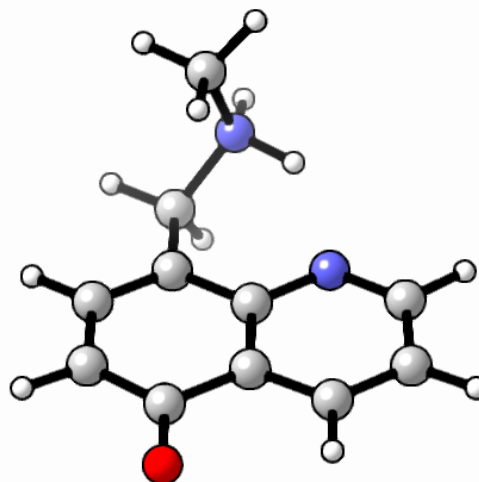

TS1

Charge: 0 Multiplicity: 1

Negative Frequency: -133.08

|   |             |             |             |
|---|-------------|-------------|-------------|
| C | -1.09844000 | 2.59232100  | -0.15005100 |
| C | -0.21772900 | 0.47835800  | -0.44877700 |
| C | -1.41291000 | -0.12120300 | 0.02893400  |
| C | -2.47116600 | 0.71680800  | 0.41771500  |
| C | -2.32119500 | 2.09174000  | 0.33000300  |
| H | -0.94501300 | 3.66688000  | -0.22918100 |
| C | 0.90017100  | -0.36607100 | -0.86207200 |
| C | -1.55204600 | -1.59504600 | 0.13004600  |
| H | -3.38805800 | 0.26535600  | 0.78267000  |
| H | -3.11435700 | 2.77177700  | 0.62193900  |
| C | -0.40273000 | -2.37739100 | -0.27220900 |
| C | 0.74314100  | -1.78591100 | -0.72741400 |
| H | -0.48594200 | -3.45728700 | -0.19720400 |
| H | 1.58543300  | -2.41132500 | -1.01510200 |
| C | 2.08938600  | 0.16921700  | -1.31501200 |
| H | 2.86619400  | -0.48375300 | -1.69463000 |
| H | 2.16005000  | 1.21878800  | -1.56347600 |
| H | 4.37286100  | 0.43047600  | 0.28313200  |
| H | 3.29953500  | 1.60993400  | 0.69903700  |
| C | 2.90816800  | -0.21056700 | 1.60778700  |
| H | 3.39978900  | 0.00529600  | 2.56453300  |
| H | 1.83233900  | -0.04858900 | 1.72129200  |
| H | 3.06366800  | -1.26393800 | 1.36094100  |
| N | 3.39915100  | 0.61731400  | 0.50580900  |
| O | -2.61088900 | -2.11996000 | 0.54791000  |
| N | -0.07733600 | 1.82590500  | -0.52737200 |

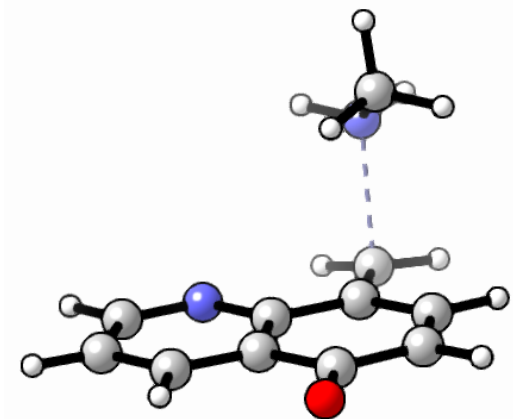

Int2

Charge: 0 Multiplicity: 1

Negative Frequency: None

|   |             |             |             |
|---|-------------|-------------|-------------|
| C | 2.52864100  | 0.87850000  | 0.00009200  |
| N | 1.33626100  | 1.47729200  | 0.00005400  |
| C | 0.23238700  | 0.70284000  | -0.00003400 |
| C | 0.30482300  | -0.70697000 | -0.00009600 |
| C | 1.56969500  | -1.31417600 | -0.00004400 |
| C | 2.70243300  | -0.51399800 | 0.00004400  |
| H | 3.69945100  | -0.94072600 | 0.00007200  |
| H | 1.63493100  | -2.39701300 | -0.00009800 |
| C | -0.92634500 | -1.54279000 | -0.00027000 |
| O | -0.86528900 | -2.78209300 | 0.00009800  |
| C | -2.20671900 | -0.83613400 | -0.00000600 |
| C | -2.27137300 | 0.51584100  | 0.00004300  |
| C | -1.09038400 | 1.36957900  | -0.00001500 |
| C | -1.22055600 | 2.71605600  | 0.00001900  |
| H | -0.35159900 | 3.36339800  | 0.00000400  |
| H | -2.20232600 | 3.17871700  | 0.00005300  |
| H | -3.23915000 | 1.01037700  | 0.00015100  |
| H | -3.10289600 | -1.44813500 | 0.00009500  |
| H | 3.39446300  | 1.53659200  | 0.00016500  |

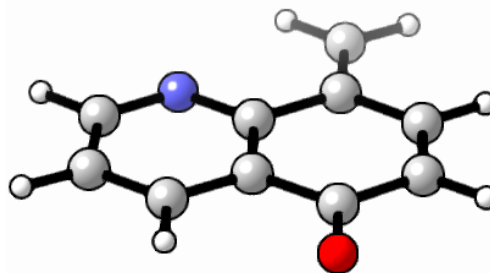

## Calculated Coordinates – Benzylammoniums (Benzylammoniums (Secondary and Tertiary Amine))

### 1,4-Naphthalene (Secondary Amine)

Int1

Charge: 0      Multiplicity: 1  
Negative Frequency: None

|   |             |             |             |
|---|-------------|-------------|-------------|
| C | -1.14094300 | 2.74689300  | -0.06782800 |
| C | -0.16927700 | 1.80927800  | -0.36987100 |
| C | -0.44024900 | 0.40896800  | -0.33192100 |
| C | -1.77089500 | -0.00019200 | 0.02233000  |
| C | -2.73998400 | 0.98283000  | 0.32642600  |
| C | -2.44339000 | 2.33510400  | 0.29054900  |
| H | -0.89780400 | 3.80514500  | -0.11095700 |
| H | 0.81454000  | 2.16719200  | -0.66088900 |
| C | 0.55068800  | -0.58774000 | -0.62604700 |
| C | -2.15133400 | -1.42542000 | 0.07140600  |
| H | -3.73509500 | 0.63936300  | 0.59130000  |
| H | -3.20300000 | 3.07367900  | 0.53028400  |
| C | -1.11814500 | -2.35040900 | -0.24975500 |
| C | 0.17375300  | -1.93137600 | -0.57377600 |
| H | -1.35952600 | -3.41007200 | -0.23166700 |
| H | 0.92385000  | -2.68948500 | -0.79586100 |
| C | 1.95989800  | -0.22101700 | -0.93343000 |
| H | 2.51967400  | -1.05798800 | -1.35533200 |
| H | 2.05792600  | 0.63240600  | -1.60867800 |
| H | 2.21326600  | 0.93759000  | 0.78235700  |
| C | 4.09848100  | 0.76617800  | -0.02293200 |
| H | 4.59684700  | 1.09793900  | 0.88775000  |
| H | 4.68543600  | -0.01260300 | -0.51068700 |
| H | 3.95567000  | 1.60822600  | -0.69968600 |
| N | 2.75904500  | 0.19658000  | 0.33277300  |
| O | -3.33931700 | -1.78480800 | 0.38282600  |
| C | 2.87699000  | -0.92279700 | 1.32209900  |
| H | 1.87756500  | -1.27776700 | 1.56643600  |
| H | 3.45983300  | -1.72336600 | 0.86542200  |
| H | 3.37848100  | -0.54964500 | 2.21468500  |

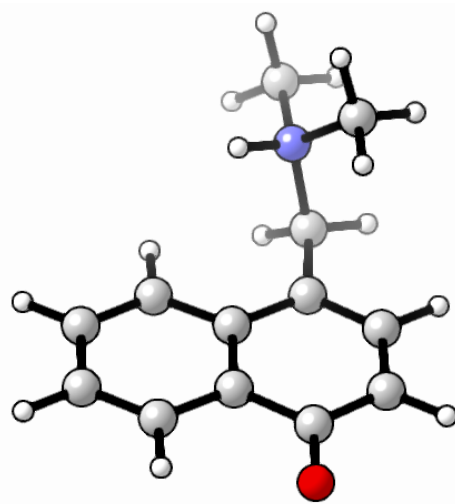

TS1

Charge: 0 Multiplicity: 1

Negative Frequency: -101.71

|   |             |             |             |
|---|-------------|-------------|-------------|
| C | -1.50757300 | 2.69295600  | -0.09605400 |
| C | -0.45708900 | 1.87235800  | -0.48326500 |
| C | -0.57243600 | 0.46276600  | -0.44554600 |
| C | -1.79695200 | -0.09282700 | 0.02026600  |
| C | -2.85305100 | 0.75654000  | 0.40758100  |
| C | -2.71956100 | 2.13590100  | 0.35172300  |
| H | -1.38800000 | 3.77186400  | -0.13702500 |
| H | 0.46735600  | 2.33181200  | -0.81587300 |
| C | 0.51844000  | -0.42812800 | -0.84777300 |
| C | -1.98494300 | -1.56187100 | 0.12100600  |
| H | -3.77370400 | 0.29961700  | 0.75529600  |
| H | -3.53917800 | 2.78066400  | 0.65448300  |
| C | -0.85834400 | -2.38701500 | -0.25549400 |
| C | 0.31342500  | -1.84037700 | -0.69950400 |
| H | -0.98133000 | -3.46291300 | -0.17479900 |
| H | 1.13607400  | -2.49766700 | -0.97337800 |
| C | 1.74326200  | 0.02410600  | -1.30196800 |
| H | 2.47912300  | -0.69284900 | -1.64876700 |
| H | 1.90416600  | 1.04570500  | -1.61943800 |
| H | 2.88127500  | 1.44499900  | 0.69715000  |
| C | 2.63846300  | -0.40486900 | 1.54876600  |
| H | 3.19696800  | -0.24338200 | 2.48160800  |
| H | 1.57443800  | -0.23772500 | 1.73466600  |
| H | 2.77043500  | -1.44565300 | 1.23710000  |
| N | 3.08387600  | 0.47422700  | 0.47293700  |
| O | -3.06706300 | -2.05850700 | 0.52010900  |
| C | 4.48412900  | 0.31366200  | 0.08406000  |
| H | 5.17773100  | 0.50402600  | 0.91613900  |
| H | 4.64178200  | -0.71084200 | -0.26791500 |
| H | 4.71560800  | 1.00160000  | -0.73346700 |

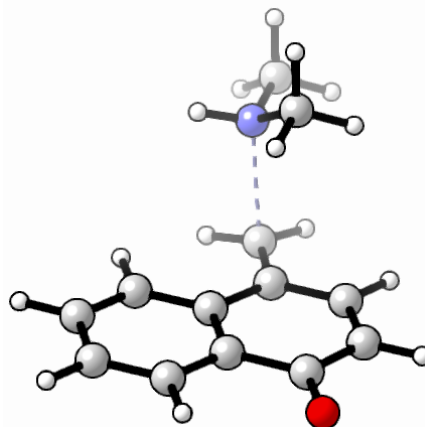



Int2

Charge: 0 Multiplicity: 1

Negative Frequency: None

|   |             |             |             |
|---|-------------|-------------|-------------|
| C | 2.61095500  | 0.93255000  | -0.00018600 |
| C | 1.34823700  | 1.51755100  | -0.00022400 |
| C | 0.18201400  | 0.72926200  | -0.00004100 |
| C | 0.32777000  | -0.68026100 | 0.00008300  |
| C | 1.60834500  | -1.25980600 | 0.00013200  |
| C | 2.74691600  | -0.46372300 | 0.00001600  |
| H | 3.73303400  | -0.91751500 | 0.00005300  |
| H | 1.68403100  | -2.34190600 | 0.00024100  |
| C | -0.86150600 | -1.57486100 | 0.00005700  |
| O | -0.74936800 | -2.81177100 | 0.00025800  |
| C | -2.17798800 | -0.93698700 | -0.00029700 |
| C | -2.31294200 | 0.40787600  | -0.00033800 |
| C | -1.17621300 | 1.32368300  | -0.00000600 |
| C | -1.42284400 | 2.65547200  | 0.00047600  |
| H | -0.63932200 | 3.40385000  | 0.00093000  |
| H | -2.44314500 | 3.02543700  | 0.00046600  |
| H | -3.30536000 | 0.85130200  | -0.00054100 |
| H | -3.04058100 | -1.59584500 | -0.00046900 |
| H | 1.27633500  | 2.59924700  | -0.00043800 |
| H | 3.49348700  | 1.56506000  | -0.00033800 |

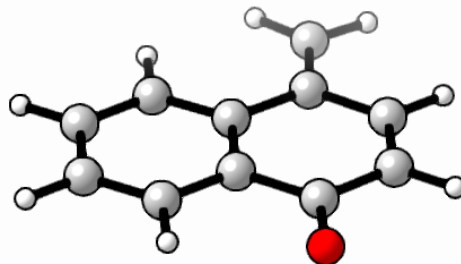

Dimethylamine

Charge: 0 Multiplicity: 1

Negative Frequency: None

|   |             |             |             |
|---|-------------|-------------|-------------|
| H | -0.00000100 | 1.32742000  | 0.52598600  |
| N | 0.00000000  | 0.57066300  | -0.15367800 |
| C | -1.21724500 | -0.22491400 | 0.02020300  |
| H | -2.09653600 | 0.42176000  | -0.05665800 |
| H | -1.26039100 | -0.75818500 | 0.98689100  |
| H | -1.27783300 | -0.97512000 | -0.77657000 |
| C | 1.21724500  | -0.22491400 | 0.02020300  |
| H | 1.26040500  | -0.75816100 | 0.98690400  |
| H | 1.27781600  | -0.97514100 | -0.77655100 |
| H | 2.09653700  | 0.42175400  | -0.05669200 |

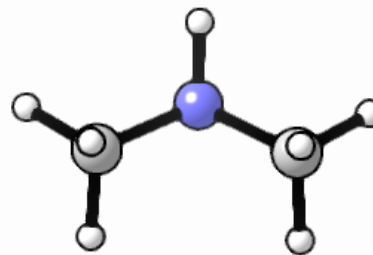

## 1,4-Naphthalene (Tertiary Amine)

Int1

Charge: 0 Multiplicity: 1

Negative Frequency: None

|   |             |             |             |
|---|-------------|-------------|-------------|
| C | 1.61555900  | 2.68581300  | -0.19179500 |
| C | 0.56261000  | 1.83070400  | -0.46011300 |
| C | 0.69578200  | 0.41406000  | -0.36031700 |
| C | 1.98442900  | -0.09899400 | 0.01749000  |
| C | 3.03959700  | 0.80208800  | 0.29255200  |
| C | 2.87250200  | 2.17252200  | 0.19753400  |
| H | 1.47111800  | 3.75898500  | -0.28420700 |
| H | -0.38392600 | 2.26433200  | -0.76356900 |
| C | -0.37805800 | -0.50418400 | -0.63664400 |
| C | 2.24282400  | -1.54852600 | 0.11415900  |
| H | 3.99700600  | 0.37841300  | 0.57901500  |
| H | 3.69654300  | 2.84686400  | 0.41263400  |
| C | 1.14735600  | -2.39233700 | -0.22484200 |
| C | -0.09599700 | -1.87419400 | -0.58297700 |
| H | 1.30393100  | -3.46760400 | -0.19903100 |
| H | -0.89054400 | -2.57578000 | -0.83298200 |
| C | -1.75025200 | -0.06307300 | -1.00593700 |
| H | -1.78124700 | 0.91281600  | -1.49201500 |
| H | -2.24070500 | -0.78470800 | -1.66259100 |
| C | -4.07763100 | 0.56442400  | -0.36199700 |
| H | -4.44224600 | -0.16256100 | -1.08764300 |
| H | -4.79422300 | 0.66842100  | 0.45296900  |
| H | -3.92303200 | 1.52876900  | -0.84575400 |
| N | -2.76726400 | 0.08172600  | 0.19474200  |
| O | 3.38647900  | -1.99958400 | 0.46637600  |
| C | -2.26039300 | 1.06645100  | 1.20938100  |
| H | -1.28846100 | 0.73067500  | 1.56633800  |
| H | -2.16878000 | 2.04442500  | 0.74010700  |
| H | -2.97116200 | 1.11527900  | 2.03455300  |
| C | -2.97200500 | -1.24779600 | 0.86433600  |
| H | -3.32871500 | -1.96538300 | 0.12568000  |
| H | -2.02338100 | -1.58111200 | 1.28059400  |
| H | -3.71109800 | -1.12899100 | 1.65670500  |

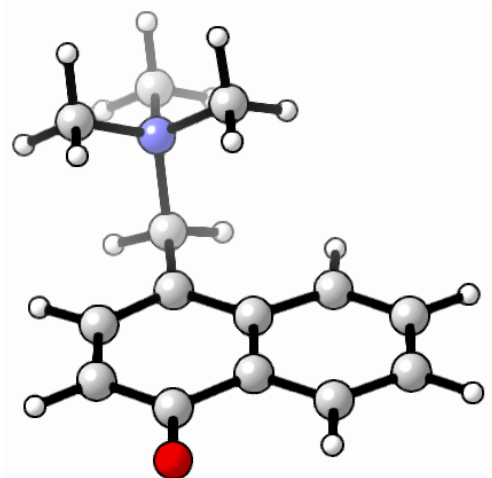

TS1

Charge: 0 Multiplicity: 1

Negative Frequency: -67.56

|   |             |             |             |
|---|-------------|-------------|-------------|
| C | 1.63641600  | 2.69027700  | 0.23721000  |
| C | 0.63248700  | 1.81487400  | 0.62545700  |
| C | 0.78672300  | 0.41433900  | 0.49968300  |
| C | 2.00940200  | -0.07324100 | -0.03979900 |
| C | 3.01806300  | 0.83127600  | -0.43037800 |
| C | 2.84223600  | 2.20006500  | -0.29766600 |
| H | 1.48576200  | 3.76044400  | 0.34669600  |
| H | -0.28670200 | 2.22502700  | 1.02850600  |
| C | -0.25531300 | -0.53661400 | 0.90391800  |
| C | 2.25181900  | -1.52833500 | -0.20469200 |
| H | 3.93747700  | 0.42472000  | -0.83842200 |
| H | 3.62537100  | 2.88780100  | -0.60230900 |
| C | 1.18898800  | -2.41581900 | 0.21580700  |
| C | 0.01731300  | -1.93645600 | 0.72887700  |
| H | 1.35977800  | -3.48256000 | 0.10623200  |
| H | -0.75746100 | -2.63831400 | 1.02967700  |
| C | -1.48938100 | -0.15860100 | 1.39378100  |
| H | -2.16569200 | -0.91171800 | 1.78143000  |
| H | -1.71366200 | 0.86066200  | 1.67961800  |
| O | 3.32703800  | -1.96405900 | -0.68339100 |
| C | -3.10314000 | -1.22967000 | -0.90499500 |
| H | -3.73426500 | -1.22879700 | -1.80760900 |
| H | -2.11408800 | -1.61577300 | -1.16857000 |
| H | -3.55172500 | -1.89567600 | -0.16312700 |
| N | -2.96131000 | 0.11137500  | -0.34284100 |
| C | -4.20868200 | 0.63524200  | 0.21098600  |
| H | -4.97816000 | 0.77073500  | -0.56581700 |
| H | -4.59254800 | -0.05750900 | 0.96521700  |
| H | -4.01966900 | 1.60147100  | 0.68708500  |
| C | -2.31813700 | 1.03075600  | -1.28066400 |
| H | -2.20758800 | 2.01357600  | -0.81667600 |
| H | -1.32415700 | 0.65071400  | -1.53185600 |
| H | -2.90256300 | 1.13949900  | -2.20820200 |

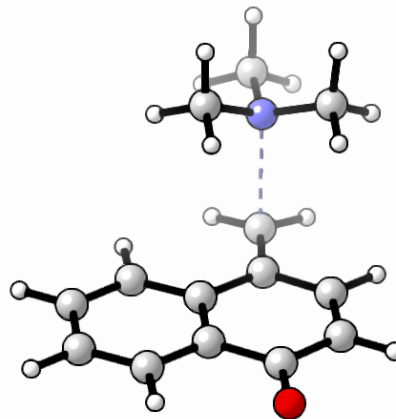

Int2

Charge: 0 Multiplicity: 1

Negative Frequency: None

|   |             |             |             |
|---|-------------|-------------|-------------|
| C | 2.61095500  | 0.93255000  | -0.00018600 |
| C | 1.34823700  | 1.51755100  | -0.00022400 |
| C | 0.18201400  | 0.72926200  | -0.00004100 |
| C | 0.32777000  | -0.68026100 | 0.00008300  |
| C | 1.60834500  | -1.25980600 | 0.00013200  |
| C | 2.74691600  | -0.46372300 | 0.00001600  |
| H | 3.73303400  | -0.91751500 | 0.00005300  |
| H | 1.68403100  | -2.34190600 | 0.00024100  |
| C | -0.86150600 | -1.57486100 | 0.00005700  |
| O | -0.74936800 | -2.81177100 | 0.00025800  |
| C | -2.17798800 | -0.93698700 | -0.00029700 |
| C | -2.31294200 | 0.40787600  | -0.00033800 |
| C | -1.17621300 | 1.32368300  | -0.00000600 |
| C | -1.42284400 | 2.65547200  | 0.00047600  |
| H | -0.63932200 | 3.40385000  | 0.00093000  |
| H | -2.44314500 | 3.02543700  | 0.00046600  |
| H | -3.30536000 | 0.85130200  | -0.00054100 |
| H | -3.04058100 | -1.59584500 | -0.00046900 |
| H | 1.27633500  | 2.59924700  | -0.00043800 |
| H | 3.49348700  | 1.56506000  | -0.00033800 |



Trimethylamine

Charge: 0 Multiplicity: 1

Negative Frequency: None

|   |             |             |             |
|---|-------------|-------------|-------------|
| C | 1.30494500  | 0.48189600  | 0.06224000  |
| N | -0.00001800 | 0.00003800  | -0.38598500 |
| C | -1.06982700 | 0.88910400  | 0.06243700  |
| H | -2.03267000 | 0.53557200  | -0.31993900 |
| H | -0.89851100 | 1.90038600  | -0.31992500 |
| H | -1.13832100 | 0.94595700  | 1.16695200  |
| C | -0.23511000 | -1.37101300 | 0.06227800  |
| H | -0.25048700 | -1.45883900 | 1.16679200  |
| H | 0.55268200  | -2.02798800 | -0.31986300 |
| H | -1.19644200 | -1.72832000 | -0.32037700 |
| H | 1.38856200  | 0.51271400  | 1.16676000  |
| H | 1.48029400  | 1.49253400  | -0.32005300 |
| H | 2.09497100  | -0.17220900 | -0.32018300 |

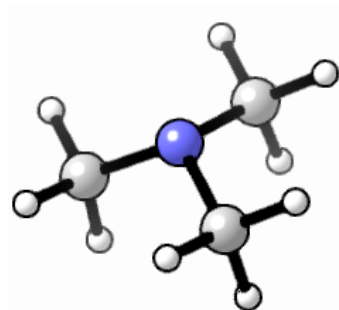

## Calculated Coordinates – Isomerization

### 1,4-Hydroxyanthraldehyde

Hydroxy-aldehyde

Charge: 0    Multiplicity: 1

Negative Frequency: None

|   |             |             |             |
|---|-------------|-------------|-------------|
| C | 3.11305200  | -1.28378800 | 0.00002600  |
| C | 1.84886600  | -1.83785900 | -0.00002000 |
| C | 0.66871100  | -1.00529100 | 0.00000600  |
| C | -0.61831300 | -1.55452200 | -0.00005100 |
| C | -1.76775600 | -0.75079100 | -0.00002400 |
| C | -3.08657900 | -1.30419800 | -0.00008600 |
| C | -4.18763700 | -0.48344000 | -0.00006100 |
| C | -4.03209300 | 0.93549600  | 0.00003000  |
| C | -2.78001400 | 1.50078700  | 0.00009300  |
| C | -1.60858600 | 0.68025300  | 0.00006700  |
| C | -0.31665900 | 1.23360400  | 0.00012600  |
| C | 0.83461100  | 0.43656000  | 0.00009600  |
| C | 2.17802000  | 0.98296000  | 0.00015700  |
| C | 3.26188500  | 0.11325300  | 0.00010000  |
| H | 4.26785300  | 0.52486200  | 0.00013300  |
| C | 2.51192800  | 2.40633300  | 0.00027100  |
| O | 1.73415800  | 3.36306900  | -0.00038800 |
| H | 3.60343300  | 2.60063500  | -0.00048700 |
| H | -0.20683600 | 2.31005500  | 0.00019800  |
| H | -2.66029900 | 2.58065500  | 0.00016300  |
| H | -4.91486700 | 1.56778900  | 0.00005000  |
| H | -5.18579800 | -0.91064400 | -0.00011100 |
| H | -3.20151800 | -2.38470600 | -0.00015300 |
| H | -0.77099300 | -2.63080200 | -0.00012100 |
| O | 1.77925400  | -3.19108700 | -0.00010900 |
| H | 0.86726400  | -3.51222300 | -0.00007700 |
| H | 3.97784300  | -1.93761900 | 0.00000200  |

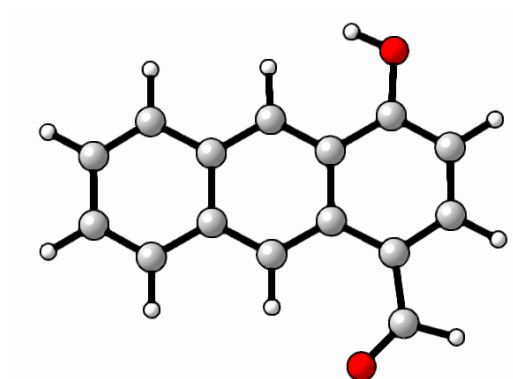

Anthrone-aldehyde

Charge: 0 Multiplicity: 1

Negative Frequency: None

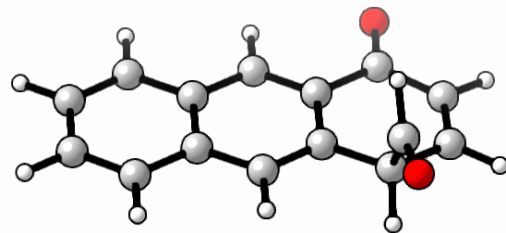

|   |             |             |             |
|---|-------------|-------------|-------------|
| C | 3.05007300  | 1.34526800  | -0.32183400 |
| C | 3.22857200  | 0.03818500  | -0.58025200 |
| C | 2.13017200  | -0.98057300 | -0.47902000 |
| C | 0.74293500  | -0.39378800 | -0.31604300 |
| C | -0.36202900 | -1.21868900 | -0.39927700 |
| C | -1.67629800 | -0.71871600 | -0.20980200 |
| C | -2.82445300 | -1.55419400 | -0.30003100 |
| C | -4.08604900 | -1.03366700 | -0.10404500 |
| C | -4.26155800 | 0.34569500  | 0.18925500  |
| C | -3.17036700 | 1.18163800  | 0.28138400  |
| C | -1.85290100 | 0.67572500  | 0.08562500  |
| C | -0.70976800 | 1.50348400  | 0.16802800  |
| C | 0.56434700  | 0.99445600  | -0.02605600 |
| C | 1.73535700  | 1.91039500  | 0.02671900  |
| O | 1.62206400  | 3.10613900  | 0.32446800  |
| H | -0.82461900 | 2.56180200  | 0.38149600  |
| H | -3.29887400 | 2.23723300  | 0.50386500  |
| H | -5.26268300 | 0.73777600  | 0.33996200  |
| H | -4.95595100 | -1.67976900 | -0.17373900 |
| H | -2.69146900 | -2.60883600 | -0.52437200 |
| H | -0.23161600 | -2.27578200 | -0.61767300 |
| C | 2.42969200  | -1.84266500 | 0.76046900  |
| O | 2.76065200  | -3.00949400 | 0.70810600  |
| H | 2.31735900  | -1.31525300 | 1.72751700  |
| H | 2.16945600  | -1.65482300 | -1.34169900 |
| H | 4.21525900  | -0.34026800 | -0.83453300 |
| H | 3.87506000  | 2.04944400  | -0.37214700 |

Anthrone-enol

Charge: 0 Multiplicity: 1

Negative Frequency: None

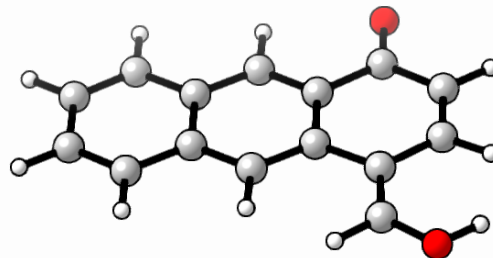

|   |             |             |             |
|---|-------------|-------------|-------------|
| C | 2.87198700  | 1.59598000  | -0.00015400 |
| C | 3.15959400  | 0.26935200  | -0.00016900 |
| C | 2.15178400  | -0.76531800 | -0.00002600 |
| C | 2.50564700  | -2.08792600 | 0.00000100  |
| O | 3.73928900  | -2.61436400 | -0.00000100 |
| H | 4.43876100  | -1.94262300 | 0.00033000  |
| H | 1.76843100  | -2.88132800 | -0.00002000 |
| C | 0.73090500  | -0.34874500 | 0.00004000  |
| C | -0.33138400 | -1.24688000 | 0.00010100  |
| C | -1.67957500 | -0.82264500 | 0.00005800  |
| C | -2.76326900 | -1.75009100 | 0.00007300  |
| C | -4.06666800 | -1.30527700 | -0.00000600 |
| C | -4.35743100 | 0.08804500  | -0.00010000 |
| C | -3.33489000 | 1.00980200  | -0.00010500 |
| C | -1.97440900 | 0.58262500  | -0.00002300 |
| C | -0.89584800 | 1.48939400  | -0.00001000 |
| C | 0.42305500  | 1.05750900  | 0.00002500  |
| C | 1.50035100  | 2.08258000  | 0.00006400  |
| O | 1.24781900  | 3.30243100  | 0.00022400  |
| H | -1.08902200 | 2.55770800  | -0.00002200 |
| H | -3.54899400 | 2.07517900  | -0.00017100 |
| H | -5.39148500 | 0.41917900  | -0.00017000 |
| H | -4.88360600 | -2.02081100 | 0.00000100  |
| H | -2.54443700 | -2.81448100 | 0.00014300  |
| H | -0.15552400 | -2.31721300 | 0.00018100  |
| H | 4.20978500  | -0.01244000 | -0.00036200 |
| H | 3.66013000  | 2.34186500  | -0.00029400 |

## 9,10-Hydroxyanthraldehyde

Hydroxy-aldehyde

Charge: 0    Multiplicity: 1

Negative Frequency: None

|   |             |             |             |
|---|-------------|-------------|-------------|
| C | -3.78670600 | -0.68916500 | -0.02716000 |
| C | -2.63558200 | -1.43367800 | 0.02534000  |
| C | -1.35416800 | -0.80127900 | 0.02464000  |
| C | -0.17957500 | -1.58536700 | 0.04531100  |
| C | 1.10912400  | -1.00227700 | -0.00328200 |
| C | 2.28478400  | -1.81215300 | -0.03689900 |
| C | 3.53709500  | -1.25046300 | -0.06357900 |
| C | 3.66401500  | 0.16122000  | -0.05537400 |
| C | 2.55319000  | 0.97419400  | -0.03073000 |
| C | 1.22645100  | 0.43671900  | -0.01062000 |
| C | 0.05114900  | 1.25580800  | 0.01635500  |
| C | -1.24323200 | 0.63376300  | -0.00778700 |
| C | -2.47612000 | 1.36085200  | -0.09124400 |
| C | -3.69634700 | 0.72561600  | -0.09515300 |
| H | -4.60346700 | 1.31884600  | -0.16228300 |
| H | -2.47151700 | 2.43895200  | -0.17508200 |
| C | 0.11269400  | 2.71233100  | 0.13301400  |
| O | 1.10943100  | 3.44023200  | 0.04192500  |
| H | -0.84817500 | 3.20247000  | 0.35213100  |
| H | 2.67306300  | 2.04674300  | -0.03479200 |
| H | 4.65284600  | 0.60989800  | -0.07423600 |
| H | 4.41991400  | -1.88061300 | -0.09345000 |
| H | 2.21274800  | -2.89593500 | -0.05197200 |
| O | -0.36749800 | -2.92287000 | 0.09793500  |
| H | 0.46771300  | -3.40631400 | 0.15506900  |
| H | -2.68172700 | -2.51541500 | 0.05896400  |
| H | -4.75750900 | -1.17426300 | -0.03020900 |

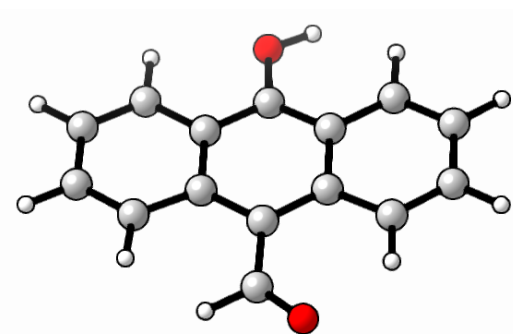



Anthrone-aldehyde

Charge: 0 Multiplicity: 1

Negative Frequency: None

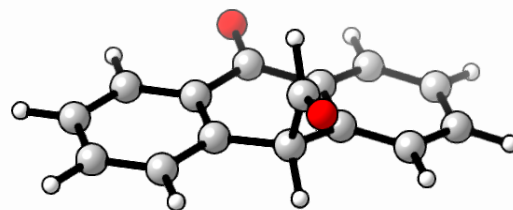

|   |             |             |             |
|---|-------------|-------------|-------------|
| C | -3.68330600 | -0.95674100 | -0.21748600 |
| C | -2.48280600 | -1.58623600 | 0.09274200  |
| C | -1.27145800 | -0.87305100 | 0.04981800  |
| C | -1.27372700 | 0.48806500  | -0.30942900 |
| C | -2.48984400 | 1.11588000  | -0.61363000 |
| C | -3.68538600 | 0.39943900  | -0.57507500 |
| H | -4.61868200 | 0.89536700  | -0.82350100 |
| H | -2.49525900 | 2.16789400  | -0.88456400 |
| C | 0.00000000  | 1.30308800  | -0.29151700 |
| C | 1.27372700  | 0.48806500  | -0.30942900 |
| C | 2.48984400  | 1.11588100  | -0.61363000 |
| C | 3.68538700  | 0.39944100  | -0.57507500 |
| C | 3.68330700  | -0.95673900 | -0.21748500 |
| C | 2.48280800  | -1.58623500 | 0.09274200  |
| C | 1.27145900  | -0.87305100 | 0.04981800  |
| C | 0.00000000  | -1.58654400 | 0.34305900  |
| O | 0.00000000  | -2.74417100 | 0.77430300  |
| H | 2.45716100  | -2.63568000 | 0.36566400  |
| H | 4.61454900  | -1.51350300 | -0.18627700 |
| H | 4.61868200  | 0.89537000  | -0.82350000 |
| H | 2.49525900  | 2.16789500  | -0.88456400 |
| C | 0.00000000  | 2.11054000  | 1.01589500  |
| O | -0.00000400 | 3.32399000  | 1.06367600  |
| H | 0.00000100  | 1.49529900  | 1.93716700  |
| H | 0.00000000  | 2.02717100  | -1.11155600 |
| H | -2.45715900 | -2.63568100 | 0.36566500  |
| H | -4.61454800 | -1.51350500 | -0.18627800 |

Anthrone-enol

Charge: 0 Multiplicity: 1

Negative Frequency: None

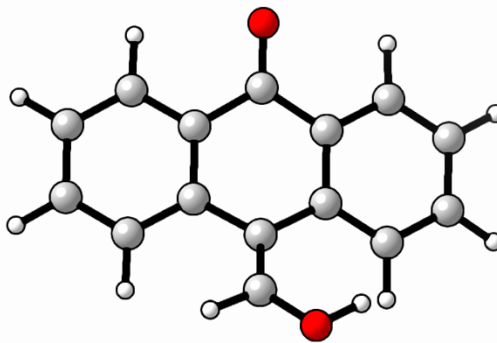

|   |             |             |             |
|---|-------------|-------------|-------------|
| C | -3.48492100 | -1.33284100 | -0.30606500 |
| C | -2.23965400 | -1.85283900 | 0.02948900  |
| C | -1.10807000 | -1.02331000 | 0.09997000  |
| C | -1.22633500 | 0.36821500  | -0.14125700 |
| C | -2.48760800 | 0.86754600  | -0.52982900 |
| C | -3.59987700 | 0.03115700  | -0.60667600 |
| H | -4.55509500 | 0.44184800  | -0.91927200 |
| H | -2.59338500 | 1.90065800  | -0.84663700 |
| C | -0.04412900 | 1.22883000  | 0.02012600  |
| C | -0.10593700 | 2.51480200  | 0.46534600  |
| O | -1.19507300 | 3.23113300  | 0.81330600  |
| H | -1.99971900 | 2.68714600  | 0.80437000  |
| H | 0.79417900  | 3.09275200  | 0.63908600  |
| C | 1.28233000  | 0.59507400  | -0.11657600 |
| C | 2.44645000  | 1.32606700  | -0.43012400 |
| C | 3.68859700  | 0.70274200  | -0.49216600 |
| C | 3.81043400  | -0.67491200 | -0.24773300 |
| C | 2.67253900  | -1.41537400 | 0.04192000  |
| C | 1.40843400  | -0.79895600 | 0.10012700  |
| C | 0.21631300  | -1.63532000 | 0.36851100  |
| O | 0.31893400  | -2.81450100 | 0.73785700  |
| H | 2.73197200  | -2.48395300 | 0.21928800  |
| H | 4.78136400  | -1.15716300 | -0.30088500 |
| H | 4.56696000  | 1.28853400  | -0.74662600 |
| H | 2.37820300  | 2.38541800  | -0.65396200 |
| H | -2.11364600 | -2.91200400 | 0.22735600  |
| H | -4.35311700 | -1.98158400 | -0.36239900 |

## References

- 1 Gaussian 16, Revision A.03, M. J. Frisch, G. W. Trucks, H. B. Schlegel, G. E. Scuseria, M. A. Robb, J. R. Cheeseman, G. Scalmani, V. Barone, G. A. Petersson, H. Nakatsuji, X. Li, M. Caricato, A. V. Marenich, J. Bloino, B. G. Janesko, R. Gomperts, B. Mennucci, H. P. Hratchian, J. V. Ortiz, A. F. Izmaylov, J. L. Sonnenberg, D. Williams-Young, F. Ding, F. Lipparini, F. Egidi, J. Goings, B. Peng, A. Petrone, T. Henderson, D. Ranasinghe, V. G. Zakrzewski, J. Gao, N. Rega, G. Zheng, W. Liang, M. Hada, M. Ehara, K. Toyota, R. Fukuda, J. Hasegawa, M. Ishida, T. Nakajima, Y. Honda, O. Kitao, H. Nakai, T. Vreven, K. Throssell, J. A. Montgomery, Jr., J. E. Peralta, F. Ogliaro, M. J. Bearpark, J. J. Heyd, E. N. Brothers, K. N. Kudin, V. N. Staroverov, T. A. Keith, R. Kobayashi, J. Normand, K. Raghavachari, A. P. Rendell, J. C. Burant, S. S. Iyengar, J. Tomasi, M. Cossi, J. M. Millam, M. Klene, C. Adamo, R. Cammi, J. W. Ochterski, R. L. Martin, K. Morokuma, O. Farkas, J. B. Foresman, and D. J. Fox, Gaussian, Inc., Wallingford CT, 2016., .
- 2 V. Barone and M. Cossi, *J. Phys. Chem. A*, 1998, **102**, 1995–2001.
- 3 A. D. Becke, *J. Chem. Phys.*, 1993, **98**, 5648–5652.
- 4 C. Lee, W. Yang and R. G. Parr, *Phys. Rev. B*, 1988, **37**, 785–789.
- 5 S. Grimme, J. Antony, S. Ehrlich and H. Krieg, *J. Chem. Phys.*, 2010, **132**, 154104.
- 6 S. Grimme, *Chem. – Eur. J.*, 2012, **18**, 9955–9964.
- 7 G. Luchini, J. V. Alegre-Requena, I. Funes-Ardoiz and R. S. Paton, *F1000Research*, 2020, **9**, 291.
- 8 Y. Zhao and D. G. Truhlar, *Theor. Chem. Acc.*, 2008, **120**, 215–241.
- 9 R. A. Kendall, T. H. Dunning and R. J. Harrison, *J. Chem. Phys.*, 1992, **96**, 6796–6806.
- 10 S. Grimme, C. Bannwarth, S. Dohm, A. Hansen, J. Pisarek, P. Pracht, J. Seibert and F. Neese, *Angew. Chem. Int. Ed.*, 2017, **56**, 14763–14769.
- 11 S. Grimme, *J. Chem. Theory Comput.*, 2019, **15**, 2847–2862.
- 12 C. Bannwarth, S. Ehlert and S. Grimme, *J. Chem. Theory Comput.*, 2019, **15**, 1652–1671.
- 13 S. Grimme, C. Bannwarth and P. Shushkov, *J. Chem. Theory Comput.*, 2017, **13**, 1989–2009.
- 14 P. Pracht, E. Caldeweyher, S. Ehlert and S. Grimme, *A Robust Non-Self-Consistent Tight-Binding Quantum Chemistry Method for large Molecules*, Chemistry, 2019.
- 15 CYLview20; Legault, C. Y., Université de Sherbrooke, 2020 (<http://www.cylview.org>), .
- 16 X. Pan, H. Wang, C. Li, J. Z. H. Zhang and C. Ji, *J. Chem. Inf. Model.*, 2021, **61**, 3159–3165.
